# Supplementary material for: Multicomponent reactions (MCRs) yielding medicinally relevant rings: a recent update and chemical space analysis of the scaffolds
Source: Royal Society of Chemistry journal article supplement (doi:10.1039/d4ra06681b), 2025-01-01
Supplement: d4ra06681b1.xlsx [file d4ra06681b1.xlsx]

## Sheet: Sheet1
Smiles	frequency	Dataset Name	Shape Index	Molecular Complexity	Small Rings	Globularity (SVD)
c1n[n](C(C=CN2)c3ccccc3)c2n1	1	MCR Scaffolds	0.53333	0.72855	3	0.58045
O=P(C1c(c2ccccc2cc2)c2OC(c2ccccc2)=C1)(c1ccccc1)c1ccccc1	1	MCR Scaffolds	0.35294	0.87495	6	0.58019
O=C1OCC2=C1C(c(cc1)cc3c1OCO3)C(C(c(cccc1)c1C1=O)=O)=C1N2	1	MCR Scaffolds	0.41379	0.95224	6	0.52909
c1ccc([C@@]([C@H]2Nc3ccccc3)(Nc3ccccc3)Oc3c2c2ccccc2cc3)cc1	1	MCR Scaffolds	0.36364	0.89258	6	0.51662
N=C(C1=C2C3=CNC1=O)OC2(c1cc2ccccc2cc1)[n]1c3nc2c1cccc2	1	MCR Scaffolds	0.4	1.0513	7	0.5107
c(cc1)ccc1C1=Cc(cccc2)c2C=CN1c1ccc2ncccc2c1	1	MCR Scaffolds	0.44444	0.78115	5	0.49931
O=C([C@@H]1c2ncccc2)NC(c2ccccc2)=N[C@@H]1c1c(-c2ccccc2)nc(-c2ccccc2)nc1	1	MCR Scaffolds	0.40541	0.91169	6	0.48601
O=C1NC(c2ccc[o]2)Nc2c1cccc2	1	MCR Scaffolds	0.5625	0.7569	3	0.48193
O=C(C(C1C(c2ccccc2)=O)C1(c(cccc1)c1N1)C1=O)c1ccccc1	1	MCR Scaffolds	0.42857	0.86153	5	0.47487
O=C(C12N(CCC3)C3C=C1)N(Cc1ccccc1)c1c2cccc1	1	MCR Scaffolds	0.45833	0.90702	5	0.4732
O=C(CC1c2ccccc2)c2c1cccc2	1	MCR Scaffolds	0.5625	0.67534	3	0.44159
O=C(C(C1c2cc3ccccc3cc2)=COC(C(c2c3cccc2)=O)=C1C3=O)c1ccccc1	1	MCR Scaffolds	0.38235	0.89932	6	0.44126
C(C1)C=CC(C2c3ccccc3)=C1Oc1c2nc(-c2ccccc2)[o]1	1	MCR Scaffolds	0.48	0.90245	5	0.43586
O=C(C12C=CN(CCC3)C3C=C1)N(Cc1ccccc1)c1c2cccc1	1	MCR Scaffolds	0.5	0.86015	5	0.4172
O=S(c1ccccc1)(N(C1)CC(c2ccccc2)=CC1c1cc(OCC2)c2cc1)=O	1	MCR Scaffolds	0.43333	0.81625	5	0.40782
c(cc1)ccc1C([n]1c2nc3c1cccc3)=C1C2=CN(c(cccc2)c2N2)C2=C1	1	MCR Scaffolds	0.41379	0.96709	7	0.40297
O=C(CC1)C(CC2)[C@@H]1[C@H](CCc1c3)[C@H]2c1cc(C(C1=CN(C2)c4ccccc4)=O)c3OC1N2c1ccccc1	1	MCR Scaffolds	0.4359	0.93668	8	0.39649
C(CN(Cc1c2)CSC[n]1c1c2cccc1)c1ccc[s]1	1	MCR Scaffolds	0.57143	0.78472	4	0.3938
C(c1ccccc1)[n]1c(cccc2)c2c2c1CCN(Cc1cccc3ccccc13)C2	1	MCR Scaffolds	0.51613	0.8591	6	0.38612
O=C1c(cccc2)c2C(N(CC2)[C@H](C3)N2c2ccccc2)=C1C3c1ccccc1	1	MCR Scaffolds	0.41379	0.93546	6	0.36951
c([n](-c1ccccc1)nc1)c1Sc1ccccc1	1	MCR Scaffolds	0.66667	0.64904	3	0.36923
O=C(c1cc(cccc2)c2[nH]1)NC1CCCCCCC1	1	MCR Scaffolds	0.6	0.71096	2	0.35792
O=C1NCCc2c1c(Nc1ccccc1)c(-c1ccncc1)[nH]2	1	MCR Scaffolds	0.47826	0.86118	4	0.35697
C([n](c(-c1ccccc1)c1)nc1-c1ncccc1)[n]1nnc2c1cccc2	1	MCR Scaffolds	0.48148	0.85699	5	0.35574
c([n](cc1[Se]c2ccccc2)-c2ccccc2)c1[Se]c1ccccc1	1	MCR Scaffolds	0.48	0.6621	4	0.35315
C1=C2C(c3nc(cccc4)c4[nH]3)=COC2(c2ccccc2)[n]2c(cccc3)c3nc12	1	MCR Scaffolds	0.43333	0.99528	7	0.34996
C(C12)=C(c3ccccc3)OC1OC=C2c1nc(cccc2)c2[s]1	1	MCR Scaffolds	0.56522	0.84935	5	0.34296
c(cc1)ccc1-c1cccnc1Nc1ccccc1	1	MCR Scaffolds	0.57895	0.68511	3	0.34226
O=C(c(cccc1)c1-c1ccc2C(N3Cc4ccccc4)=O)c1c2C3=O	1	MCR Scaffolds	0.5	0.85083	5	0.3346
O=C(C(c1c(-c2ccccc2)nc2[n]1cccc2)=CN1)NC1=O	1	MCR Scaffolds	0.47826	0.89853	4	0.3345
O=C(c(cc1)c2cc1-c1ccccc1)N(Cc1ccccc1)C2=O	1	MCR Scaffolds	0.58333	0.73114	4	0.33079
C(C[n]1cccc1)c1ccccc1	1	MCR Scaffolds	0.69231	0.42063	2	0.32745
C(C1CCCCC1)[n]1nnc(-c2ccccc2)c1-c1ncc[o]1	1	MCR Scaffolds	0.52174	0.82582	4	0.30669
C(c1ccccc1)[n]1nnnc1-c([nH]c1c2)cc1cc1c2OCCO1	1	MCR Scaffolds	0.56	0.85009	5	0.30548
C(CNCC1)C1N(CC1)Cc2c1c(cccc1)c1[o]2	1	MCR Scaffolds	0.57895	0.78878	4	0.30528
C(c1c2)NCOC[n]1c1c2cccc1	1	MCR Scaffolds	0.57143	0.74654	3	0.29974
C(CNC1)c2c1[nH]c1c2cccc1	1	MCR Scaffolds	0.53846	0.74654	3	0.25357
O=C(c(cc1)cc2c1OCCO2)c1nc(Nc2ccccc2)ncn1	1	MCR Scaffolds	0.6	0.74421	4	0.23818
O=C1NC=Nc2c1c(-c1ncccc1)c[s]2	1	MCR Scaffolds	0.5625	0.82405	3	0.22838
c([n](-c1ccccc1)nc1)c1-c1c(-c2ccccc2)nc(-c2ccccc2)[s]1	1	MCR Scaffolds	0.5	0.85231	5	0.22624
c(cc1)cc2c1[o]c(-c1cccc3ccccc13)n2	1	MCR Scaffolds	0.52632	0.73028	4	0.166
C(N(C1)C2)N3CN2CN1C3	1	Drug Scaffolds	0.5	0.32432	4	1.062
O=C1C(CC2)CCN2C1	1	Drug Scaffolds	0.55556	0.54161	3	0.99084
C(C(C1)C2)C3CC2CC1C3	4	Drug Scaffolds	0.5	0.29863	4	0.98739
C(c1cccc(Cc2cccc(Cc3cc(C4)ccc3)c2)c1)c1cccc4c1	1	Drug Scaffolds	0.39286	0.45401	4	0.961
c(cc1)ccc1[P+](c1ccccc1)(c1ccccc1)c1ccccc1	2	Drug Scaffolds	0.36	0.46544	4	0.93474
c1cnc[n]1C(c1ccccc1)(c1ccccc1)c1ccccc1	2	Drug Scaffolds	0.375	0.64597	4	0.92417
C(C1)C2COC1CC2	1	Drug Scaffolds	0.5	0.51986	3	0.90149
C(C1)C2CCN1CC2	2	Drug Scaffolds	0.5	0.44794	3	0.89106
C(C1)C2CC1CC2	2	Drug Scaffolds	0.57143	0.17329	3	0.84176
O=C1N(C2)CCC[C@H]2N1	2	Drug Scaffolds	0.55556	0.65917	3	0.83786
C1C2C=CCC1C2	1	Drug Scaffolds	0.57143	0.44794	3	0.83481
O=C1N(C2)CC=C[C@H]2N1	1	Drug Scaffolds	0.55556	0.6993	3	0.83336
C1[C@H](CC2)C[C@H]2C1	1	Drug Scaffolds	0.57143	0.17329	3	0.81155
C=C(C1)[C@H](CC[C@@H](CC2)O[C@H](C[C@@H]3OCC[C@H]3C3)C2=C)O[C@H]1CC[C@](C[C@H]1O[C@H]24)(O[C@@H]1[C@@H]2O[C@H]1CC2)O[C@H]4[C@H]1O[C@H]2CC3=O	1	Drug Scaffolds	0.34091	0.8598	9	0.79134
C(CC1)CC([C@H](C2)NCC3)[C@]13c1c2cccc1	1	Drug Scaffolds	0.47059	0.76387	4	0.79122
C(CC1)C[C@H]([C@H](C2)NCC3)[C@]13c1c2cccc1	4	Drug Scaffolds	0.47059	0.76723	4	0.78906
O=C1C(CC2)C[C@H]2C1	1	Drug Scaffolds	0.625	0.40236	3	0.77576
O=C(/C=C/C=C\CC/C=C/CCCCCC1)Nc2cc1ccc2	1	Drug Scaffolds	0.47826	0.61487	1	0.76945
O=C([C@@H]([C@@H]1c2ccncc2)NC2(CCCCC2)[C@@]1(c(cccc1)c1N1)C1=O)N[C@H]1COCCC1	1	Drug Scaffolds	0.38235	0.96055	6	0.76056
C1CC([C@@H](Cc2ccc3)NCC4)[C@]44c2c3O[C@H]4C1	2	Drug Scaffolds	0.38889	0.90219	5	0.75696
C1[C@]23c(c(C4)ccc5)c5O[C@H]2CC=C[C@H]3[C@@H]4NC1	3	Drug Scaffolds	0.38889	0.91072	5	0.7544
C1CC([C@@H](Cc2ccc3)NCC4)[C@]44c2c3O[C@H]4C1	1	Drug Scaffolds	0.38889	0.88315	5	0.75111
O=C(CCCCCCCCCCCC(CCC1)O[C@H]1C1)OCCCC/C=C\C=C/CC/C=C\C=C/C=C\C=C/[C@@H]1O[C@@H]1OCCCC1	1	Drug Scaffolds	0.51064	0.68745	2	0.74972
O=C1c(c(C2=NC3(CCNCC3)NC2=C2N3)c(cc4)C2=O)c4OC1O/C=C/CCCCCCCC/C=C/C=C\C3=O	2	Drug Scaffolds	0.41463	0.97476	5	0.74815
C1C[C@@H]([C@@H](Cc2ccc3)NCC4)[C@]44c2c3O[C@H]4C1	1	Drug Scaffolds	0.38889	0.8855	5	0.746
C(C1)[C@H]2[NH2+][C@@H]1CCC2	1	Drug Scaffolds	0.5	0.48648	3	0.73485
C(CC1)C[C@@H]([C@@H](C2)NCC3)[C@@]13c1c2cccc1	2	Drug Scaffolds	0.47059	0.79048	4	0.73227
O=C1N(CC(Nc2c3cccc2)=O)C3(c2ccccc2)OC=C1	1	Drug Scaffolds	0.3913	0.86791	4	0.73107
O=C(CCC1[C@]23CCN[C@@H]1C1)[C@@H]2Oc2c3c1ccc2	3	Drug Scaffolds	0.36842	0.92351	5	0.72871
C1CC1	3	Drug Scaffolds	0.66667	0	1	0.70764
O=C(C=C1)C=C(C(N2[C@H]3COCC2)=O)N1N3[C@@H]1c(cccc2)c2SCc2c1cccc2	1	Drug Scaffolds	0.35484	0.95022	6	0.70625
O=C1c2c(c3c(c(N4)c5)[n](cccc6)c6n3)c5ccc2OC1O/C=C\CCCCCCCC/C=C\C=C/C4=O	1	Drug Scaffolds	0.41026	0.93046	5	0.70595
O=C(N(C1c2ccccc2)C(c2ccccc2)=NC1c1ccccc1)N1CCNCC1	1	Drug Scaffolds	0.3871	0.85628	5	0.70097
O=C(CC[C@@H]1[C@]23CCN[C@@H]1C1)[C@@H]2Oc2c3c1ccc2	2	Drug Scaffolds	0.36842	0.90677	5	0.70088
C(CNC(C1)C2)C1c1c2cccc1	1	Drug Scaffolds	0.53846	0.68393	3	0.70021
O=C(CCC1[C@]23CCN[C@@H]1C1)[C@@H]2Oc2c3c1ccc2	2	Drug Scaffolds	0.36842	0.90475	5	0.69714
O=C([C@H]1[C@@H]2[C@@H]3O[C@@H]1CC3)OC2=O	1	Drug Scaffolds	0.5	0.77181	4	0.69705
C1[C@]23c(c(C4)ccc5)c5O[C@H]2CC=C[C@H]3[C@@H]4NC1	1	Drug Scaffolds	0.38889	0.92768	5	0.69571
O=C(c1c2cccc1)OC2(c1ccccc1)c1ccccc1	1	Drug Scaffolds	0.40909	0.73114	4	0.6932
O=C(CCCCCC[C@H]1O[C@H]1C[C@@H](/C=C/c1c[s]cn1)N1)CCCC1=O	1	Drug Scaffolds	0.53846	0.69203	2	0.68436
C1[C@@H]2OC(C3)O[C@H]1C[C@@]31NC=NC[C@@H]21	1	Drug Scaffolds	0.5	0.83144	5	0.68266
O=C1OC[C@@H](c2c3ccc4c2OCO4)N(C[C@H](C2)N[C@@H]4c5c2cccc5)[C@H]4[C@@H]3SC[C@]11NCCc2c1cccc2	1	Drug Scaffolds	0.35	0.99795	8	0.67401
O=C([C@@H]([C@@H]1c2ccccc2)NC2(CCCCC2)[C@@]1(c(cccc1)c1N1)C1=O)NC1(CC2)CCC2CC1	1	Drug Scaffolds	0.36111	0.95369	8	0.67258
O=C1c2c(c3c(c(N4)c5)[n](cccc6)c6n3)c5ccc2OC1O/C=C\CCCCCCCC/C=C\C=C/C4=O	1	Drug Scaffolds	0.41026	0.93046	5	0.66995
O=C1NC[C@@]11NCCC1	1	Drug Scaffolds	0.55556	0.73778	2	0.66868
O=C1NN=C([C@@H]2c3ncn[nH]3)c3c1cccc3N[C@@H]2c1ccccc1	1	Drug Scaffolds	0.44	0.91876	5	0.66329
O=C(C1(c2ccccc2)c2ccccc2)Nc2c1cccc2	3	Drug Scaffolds	0.40909	0.72141	4	0.66126
C(c1ccccc1)N[C@@H]1[C@H](C(c2ccccc2)c2ccccc2)N2CCC1CC2	1	Drug Scaffolds	0.44828	0.75973	6	0.65878
O=C(c(cn[n]1cc2)c1nc2NC1)NCCOc2c1cccc2	1	Drug Scaffolds	0.47826	0.83521	3	0.65861
O=C(CN1CCNCCNCCNCC1)N[C@H](Cc1ccccc1)C(N[C@@H](CSSCCNC(CNC(CNC([C@@H](Cc1c[nH]c2c1cccc2)NC([C@H](Cc1ccccc1)N1)=O)=O)=O)=O)C1=O)=O	1	Drug Scaffolds	0.37681	0.83479	4	0.6582
O=C([C@@H](C(c1c2cccc1)c1ccccc1)N2S(c1ccccc1)(=O)=O)N1CCCC1	1	Drug Scaffolds	0.3871	0.89906	5	0.65816
O=C(CCC[C@H]1c2nc(cc(cc3)-c4c[o]nc4)c3[n]2C2CCCCC2)N1c1ccccc1	1	Drug Scaffolds	0.42424	0.89119	6	0.65641
O=C(CCCCOC(C[C@H](C[C@H](CC1)O[C@@H]2OCCCC2)O[C@@H]2OCCCC2)=O)[C@@]11OC1	1	Drug Scaffolds	0.40625	0.69646	3	0.65518
O=C(CCCCCC[C@H]1O[C@H]1C[C@@H](/C=C/c1c[s]cn1)O1)CCCC1=O	1	Drug Scaffolds	0.53846	0.68393	2	0.65373
N=C1N(CCC2)[C@]22NC=N[C@H]2CN1	1	Drug Scaffolds	0.46154	0.82405	3	0.65307
C(CNCC1)C1=C1c(cccc2)c2C=Cc2c1cccc2	1	Drug Scaffolds	0.42857	0.73536	4	0.64883
O=C(C[C@H](C1)O[C@@H]2OCCCC2)OCCCCNCCCC[C@@H]1O[C@@H]1OCCCC1	1	Drug Scaffolds	0.43333	0.63799	2	0.63999
C(COc1cc(-c2nc(N3)ncc2)ccc1)/C=C/CNCc1cccc3c1	1	Drug Scaffolds	0.44444	0.74499	3	0.63796
O=C([C@H](Cc(cc1)ccc1Oc(cc([C@H](C(N[C@@H]12)=O)NC(CNC(CC3)=O)=O)cc4Oc5ccc3cc5)c4O[C@@H]3OCCC[C@H]3O[C@@H]3OCCCC3)NC1=O)NCc(cccc1)c1-c1cccc2c1	2	Drug Scaffolds	0.33333	0.90627	7	0.63781
O=C(CN1C2(c3ccccc3)OCC1)Nc1c2cccc1	2	Drug Scaffolds	0.42857	0.83807	4	0.63718
C(C1)C1c([nH]c1c2)nc1c(C(c1ncccc1)c1ncccc1)cc2-c1c[o]nc1	1	Drug Scaffolds	0.36667	0.86954	6	0.63503
O=C(CN1C2(c3ccccc3)OCC1)Nc1c2cccc1	3	Drug Scaffolds	0.42857	0.83807	4	0.63437
C(CC1(CC2)[C@]34CCN[C@@H]1C1)C2[C@@H]3Oc2c4c1ccc2	1	Drug Scaffolds	0.35	0.9155	7	0.6338
O=C(CCCCCC(C/C=C\C=C/C=C\C=C/C=C\C=C/C=C\[C@@H](C[C@@H](CCC1)OC1CCCCCCCCCC(CCC1)=O)O[C@@H]2OCCCC2)OC1=O)c1ccccc1	1	Drug Scaffolds	0.52459	0.72942	3	0.63337
C1[C@H]2OCC[C@H]2OC1	3	Drug Scaffolds	0.625	0.57565	2	0.63259
C=C(C1)[C@H](CC[C@@H](CC2)O[C@H](C[C@@H]([C@@H](C3)O4)O[C@@H](C5)[C@H]3O[C@H](C3)[C@@H]5O[C@]3(C3)O[C@@H](CC5)[C@H]3O[C@@]5(CC3)O[C@@H]5[C@H]3OCCC5)C2=C)O[C@H]1CC[C@](C[C@@H]1O[C@H]23)(O[C@@H]1[C@@H]2O[C@H]1CC2)O[C@H]3[C@H]1O[C@H]2CC4=O	1	Drug Scaffolds	0.37681	0.85875	15	0.63184
O=C([C@H](c1ccccc1)N(C([C@H](CCC1=O)N1c1ncccc1)=O)c1cnccc1)NC1CCC1	1	Drug Scaffolds	0.4	0.87464	5	0.62935
C(C[NH2+][C@H]1Cc(cc2)ccc2Oc2c([C@@H](C3)[NH2+]CC4)c4ccc2)c(cc2)c1cc2Oc1cccc3c1	1	Drug Scaffolds	0.38889	0.82225	6	0.62656
O=C1c2c(cc(C=NN3CCNCC3)c(N3)c4)c4ccc2OC1O/C=C\CCCCCCCC/C=C\C=C/C3=O	1	Drug Scaffolds	0.475	0.84245	4	0.62605
O=C([C@H]([C@@H](CC1)OC(N(C2)Cc3c2cccc3CCCCCCOC(NC2)=O)=O)N1C2=O)NC1(CC1)C(NS(C1CC1)(=O)=O)=O	1	Drug Scaffolds	0.42222	0.88694	5	0.62551
O=S(CCc1c(CCNS(Cc2ccccc2)(=O)=O)[n](C(c2ccccc2)c2ccccc2)c2c1cccc2)(c1ccccc1)=O	1	Drug Scaffolds	0.3913	0.8878	6	0.62544
S=P(N1CC1)(N1CC1)N1CC1	1	Drug Scaffolds	0.45455	0.43984	3	0.62527
C1SCOC11C(CC2)CCN2C1	1	Drug Scaffolds	0.5	0.68745	4	0.62454
O=C1N=CNc2c1nc[n]2[C@@H]([C@@H](C1)OP(OC[C@H]([C@H](C2)O3)O[C@H]2[n]2c4ncncc4nc2)=O)O[C@@H]1COP3=O	1	Drug Scaffolds	0.48718	0.94855	6	0.62426
C(C(C1)CNCC2)C2c2c1cccc2	1	Drug Scaffolds	0.5	0.67908	3	0.62346
O=C(CCC/C=C/C=C/C=C/CC[C@H](CCC1)OC1C(C(N(CCCC1)[C@@H]1C(O[C@H](CC[C@H](CC1)CC[C@H]1[n]1nnnc1)C1)=O)=O)=O)CC/C=C/CC1=O	1	Drug Scaffolds	0.44444	0.83229	4	0.62136
C1OC1[C@@H](CCCC1)[C@]11OC1	2	Drug Scaffolds	0.54545	0.71045	3	0.61876
O=C(CCC/C=C/C=C/C=C/CC[C@H](CCC1)OC1C(C(N(CCCC1)[C@@H]1C(O[C@H](CCC1CCCCC1)C1)=O)=O)=O)CC/C=C/CC1=O	4	Drug Scaffolds	0.42857	0.80649	3	0.61711
O=C([C@@](c1c2cccc1)(c1ccccc1)N1CCCC1)N2S(c1ccccc1)(=O)=O	1	Drug Scaffolds	0.4	0.93689	5	0.61699
O=C(C(CCN1CCOCC1)(c1ccccc1)c1ccccc1)N1CCCC1	2	Drug Scaffolds	0.39286	0.71292	4	0.61569
C(CNCC1)C1=C1c2ncccc2CCc2c1cccc2	3	Drug Scaffolds	0.42857	0.84087	4	0.61494
C(COc1c2cccc1)[C@@H]2Oc1c2[nH]cnc2ccc1	1	Drug Scaffolds	0.5	0.78115	4	0.61478
O=C(c(cccc1)c1N=C1[C@H](C2CC2)Nc2ncncc2)N1c1cnccc1	1	Drug Scaffolds	0.42857	0.89313	5	0.61337
O=C1N([C@@H](CCCCC(Nc2c3[nH]nc2)=O)c2nccc-3c2)C=NC(c(cccc2)c2-[n]2nncc2)=C1	1	Drug Scaffolds	0.43243	0.92195	5	0.61304
O=C(CCCCOC(C[C@H](C1)O[C@@H]2OCCCC2)=O)CCC[C@@H]1O[C@@H]1OCCCC1	2	Drug Scaffolds	0.43333	0.62778	2	0.61108
C1CCOCC1	35	Drug Scaffolds	0.66667	0.3662	1	0.60896
C([C@H](C1)N2CC[NH2+]CC2)C(CC2)[C@@H]1[C@H]1[C@H]2C(C[C@@H](CC2)N3CC[NH2+]CC3)[C@H]2CC1	1	Drug Scaffolds	0.55172	0.64123	6	0.60863
O=C(C[n]1ncc2c1C[C@H]1[C@@H]2C1)N[C@@H](Cc1ccccc1)c1ncccc1-c1c2[nH]ncc2ccc1	1	Drug Scaffolds	0.41667	0.9224	8	0.60783
C=C1c(cccc2)c2C=Cc2c1cccc2	1	Drug Scaffolds	0.5	0.64123	3	0.60272
O=C(c1c2cccc1)OC2(C1C=C2)c(cccc3)c3OC1=CC2=O	1	Drug Scaffolds	0.41667	0.9155	5	0.60244
C(Cc1c2-c3ccnc4ccccc34)C[n]1nc2-c1ncccc1	1	Drug Scaffolds	0.45833	0.9009	5	0.60129
O=P(OC[C@H]([C@H](C1)OP(OC2)=O)O[C@H]1[n]1c3ncnc(NC/C=C/CN4)c3nc1)O[C@@H](C1)[C@@H]2O[C@H]1[n]1c2ncnc4c2nc1	1	Drug Scaffolds	0.31818	0.86791	6	0.60116
O=C1N=CNC(N2)=C1N[C@@H](C1)[C@H]2O[C@H](CO2)[C@@H]1OP2=O	1	Drug Scaffolds	0.55	0.87987	4	0.60053
O=C1OCCC=C1	1	Drug Scaffolds	0.71429	0.69315	1	0.60031
O=C1C=CCCC1	1	Drug Scaffolds	0.71429	0.59725	1	0.59837
O=C(C(c1c[n](CCCOCC2)c3c1cccc3)=C1c3c[n]2c2c3cccc2)NC1=O	2	Drug Scaffolds	0.3871	0.88404	5	0.59835
O=C1c2c(cc(/C=N/N3CCNCC3)c(N3)c4)c4ccc2OC1O/C=C\CCCCCCCC/C=C\C=C/C3=O	1	Drug Scaffolds	0.475	0.84245	4	0.59568
C([C@H](C1)[NH+]2CCCCC2)C(CC2)[C@@H]1[C@H]1[C@H]2C(C[C@@H](CC2)N3CCCCC3)[C@H]2CC1	2	Drug Scaffolds	0.55172	0.69315	6	0.5954
O=C(CCN1)CC1=O	1	Drug Scaffolds	0.625	0.59947	1	0.59457
O=C([C@H](C[C@H](C1)OC(N2CCCCC[C@H](CCC3)[C@@H]3OC(N[C@H]3C4CCCC4)=O)=Nc(cccc4)c4C2=O)N1C3=O)NC1(CC1)C(NS(C1CC1)(=O)=O)=O	1	Drug Scaffolds	0.33333	0.93505	7	0.59393
O=C([C@@](C1)([C@@H]1/C=C/CCCCC[C@@H](C(N(C1)[C@H]2C[C@H]1Oc1nc3ccccc3nc1CCCCC[C@H](CCC1)[C@@H]1O1)=O)NC1=O)NC2=O)NS(C1CC1)(=O)=O	1	Drug Scaffolds	0.32727	0.94009	6	0.59345
C1CCNCC1	12	Drug Scaffolds	0.66667	0.3662	1	0.5923
O=C1O[C@H]2C3=CCC[C@@H]3CCCC2C1	1	Drug Scaffolds	0.5	0.73284	3	0.59189
O=C1OCCCC1	1	Drug Scaffolds	0.71429	0.59725	1	0.5895
N=C(CCCCOC(C[C@H](C1)O[C@@H]2OCCCC2)=O)CCC[C@@H]1O[C@@H]1OCCCC1	1	Drug Scaffolds	0.43333	0.66071	2	0.58718
O=C([C@]1(c(cccc2)c2OCC1)N1)NC1=O	1	Drug Scaffolds	0.5	0.84556	3	0.58705
O=C1N(CC2CC2)c(cccc2)c2C(c2ccccc2)=NC1	2	Drug Scaffolds	0.5	0.79438	4	0.58696
C(COC1c2ccccc2)NCc2c1cccc2	1	Drug Scaffolds	0.5	0.68976	2	0.58567
O=C([C@]12NCCc3c1[nH]c1c3cccc1)Nc1c2cccc1	1	Drug Scaffolds	0.45455	0.94855	5	0.5835
C(CNCC1)C1(c1ncc[n]1CC1)c2c1cccc2	1	Drug Scaffolds	0.42105	0.79656	4	0.58296
C1OC1	2	Drug Scaffolds	0.66667	0	1	0.58278
O=C(CN1[C@@H](CN2CCOCC2)CNCC1)N(CC1)c2c1ncc(Cc1ccccc1)c2	1	Drug Scaffolds	0.5625	0.81719	5	0.58265
O=C(c1cnccc1)OCC(COC(c1cnccc1)=O)(COC(c1cnccc1)=O)COC(c1cnccc1)=O	1	Drug Scaffolds	0.36585	0.56446	4	0.58231
O=C(c1c(N2C3CC3)nccc1)Nc1c2nccc1	1	Drug Scaffolds	0.42105	0.85194	4	0.58029
O=C(CCCCNC([C@H](CCC1)N1C(CNC([C@H](CCc1ccccc1)NC([C@H]1N2CCC1)=O)=O)=O)=O)NCC2=O	1	Drug Scaffolds	0.41463	0.70075	3	0.57922
C1Oc(c(Oc2cc([C@@H](Cc3cc(Oc4ccc(C[C@@H]5NCC6)cc4)ccc3)NCC3)c3cc2)c5c6c2)c2O1	1	Drug Scaffolds	0.35897	0.86889	7	0.57516
C1CC=CCC1	11	Drug Scaffolds	0.66667	0.3662	1	0.5745
O=C(C(c1ccccc1)N1)NC1=O	1	Drug Scaffolds	0.61538	0.61868	2	0.57412
C1CSSC1	3	Drug Scaffolds	0.6	0.54931	1	0.57314
c1nc(c(Oc2ncnc(-c3ccccc3)c2)ccc2)c2[s]1	1	Drug Scaffolds	0.54545	0.77933	4	0.57303
C=C([C@H](C1)C=CC2)[C@@H]2C(C=C2)=C1NC2=O	1	Drug Scaffolds	0.53333	0.79924	3	0.57148
O=C(c1cnccc1)N(CC1)[C@](c2c3ccnc2)(c2ccccc2)N1C3=O	1	Drug Scaffolds	0.40741	0.89853	5	0.57144
O=C(C1)N(CC2)[C@@H]1S2(=O)=O	1	Drug Scaffolds	0.6	0.80507	3	0.57086
O=C([C@@H](Cc1c[nH]c2c1cccc2)NC([C@@H](Cc1c[s]c2c1cccc2)NC(C1CCNCC1)=O)=O)N[C@@H](Cc1ccccc1)C(NC1CCNCC1)=O	1	Drug Scaffolds	0.35185	0.85945	7	0.57059
C(CC1)C[NH+]1[C@H](CC1CC2)C[C@H]1[C@H]1[C@H]2C(C[C@@H](CC2)N3CCOCC3)[C@H]2CC1	1	Drug Scaffolds	0.53571	0.69754	6	0.57008
O=C(CC1)CC2N1CCc1c2cccc1	2	Drug Scaffolds	0.53333	0.73536	3	0.56995
O=C(c1c2cccc1)NC=C2c(cccc1)c1OCC1CC1	1	Drug Scaffolds	0.5	0.80395	4	0.56822
O=C(C=C1)C=C(C(N2[C@H]3COCC2)=O)N1N3[C@@H]1c(cccc2)c2SCc2c1cccc2	1	Drug Scaffolds	0.35484	0.944	6	0.56731
C(C1)[C@]23c(cc(C(C[C@H](CCC4)CN4CC4)c5c4c(cccc4)c4[nH]5)cc4)c4N[C@H]2CCC2C=CCN1[C@H]32	2	Drug Scaffolds	0.36842	0.95206	8	0.56705
C(CNCC1)C1=C(c1ncc[n]1CC1)c2c1cccc2	1	Drug Scaffolds	0.45	0.8444	4	0.56635
O=C(C=C(CCCCCC/C=C/CC/C=C\C=C1)C2=O)C=C2NC/1=O	3	Drug Scaffolds	0.48	0.74499	1	0.56448
O=C1N(C[C@H]2CNC[C@@H]3C2)C3=CC=C1	1	Drug Scaffolds	0.5	0.72502	3	0.56351
O=C(c1c2cc[nH]1)NC=C2c(cccc1)c1Oc1ccccc1	2	Drug Scaffolds	0.52174	0.83562	4	0.56301
C(C1)C(c2ccccc2)[n]2c1cnc2	1	Drug Scaffolds	0.57143	0.70285	3	0.56261
C1CCC1	2	Drug Scaffolds	0.75	0	1	0.56173
O=C1N(C[C@@H]2CNC[C@H]3C2)C3=CC=C1	1	Drug Scaffolds	0.5	0.73536	3	0.56131
S=C1N([C@@H](CC2)Cc3c2cccc3)C=CN1	1	Drug Scaffolds	0.5625	0.70285	3	0.5603
O=S1([C@@H](C2)[C@@H]2CC1)=O	2	Drug Scaffolds	0.5	0.67701	3	0.56008
O=C1Nc(ccc([C@@H](c2cnc[nH]2)c2ccccc2)c2)c2C(c2ccccc2)=C1	2	Drug Scaffolds	0.44828	0.82405	5	0.56007
O=C(C(c1ccccc1)C(N1)=O)NC1=O	4	Drug Scaffolds	0.6	0.61678	2	0.55938
O=C(C[C@H](CCC1)O[C@]11O[C@H](Cc2nc(cccc3)c3[o]2)CCC1)c1ccc[nH]1	1	Drug Scaffolds	0.55172	0.8003	5	0.55905
O=C(Nc1c2cccc1)OC2C#CC1CC1	1	Drug Scaffolds	0.5625	0.72502	3	0.55886
C1CCCCC1	23	Drug Scaffolds	0.66667	0	1	0.55829
O=C(Cc1c2cccc1)c([s]cc1)c1C2=C1CCNCC1	2	Drug Scaffolds	0.42857	0.88752	4	0.558
O=C(CC1c2ccccc2)NC1=O	1	Drug Scaffolds	0.61538	0.61292	2	0.5577
C1NCOC1	1	Drug Scaffolds	0.6	0.80472	1	0.55769
C(CC1)CC2C1[C@@H](CC[C@@H]1[C@@]3(C4)COC[C@H]1C[C@@H]4[n]1ncnc1-c1ccncc1)C3=CC2	1	Drug Scaffolds	0.46875	0.87051	7	0.55648
O=C(c1c(CO2)cccc1)NCc1n[nH]cc1-c1cncc2c1	2	Drug Scaffolds	0.43478	0.81483	3	0.55583
C(C1)[C@@H]2[C@H]1C=CC2	1	Drug Scaffolds	0.57143	0.44794	3	0.55474
O=C1NCCCc2ncccc2[C@@H](CCC2)N2c2nc3c1cn[n]3cc2	1	Drug Scaffolds	0.42308	0.89853	4	0.55469
C(CNCC1)C1=C(c1c(CC2)[s]cc1)c1c2cccc1	1	Drug Scaffolds	0.45	0.86118	4	0.5545
C(COCC1)N1c1n[s]nc1	1	Drug Scaffolds	0.63636	0.56122	2	0.55444
O=C1N([C@H]2c(cccc3)c3OCC2)c(nc(-[n]2c(cccc3)c3nc2)nc2)c2N1	1	Drug Scaffolds	0.48276	0.91072	6	0.55327
O=S(c1ccccc1)(c1ccccc1)=O	2	Drug Scaffolds	0.6	0.48104	2	0.55327
C(C1CCCCC1)N(CCC[C@@H]1N(Cc2ccccc2)c2n[nH]nn2)c2c1cccc2	1	Drug Scaffolds	0.48387	0.81387	5	0.55316
O=C(c1c(-c2ccccc2)[s]cn1)N1[C@H](CNC(c2c(cc[o]3)c3ccc2)=O)CCCC1	1	Drug Scaffolds	0.5	0.85413	5	0.55245
C(CC1CC2)C[C@H]1[C@H](CC1)[C@H]2C2[C@@H]1Cc1n[o]cc1C2	1	Drug Scaffolds	0.5	0.65788	5	0.55205
C=C1O[C@@H](CCC2)[C@@H]2C1	1	Drug Scaffolds	0.66667	0.65917	2	0.5517
C=C(CC([C@@H](CC1)C2)[C@@H]3[C@@H]1[C@H](CCC1)C1CC3)C2=O	1	Drug Scaffolds	0.52632	0.58727	4	0.5512
C(c1cc(Nc2c(cccc3)c3nc3cccnc23)cc(CN2CCCC2)c1)N1CCCC1	1	Drug Scaffolds	0.39394	0.80395	6	0.55075
C1[C@@H]2OCC[C@@H]2OC1	2	Drug Scaffolds	0.625	0.54931	2	0.55063
O=C([C@@](C1)([C@@H]1/C=C\CCCCNC([C@H](C1)[C@H]2C[C@H]1Oc1cc(-c3ncc[s]3)nc3ccccc13)=O)NC2=O)NS(C1CC1)(=O)=O	1	Drug Scaffolds	0.4	0.9148	6	0.55031
O=S(c1cccc2cnccc12)(N1CCNCCC1)=O	2	Drug Scaffolds	0.5	0.73536	3	0.54998
c1ccc(C2OC=Nc3c2cccc3)cc1	1	Drug Scaffolds	0.5625	0.67407	3	0.54979
O=C(C(C1c2ccccc2)=CNC=C1P1(OCCCO1)=O)OCCN(Cc1ccccc1)c1ccccc1	1	Drug Scaffolds	0.44737	0.86289	5	0.54947
C(C1)[C@H]2[C@@H]1CCC2	1	Drug Scaffolds	0.57143	0.27465	3	0.54885
O=C1NN=C(CN(CCO[C@@H]2OCc3ccccc3)[C@H]2c2ccccc2)N1	2	Drug Scaffolds	0.51852	0.74957	4	0.54874
O=C1N=CC=CN1C1OCSC1	1	Drug Scaffolds	0.58333	0.71278	2	0.5485
C(CNC1)C(c2c3cccc2)=C1C3c1ccccc1	1	Drug Scaffolds	0.47368	0.79924	4	0.54836
O=C(CC1c2ccccc2)NC1=O	1	Drug Scaffolds	0.61538	0.61292	2	0.54771
O=C(CCOC(C[C@H](C[C@H]1O[C@@H]2OCCCC2)O[C@@H]2OCCCC2)=O)CC2=CCC1O2	1	Drug Scaffolds	0.41935	0.78295	3	0.54663
C([C@@H]1CNC2)[C@@H]2c2c1cc1nccnc1c2	1	Drug Scaffolds	0.5	0.75107	5	0.54612
O=C([C@H](C[C@H](C1)Oc2nc3ccccc3nc2C/C=C/CO[C@H](CCC2)[C@@H]2OC(NC2)=O)N1C2=O)NC1(CC1)C(NS(C1CC1)(=O)=O)=O	1	Drug Scaffolds	0.375	0.909	6	0.546
C=C(C[NH+](CC1)[C@@H](C2)[C@]1([C@@H]13)c(cccc4)c4N1/C=C(\[C@H]1[C@@]4(CC5)[C@H](C6)[NH+]5C5)/[C@@H]6C5=C)[C@H]2/C\3=C/N1c1c4cccc1	1	Drug Scaffolds	0.3	0.9851	10	0.54544
O=S(c1n[nH]c2c1cccc2)(c1cccc2ccccc12)=O	1	Drug Scaffolds	0.5	0.79273	4	0.54527
O=C([C@H](CC[C@@H]1CCNCC2)N1C2=O)NC(c1ccccc1)c1ccccc1	1	Drug Scaffolds	0.46429	0.76043	3	0.54491
O=C(CN1CCNCCNCCNCC1)N[C@H](Cc1ccccc1)C(N[C@@H](CSSCCNC(CNC(CNC([C@@H](Cc1c[nH]c2c1cccc2)NC([C@H](Cc1cccc2ccccc12)N1)=O)=O)=O)=O)C1=O)=O	1	Drug Scaffolds	0.35616	0.85157	5	0.54365
O=S(Cc1ccccc1)(NCCc1c(CCCc2ccccc2)c(cccc2)c2[n]1C(c1ccccc1)c1ccccc1)=O	1	Drug Scaffolds	0.40909	0.87275	6	0.54207
C1=CNC=CC1c1ccccc1	10	Drug Scaffolds	0.66667	0.51517	2	0.54206
O=C(C1C2[C@H]3O[C@@H]1CC3)OC2=O	1	Drug Scaffolds	0.5	0.75474	4	0.54149
O=C([C@H](C[C@H](C1)Oc2nc3ccccc3nc2C/C=C/CO[C@H](CCC2)[C@@H]2OC(NC2)=O)N1C2=O)NC1(CC1)C(NS(C1CC1)(=O)=O)=O	1	Drug Scaffolds	0.375	0.90752	6	0.54134
O=S(c1ccccc1)(N1CCSCC1)=O	1	Drug Scaffolds	0.6	0.57505	2	0.54092
O=C(c(cccc1)c1-[n]1nccn1)N(CCC1)C1c1nc(cccc2)c2[nH]1	1	Drug Scaffolds	0.48148	0.83928	5	0.54039
C(CNCC1)C1(c1ccccc1)c1ccccc1	1	Drug Scaffolds	0.5	0.56169	3	0.53984
O=C1c(c(C2=Nc(ccc(N3CCNCC3)c3)c3OC2=C2N3)c(cc4)C2=O)c4OC1O/C=C\CCCCCCCCC=C/C=C\C3=O	1	Drug Scaffolds	0.44681	0.98725	6	0.53883
O=P1OCCC1	1	Drug Scaffolds	0.66667	0.69315	1	0.53882
O=C(C(c1ccccc1)(c1ccccc1)C(N1)=O)NC1=O	1	Drug Scaffolds	0.42857	0.67908	3	0.53881
C1N(C(c2c3cccc2)c2ccccc2)C3=NC1	1	Drug Scaffolds	0.5	0.77933	4	0.53825
C1NCCNC1	4	Drug Scaffolds	0.66667	0.23105	1	0.53805
O=C(c1cnccc1)O[C@H]([C@H]([C@@H]([C@H]([C@@H]1OC(c2cnccc2)=O)OC(c2cnccc2)=O)OC(c2cnccc2)=O)OC(c2cnccc2)=O)[C@H]1OC(c1cnccc1)=O	1	Drug Scaffolds	0.26667	0.77181	7	0.5376
C(COCC1)C1[C@@H](c1ccccc1)[n](c1c2cccc1)c1c2ncc(-c2cnn[nH]2)c1	1	Drug Scaffolds	0.3871	0.90219	6	0.53711
c1c(C=C(C=C2)N=C2C=Nc(cccc2)c2N=CC(C=C2)=NC2=C2)[nH]c2c1	1	Drug Scaffolds	0.44444	0.71292	4	0.53678
O=C(CCC[C@@H](/C=C/C1CCCCC1)OC([C@H](CCCC1)N1C1=O)=O)C/C=C/CCCC[C@H](CCC2)OC2C1=O	2	Drug Scaffolds	0.425	0.80083	3	0.5366
O=C([C@@H](CCC1)[C@H](c(cc2)ccc2NC2CCCC2)N1C(c1ccccc1)=O)Nc1ccccc1	1	Drug Scaffolds	0.45714	0.80497	5	0.53636
C(COc(cc1)c(COC/C=C/COCc2ccc3[o]2)cc1Nc1nc-3ccn1)N1CCCC1	1	Drug Scaffolds	0.5	0.81145	4	0.53495
O=C(C=CC1=O)C(C2)=C1N1C2[C@H]2N[C@H]2C1	3	Drug Scaffolds	0.46667	0.86823	5	0.5347
O=C(c(cccc1)c1-c1ncccn1)N(C[C@H](C1)C2)[C@@H]1[C@@H]2Oc1ncccc1	2	Drug Scaffolds	0.53571	0.83685	6	0.53458
C(C1CNC2)C2c2c1cc1nccnc1c2	1	Drug Scaffolds	0.5	0.72768	5	0.53442
O=C(COCCOCC(Nc1cccc2ccccc12)=O)NCCNC([C@H](C[C@@H]([C@H]1O[C@@H]2OCCCC2)NC(C(NC(N2)=O)=CC2=O)=O)C[C@H]1O[C@@H]([C@@H]1OC(c2ccccc2)=O)OCC[C@@H]1OCCC1CCCCC1)=O	1	Drug Scaffolds	0.43421	0.92572	8	0.53432
C(CNCC1)CN1C(c1ccccc1)c1ccccc1	1	Drug Scaffolds	0.45	0.60487	3	0.53321
c1ccc(C(c2ccccc2)c2ncccc2)cc1	2	Drug Scaffolds	0.47368	0.58959	3	0.53311
O=C(CCC1)OCC/C=C/C=C/CCCC[C@@H]1O[C@@H](CC1)OC[C@H]1O[C@@H]1OCCCC1	1	Drug Scaffolds	0.6129	0.6621	2	0.53228
O=C(c(cc1)ccc1-c1n[o]c(-c2ccccc2)c1)N[C@@H](CCCNC([C@H](CCC1)N1C(CNC([C@H](CCc1ccccc1)NC([C@H](CCC1)N1C(CN1)=O)=O)=O)=O)=O)C1=O	1	Drug Scaffolds	0.47541	0.81291	6	0.53106
C1CC[NH2+]CC1	1	Drug Scaffolds	0.66667	0.3662	1	0.53099
O=C(c1c2cccc1)NC2c1ccccc1	1	Drug Scaffolds	0.5625	0.68861	3	0.53014
O=C(C1=CNc2ccn[n]2[C@@H]1c1ccccc1)N(CCC1)[C@@H]1c1ccccc1	1	Drug Scaffolds	0.46429	0.87987	5	0.53002
C(CNCc1ccc[s]1)[C@@]1(CC2(CCCC2)OCC1)c1ncccc1	1	Drug Scaffolds	0.48	0.76921	4	0.52994
O=C(c1ccccc1)N[C@H](C1)C[C@@H]2OC1[n](c(cccc1)c1c1c3CN4)c1c1[n]2c(cccc2)c2c1c3C4=O	1	Drug Scaffolds	0.38462	0.95707	9	0.52992
C(C1=NCCN1)N(c1ccccc1)c1ccccc1	1	Drug Scaffolds	0.47368	0.58251	3	0.52937
O=C1NC2(CCNCC2)SC1	1	Drug Scaffolds	0.63636	0.6452	2	0.52916
C(CC1c2c3cccc2)C3c2c1cccc2	1	Drug Scaffolds	0.5	0.63799	5	0.52896
C1[C@H](CCCC2)[C@H]2NC1	1	Drug Scaffolds	0.55556	0.57807	2	0.52892
C(CC1)CCC1(c1ccc[s]1)N1CCCCC1	1	Drug Scaffolds	0.47059	0.71292	3	0.52892
O=C(CC1CCC2)[n]3c(cccc4)c4c4c3C1N2CC4	1	Drug Scaffolds	0.45	0.92876	5	0.52883
C(c1c2cccc1)OC2c1ccccc1	3	Drug Scaffolds	0.6	0.62239	3	0.52863
O=C([C@H](C[C@H](C1)Oc2nc3ccccc3nc2CCCCC[C@H](C2)[C@@H]2OC(NC2)=O)N1C2=O)NC1(CC1)C(NS(C1CC1)(=O)=O)=O	2	Drug Scaffolds	0.3913	0.90011	6	0.52852
C(CC1)C[C@H]2N1C[C@@H]1[C@H](CCCC3)N3C[C@H]2C1	1	Drug Scaffolds	0.52941	0.68031	4	0.52673
C(C1C(CC2)CCN2C1)N1c(cccc2)c2Sc2c1cccc2	1	Drug Scaffolds	0.43478	0.72855	6	0.52621
O=C1N2C=CC[C@@H]2C1	2	Drug Scaffolds	0.625	0.77276	3	0.52545
C(CC=C[C@]12CCNC3)[C@@H]1Oc1c2c3ccc1	1	Drug Scaffolds	0.41176	0.86823	4	0.52514
O=S(c1ccccc1)(c1cc(CCCC2)c2cc1)=O	1	Drug Scaffolds	0.57895	0.67908	3	0.52443
O=C([C@H](Cc1ccccc1)NC(C(c1ccccc1)=O)=O)N(Cc1ccccc1)C(CCc1ccncc1)CCc1ccncc1	1	Drug Scaffolds	0.36957	0.76987	5	0.52419
c(cc1)ccc1-c1c(-c2ccncc2)nncn1	1	Drug Scaffolds	0.55556	0.69203	3	0.52407
O=C(C1c2ccccc2)Nc2c1cccc2	1	Drug Scaffolds	0.5625	0.69315	3	0.52363
C(c1c2cccc1)=N[C@]2(c1ccncc1)c1cccc(-c2cncnc2)c1	1	Drug Scaffolds	0.44444	0.79438	5	0.52339
O=C(CCC(N1CCCCC1)=O)N(C[C@@H](C1)Oc2cc(-c3ccccc3)nc3ccccc23)[C@@H]1C(NC1(CC1)C(NS(C1CC1)(=O)=O)=O)=O	1	Drug Scaffolds	0.38776	0.89258	7	0.52335
O=C1CC(CCC2)C2C1	1	Drug Scaffolds	0.66667	0.43944	2	0.52298
O=C(Cc1ccccc1)O[C@H](C1)C[C@@H]2[NH2+][C@H]1[C@H]1O[C@@H]21	2	Drug Scaffolds	0.63158	0.76113	6	0.52293
O=C1N=CC=CN1[C@@H]1C=CCC1	1	Drug Scaffolds	0.58333	0.69315	2	0.52288
O=C(CCC[C@H](CC1)N(c2ccccc2)O[C@H]1/C=C\CCC[C@H](CCC1)OC1C(C(N(CCCC1)[C@@H]1C(O[C@H](CCC1CCCCC1)C1)=O)=O)=O)CC/C=C/CC1=O	1	Drug Scaffolds	0.41379	0.86049	5	0.52284
O=C(C1=CNC=CC1c1ccccc1)OC1CN(Cc2ccccc2)CCC1	1	Drug Scaffolds	0.57143	0.75903	4	0.52237
O=C1Nc(cccc2)c2Nc2c1cccn2	1	Drug Scaffolds	0.5	0.76387	3	0.52095
C(Cc1cccc2ncn[n]12)c1ccccc1	1	Drug Scaffolds	0.58824	0.71581	3	0.52093
C(CC1)CC[C@]11OOC2([C@H]3CC(C4)C[C@@H]2CC4C3)O1	1	Drug Scaffolds	0.52632	0.75973	6	0.5205
C(C1)[C@]23c(cc(C(C[C@@H](CCC4)CN4CC4)c5c4c(cccc4)c4[nH]5)cc4)c4N[C@H]2CCC2C=CCN1[C@H]32	1	Drug Scaffolds	0.36842	0.95206	8	0.51956
C=C1C[C@H](CCC2)[C@H]2C1	2	Drug Scaffolds	0.66667	0.43944	2	0.51952
O=C(c1cnccc1)OC[C@H]([C@H]1OC(c2cnccc2)=O)OC(COC(c2cnccc2)=O)[C@H]1OC(c1cnccc1)=O	1	Drug Scaffolds	0.39535	0.77562	5	0.51943
O=P(OC[C@H](CC1)O[C@H]1[n]1c2ncncc2nc1)Oc1ccccc1	1	Drug Scaffolds	0.64	0.80599	4	0.51886
C1CN(CC2)C3c4c2c(cccc2)c2[n]4CCC3C1	1	Drug Scaffolds	0.47368	0.89853	5	0.5187
O=C(CCc1ccccc1)O[C@@H](CC(C1)[C@H]([C@H]2C3CC[C@H]4OCC24)OC(c2ccccc2)=O)C=C1CC3=O	2	Drug Scaffolds	0.47368	0.84166	5	0.51797
O=C(CN1CCNCC1)N(c1c[s]cc11)c(cccc2)c2NC1=O	1	Drug Scaffolds	0.45833	0.84972	4	0.51794
C(CC1)CCC1(c1ccccc1)c1ccccc1	1	Drug Scaffolds	0.5	0.56169	3	0.51752
O=C1C(O[C@H]2O[C@@H](CO[C@H]3OCCCC3)CCC2)=C(c2ccccc2)Oc2c1cccc2	1	Drug Scaffolds	0.5	0.86153	5	0.51705
C([C@@H]([C@@H]1OCC[C@@H]1OCc1ccccc1)OCc1ccccc1)OCc1ccccc1	1	Drug Scaffolds	0.51613	0.64441	4	0.51679
C1N=C(c2ccccc2)c(cccc2)c2-c2c1[o]nc2	1	Drug Scaffolds	0.5	0.81997	4	0.51652
O=C(CCCCCC(C/C=C\C=C/C=C\C=C/C=C\C=C/C=C\C(CCCCCC(CCCCCCCC(CCCC(C1)=O)=O)=O)OC2OCCCC2)OC1=O)c1ccccc1	1	Drug Scaffolds	0.51613	0.68861	2	0.51649
c(cc1)cc2c1Sc(cccc1)c1C=C2	1	Drug Scaffolds	0.53333	0.60067	3	0.51636
O=C1N[C@@H](CSC2)[C@@H]2N1	1	Drug Scaffolds	0.66667	0.6993	2	0.516
C(Oc1ccc2)Oc1c2-c1c2OCOc2ccc1	2	Drug Scaffolds	0.44444	0.70997	4	0.51568
C(C1)CN(CCc2c3)[C@]11C=CC[C@H]1c2cc1c3OCO1	1	Drug Scaffolds	0.45	0.84935	5	0.51534
C(CNC1)C11CCCCC1	1	Drug Scaffolds	0.6	0.49698	2	0.51532
O=C(C(c1ccccc1)(c1ccccc1)N1)NC1=O	2	Drug Scaffolds	0.47368	0.71581	3	0.51473
O=C(c(cc1)cc(N(C2)C[C@H](CC3)[C@@H]3C(CN3C[C@@H](CCCC4)N4CC3)/C=C/CCC3)c1OC[C@@]2(CCC1)c2c1cccc2)NS3(=O)=O	1	Drug Scaffolds	0.375	0.898	7	0.51459
O=C1C=C(CC[C@@H]2[C@@H]3CCC4C5O[C@H](C6CCCCC6)O[C@@H]5C[C@@H]24)C3C=C1	1	Drug Scaffolds	0.59259	0.79818	6	0.51438
C1N=C(c2ccccc2)c(cccc2)c2-[n]2c1cnc2	1	Drug Scaffolds	0.5	0.81145	4	0.51411
C(c1ccccc1)N[C@@H]1c(cccc2)c2NCC1	1	Drug Scaffolds	0.61111	0.68153	3	0.51377
O=P1OCCCN1	5	Drug Scaffolds	0.71429	0.73241	1	0.51366
O=C([C@@H](c1c[o]cn1)N(CC(N[C@@H]1C(C2)Cc3c2cccc3)=O)C1=O)N1CCOCC1	1	Drug Scaffolds	0.45161	0.84401	5	0.51265
O=C(C1c2ccccc2)NCNC1=O	1	Drug Scaffolds	0.57143	0.57505	2	0.51219
O=C1Nc([s]c2c3CCCC2)c3C(c2ccccc2)=NC1	1	Drug Scaffolds	0.47619	0.89258	4	0.51205
C(CC1)CC1c1ccccc1	2	Drug Scaffolds	0.63636	0.49074	2	0.51193
O=C(CC1(C2CC(C3)CC1CC3C2)c1ccccc1)N1CCC1	1	Drug Scaffolds	0.43478	0.67534	6	0.5116
O=S(C1(CCCCC1)c1ccccc1)(c1ccccc1)=O	1	Drug Scaffolds	0.47619	0.73199	3	0.51158
C(c1ccccc1)N([C@@H]1c(cccc2)c2NCC1)c1ncccn1	1	Drug Scaffolds	0.45833	0.75402	4	0.5115
O=C([C@](C1)([C@H]1/C=C\CCCCNC([C@@H](C1)[C@@H]2C[C@@H]1Oc1cc(-c3ncc[s]3)nc3ccccc13)=O)NC2=O)NS(C1CC1)(=O)=O	1	Drug Scaffolds	0.4	0.90374	6	0.51142
O=C([C@H](C[C@H](C1)Oc2nc3ccccc3nc2CCCCC[C@H](C2)[C@@H]2OC(NC2)=O)N1C2=O)NC1(CC1)C(NS(C1CC1)(=O)=O)=O	2	Drug Scaffolds	0.3913	0.90011	6	0.51139
O=S(c1ccccc1)(N(Cc1ccccc1)c1c(C2CC2)c2ccccc2cn1)=O	1	Drug Scaffolds	0.4	0.86954	5	0.51132
O=C(c1ccccc1)O[C@@H](CC1)CO[C@H]1OC/C(\C(OCC/C=C/C=C1)=O)=C\C=C\CC/C=C/C[C@H]\1O[C@@H]1OCCCC1	1	Drug Scaffolds	0.62791	0.75181	3	0.51105
O=C(C=CN1[C@@H]2[C@@H](C3)C3CC2)NC1=O	1	Drug Scaffolds	0.57143	0.70181	4	0.51093
C(C1)NCCN1C(c1ccccc1)c1ccccc1	5	Drug Scaffolds	0.47368	0.57248	3	0.51063
C1c(cccc2)c2C=Cc2c1cccc2	1	Drug Scaffolds	0.53333	0.59413	3	0.51041
O=C1C=C(CC[C@@H]2C3CCC4C5OC6(CCCC6)O[C@@H]5C[C@@H]24)C3C=C1	1	Drug Scaffolds	0.56	0.7971	6	0.51031
O=C(Cc1ccccc1)O[C@H](C1)C[C@@H]2N[C@H]1[C@H]1O[C@@H]21	1	Drug Scaffolds	0.63158	0.76113	6	0.51018
C=C(CC1)C(CC2)[C@@H]1C[C@H]2C1CCCCC1	1	Drug Scaffolds	0.625	0.52698	3	0.51014
C(C1CC1)N(CC1)[C@H](Cc2ccc3)C4(CC5)[C@]11c2c3O[C@H]1C5CC4	1	Drug Scaffolds	0.41667	0.90245	8	0.51008
O=[P@@H](CO[C@H](C=C1)O[C@H]1[n]1c2ncncc2nc1)Oc1ccccc1	1	Drug Scaffolds	0.64	0.80998	4	0.50978
O=C(CC1)N(CCCC2)[C@H]2c2c1cccc2	1	Drug Scaffolds	0.5	0.74343	3	0.50974
O=S(c1ccc[s]1)(N(C1)[C@H](Cc2ccccc2)CN(Cc2c[nH]cn2)c2c1cccc2)=O	1	Drug Scaffolds	0.375	0.86592	5	0.50969
c1ccc(C(c2ccccc2)c2ccccc2)cc1	2	Drug Scaffolds	0.47368	0.43493	3	0.50969
C(CC1CC2)CC1C1C2C(CCCC2)C2CC1	1	Drug Scaffolds	0.52941	0.37701	4	0.50945
O=C(CCC1[C@@H](C2)[NH+](CC3CC3)CC3)C[C@]13c1c2cccc1	1	Drug Scaffolds	0.45455	0.81997	5	0.5091
O=C(c1ccccc1)c1c(-c2c(-c3ccncc3)[n](Cc3ccccc3)nn2)nccc1	1	Drug Scaffolds	0.46875	0.88866	5	0.50902
C(C(c1ccccc1)OCc1c[s]cc1)[n]1cncc1	1	Drug Scaffolds	0.5	0.65788	3	0.50871
O=C(CN1CCNCC1)N(c1c2cccc1)c(nccc1)c1NC2=O	1	Drug Scaffolds	0.44	0.86758	4	0.50847
O=C([C@@H]([C@@H]1c2ccccc2)NCC1c1ccccc1)Nc1ccccc1	1	Drug Scaffolds	0.5	0.77994	4	0.5084
O=C([C@@H]([C@@H]1c2ccccc2)NC[C@@]1(c(cccc1)c1N1)C1=O)NC1CCCCC1	1	Drug Scaffolds	0.44828	0.90752	5	0.50833
C(C1)COC1[n]1cncc1	1	Drug Scaffolds	0.6	0.6993	2	0.50815
O=C(C1NC2C(C(c3c4cccc3)=O)=C1C4=O)c1c2cccc1	1	Drug Scaffolds	0.43478	0.91922	6	0.508
C(C1)[C@]23c(cc([C@@H](C[C@H](CCC4)CN4C4)c5c4c(cccc4)c4[nH]5)cc4)c4N[C@H]2CCC2C=CCN1[C@H]32	1	Drug Scaffolds	0.37838	0.94967	8	0.5075
C1CNCNC1	1	Drug Scaffolds	0.66667	0.3662	1	0.507
C1N=C(c2ccccc2)c(cccc2)c2-[n]2c1nnc2	5	Drug Scaffolds	0.5	0.79548	4	0.50699
O=S1(NC(C(C2)C3C=CC2C3)Nc2c1cccc2)=O	1	Drug Scaffolds	0.52632	0.79924	5	0.50692
O=C(CCC1[C@]23CCN(CC4CC4)[C@@H]1C1)[C@@H]2Oc2c3c1ccc2	1	Drug Scaffolds	0.43478	0.9294	6	0.50638
O=C1C=C[C@H]2C(CC[C@@H]3[C@H]4C3)[C@H]4C=CCC12	1	Drug Scaffolds	0.5	0.67019	5	0.50528
O=C(CC1)C[C@H](CC2)C1[C@@H]1[C@@H]2[C@H](CCC2)C2CC1	3	Drug Scaffolds	0.55556	0.52337	4	0.50429
C(C1)NCC2N1c1ncccc1Cc1c2cccc1	1	Drug Scaffolds	0.42105	0.82973	4	0.50424
C([C@@H](c1ccccc1)c1c2cccc1)c1c-2nc(Nc2ccccc2)nc1	1	Drug Scaffolds	0.55556	0.83562	5	0.50398
O=C(CN(CCCN1)C1=O)N[C@@H](CC[C@@H](Cc1ccccc1)NC(COc1ccccc1)=O)Cc1ccccc1	1	Drug Scaffolds	0.475	0.70492	4	0.50393
O=C(CNC([C@H]1NCCC1)=O)N[C@@H](COC([C@H](Cc1ccccc1)NC([C@H](CCC1)N1C(CNC(CC(COC(CCCN1)=O)=O)=O)=O)=O)=O)C1=O	1	Drug Scaffolds	0.40385	0.7971	3	0.50388
O=C(Cc1ccccc1)O[C@@H]1C[C@H](CC2)N[C@H]2C1	4	Drug Scaffolds	0.61111	0.67534	4	0.5038
c1ncn[n]1C(c1ccccc1)c(cc1)cc2c1nn[nH]2	1	Drug Scaffolds	0.47619	0.73864	4	0.50373
O=C1C=C(CC[C@@H]2[C@@H]3CCC4C5N=CO[C@@H]5C[C@@H]24)C3C=C1	1	Drug Scaffolds	0.57143	0.76043	5	0.50353
C([C@H](C1)[NH+]2CCCCC2)C(CC2)[C@@H]1[C@H]1[C@H]2C(C[C@@H](CC2)[NH+]3CCCCC3)[C@H]2CC1	1	Drug Scaffolds	0.55172	0.63466	6	0.50337
C(CN(CC1)C2)C1C2N(c1c(CC2)cccc1)c1c2cccc1	1	Drug Scaffolds	0.3913	0.75903	6	0.50332
O=C(CCCCCCCCCCCC(CCC1)O[C@H]1C1)OCCCC/C=C\C=C/C=C\C=C/C=C\C=C/C=C\[C@@H]1O[C@@H]1OCCCC1	1	Drug Scaffolds	0.51064	0.68393	2	0.50328
O=C(CCC1[C@]23CC[NH+](CC4CC4)[C@@H]1C1)[C@@H]2Oc2c3c1ccc2	1	Drug Scaffolds	0.43478	0.9112	6	0.50314
C=C1C=NCSC1	1	Drug Scaffolds	0.71429	0.73241	1	0.50248
C(CN(CC1)C2)C1C2C(c1ccccc1)c1ccccc1	1	Drug Scaffolds	0.42857	0.655	5	0.50228
O=C(CCCC1)C1c1ccccc1	1	Drug Scaffolds	0.61538	0.55303	2	0.50165
C(CNC1)C1=C(c1c(CC2)cccc1)c1c2cccc1	1	Drug Scaffolds	0.4	0.76723	4	0.50146
O=C(CCC1CCCC1)O[C@@H](CC1)C(CC2)[C@@H]1[C@H](CC1)[C@H]2c2c1cccc2	1	Drug Scaffolds	0.59259	0.72591	5	0.5013
O=S(c1ccccc1)(c1cc2cccc(N3CCNCC3)c2nc1)=O	1	Drug Scaffolds	0.56	0.77933	4	0.50113
C(CNCC1)C1C(c1ccccc1)c1ccccc1	1	Drug Scaffolds	0.47368	0.56446	3	0.50009
c(cc1)cc2c1Nc(cccc1)c1C=C2	1	Drug Scaffolds	0.53333	0.60067	3	0.49899
C(CNCC1)C1c1ccccc1	6	Drug Scaffolds	0.66667	0.51517	2	0.4987
C(C1)CO[C@H]1[n]1ncnc1	2	Drug Scaffolds	0.6	0.72218	2	0.4987
C(CC1CC2)C[C@H]1[C@H]1[C@H]2C(CCCC2)[C@H]2CC1	5	Drug Scaffolds	0.52941	0.45401	4	0.4987
C(c1cccc(C(c2ccccc2)c2cccc(C=N[n]3nnnc3)c2)c1)=N[n]1nnnc1	1	Drug Scaffolds	0.51515	0.61487	5	0.49837
O=C([C@@](C1)([C@@H]1/C=C\CCCCC[C@@H](C(N(C1)[C@H]2C[C@H]1Oc1nc(-c3ccccc3)nc3c1[o]c1c3cccc1)=O)NC(OC1CCCC1)=O)NC2=O)NS(C1CC1)(=O)=O	1	Drug Scaffolds	0.32203	0.97507	8	0.49835
O=S(c1ccccc1)([n]1cccc1)=O	1	Drug Scaffolds	0.57143	0.56169	2	0.49825
O=C1NCC(CCN2CCOCC2)C1(c1ccccc1)c1ccccc1	1	Drug Scaffolds	0.46154	0.74806	4	0.49803
O=C(C1c2ccccc2)c(cccc2)c2C1=O	3	Drug Scaffolds	0.52941	0.68273	3	0.49782
C(COCC1)N1c1nc(-[n]2c(cccc3)c3nc2)nc(N2CCOCC2)n1	1	Drug Scaffolds	0.44444	0.72591	5	0.49754
C([C@@H]1N(CC2)CCC2C1)c1ccnc2ccccc12	1	Drug Scaffolds	0.52632	0.72591	5	0.49753
O=C(C[C@H]1OCC=C2[C@@H](C3)[C@H]1[C@@H]1[C@]4(CC5)[C@@H]3N5C2)N1c1c4cccc1	1	Drug Scaffolds	0.36	0.94496	7	0.49687
O=C(CC1)C=C(CC[C@H]2[C@H](CCC3)C3C3)C1=C2[C@H]3c1ccccc1	1	Drug Scaffolds	0.45833	0.81145	5	0.49682
O=C1N=CC=CN1[C@H]1OCSC1	2	Drug Scaffolds	0.58333	0.71278	2	0.49657
C(C[C@H]12)C[C@@H]1Oc1c2cccc1	1	Drug Scaffolds	0.58333	0.70595	3	0.49649
O=C(CC1CCCCC1)N(CCC1)[C@@H]1C(Nc1c(-c2ccccc2)nc(-c2ncc[o]2)[s]1)=O	1	Drug Scaffolds	0.48485	0.86289	5	0.49636
O=C(Cc1ccccc1)O[C@@H]1C[C@H](CC2)[NH2+][C@H]2C1	3	Drug Scaffolds	0.61111	0.67534	4	0.49609
C(CC1)CC1O[C@@H](CC1)C(CC2)[C@@H]1[C@H](CC1)[C@H]2C2[C@@H]1C[C@@H]1S[C@@H]1C2	1	Drug Scaffolds	0.54167	0.655	7	0.49606
O=S(c1ccccc1)(Nc1cc(-c2c(-c3ncncc3)[s]cn2)ccc1)=O	1	Drug Scaffolds	0.55556	0.8075	4	0.49604
C(C12)NCC1c(cccc1)c1Oc1c2cccc1	1	Drug Scaffolds	0.44444	0.71292	4	0.49578
C(C1N(CC2)CC[C@H]2C1)c1ccnc2ccccc12	3	Drug Scaffolds	0.52632	0.72855	5	0.49533
C(CC1)CCN1c1ncncc1	1	Drug Scaffolds	0.66667	0.59725	2	0.49524
O=C(C(c1ccccc1)N1)NC1=O	1	Drug Scaffolds	0.61538	0.61868	2	0.49516
O=C(Nc(cn[n]1cc2)c1nc2N(CCC1)C1c1ccccc1)N1CCCC1	1	Drug Scaffolds	0.53571	0.85083	5	0.49509
O=C(CCC1[C@]23CCN(CC4CC4)[C@@H]1C1)[C@@H]2Oc2c3c1ccc2	1	Drug Scaffolds	0.43478	0.9112	6	0.49463
O=C([C@H](CCCC1)N1C(C(c1ccccc1)=O)=O)OC(CCCc1cnccc1)CCCc1cnccc1	1	Drug Scaffolds	0.47368	0.76387	4	0.49452
C(c1c(cc[nH]2)c2ccc1)N(CCCC1)[C@@H]1c1ccccc1	1	Drug Scaffolds	0.5	0.74185	4	0.49448
O=C(Nc1c[s]c(-c(cc2)nc(-c3c[s]c(-c4c[s]c([C@H](Cc5ccccc5)NC(CNC(c5c[s]c(CNC(c6c[s]c(CNC7=O)n6)=O)n5)=O)=O)n4)n3)c2-c2nc7c[s]2)n1)OC1CCCCC1	1	Drug Scaffolds	0.4058	0.97737	9	0.49409
C(C(CC1)c2c1cccc2)c1c[nH]cn1	1	Drug Scaffolds	0.6	0.66755	3	0.49382
O=C(C1(C2)Cc3c2cccc3)N=C2N1C=CC=C2	1	Drug Scaffolds	0.5	0.81951	4	0.49373
C([C@H](C1CC2)[C@H]3[C@H]2C(CCCC2)C2=CC3)C=C1c1cccnc1	1	Drug Scaffolds	0.56522	0.73284	5	0.49366
O=S(c1ccc(C2CC2)cc1)(Nc(cccc1)c1Oc1ccccc1)=O	1	Drug Scaffolds	0.57692	0.71096	4	0.49361
O=C1OCCCCCCCCCCc2c1cccc2	1	Drug Scaffolds	0.52632	0.64904	1	0.49346
C(C1CC1)N(CC1)[C@H](Cc2ccc3)C4(CC5)[C@]11c2c3O[C@H]1C5CC4	1	Drug Scaffolds	0.41667	0.9215	8	0.49309
N=C(CCCCOC(C[C@H](C1)O[C@@H]2OCCCC2)=O)CCC[C@@H]1O[C@@H]1OCCCC1	1	Drug Scaffolds	0.43333	0.63297	2	0.49268
C(C1)CO[C@H]1[n+]1ccccc1	1	Drug Scaffolds	0.63636	0.56687	2	0.49241
C1CN(CC2)C3c4c2c(cccc2)c2[n]4C=CC3C1	1	Drug Scaffolds	0.47368	0.9148	5	0.49203
O=C1OC(COC(CC(C[C@H](CCCC(C2)=O)O[C@@H]3OCCCC3)=O)=O)[C@@H]2N1CCCC[n]1cnc(-c2cnccc2)c1	1	Drug Scaffolds	0.55814	0.84479	4	0.49198
O=C(Nc1c(CCC2)c2cc2c1CCC2)NS(c1n[nH]cc1)(=O)=O	1	Drug Scaffolds	0.45833	0.78115	4	0.49188
c1c(-c2ccccc2)[nH]c2nccc(-c3c[nH]nc3-c3ccccc3)c12	1	Drug Scaffolds	0.53846	0.87307	5	0.49169
O=C1c2c(cc(/C=N/N(CC3)CCN3C3CCCC3)c(N3)c4)c4ccc2OC1O/C=C\CCCCCCCC/C=C\C=C/C3=O	1	Drug Scaffolds	0.48889	0.85304	5	0.49115
O=C(CC1)O[C@@]1(CC1)C(CC[C@@H]2C3CC4)[C@@H]1[C@@H]2C=CC3=CC4=O	1	Drug Scaffolds	0.56522	0.79438	5	0.49099
C([C@@H]1CNC2)[C@]12c1ccccc1	1	Drug Scaffolds	0.58333	0.63297	4	0.49087
O=C1c2c(ccc(N3)c4)c4ccc2OC1O/C=C\CCCCCCCC/C=C\C=C/C3=O	1	Drug Scaffolds	0.4375	0.79438	3	0.49077
C(C1)NC[C@H]2N1c1ncccc1Cc1c2cccc1	1	Drug Scaffolds	0.42105	0.82973	4	0.49076
O=C(CNP(OC[C@H](CC1)O[C@H]1N(C=CC=N1)C1=O)(Oc1ccccc1)=O)OCc1ccccc1	1	Drug Scaffolds	0.54286	0.79818	4	0.49072
C(c1c[s]cn1)N(CC1)CCC1=C(c1ccccc1)c1cccc2cccnc12	1	Drug Scaffolds	0.48276	0.79764	5	0.49032
O=C(c1cc([C@@H]2NCCc3c2cccc3)c[s]1)c1c(NC2CCCC2)ncnc1	1	Drug Scaffolds	0.51724	0.86187	5	0.49
C([C@@H](c1ccccc1)OCc1c[s]c2c1cccc2)[n]1cncc1	1	Drug Scaffolds	0.5	0.74343	4	0.48997
O=C(CCC/C=C/c1c2cccc1)/C=C\CCOC2=O	1	Drug Scaffolds	0.55	0.66348	1	0.48981
C1COC=CC1	2	Drug Scaffolds	0.66667	0.59725	1	0.48921
N=C1c(cccc2)c2C=Cc2c1cccc2	1	Drug Scaffolds	0.5	0.65353	3	0.48913
C(C1)CN2[C@H]1CCCC2	1	Drug Scaffolds	0.55556	0.52781	2	0.48901
C(C(c1ccccc1)OCc1ccccc1)[n]1cncc1	4	Drug Scaffolds	0.52381	0.626	3	0.48884
C([C@@H]1CNCC2)[C@]12c1ccccc1	1	Drug Scaffolds	0.61538	0.63799	4	0.48868
O=S1(NC(Cc2ccccc2)Nc2c1cccc2)=O	1	Drug Scaffolds	0.57895	0.7473	3	0.48811
C(C1)[C@H](C2)N[C@@H]1C[C@H]2OC(c1ccccc1)c1ccccc1	1	Drug Scaffolds	0.45455	0.68511	5	0.48803
C(C[C@H]12)C[C@@H]1Oc1c2cccc1	1	Drug Scaffolds	0.58333	0.69536	3	0.48778
O=C([C@H](CCN1CCOCC1)NC(NCc1c[s]cn1)=O)N[C@H](CC[C@H](Cc1ccccc1)NC(OCc1cnc[s]1)=O)Cc1ccccc1	1	Drug Scaffolds	0.42	0.76455	5	0.48769
O=C(C1)NCCc2c1cccc2	1	Drug Scaffolds	0.58333	0.59256	2	0.48765
C([C@@H](c1c2cccc1)c1ccccc1)[C@H]2c(cc1)cc2c1OCO2	1	Drug Scaffolds	0.5	0.73284	5	0.48763
O=C(c1ccccc1)N(CC1)C=Cc2c1c(cccc1)c1[nH]2	1	Drug Scaffolds	0.59091	0.80899	4	0.48745
C1=CNC=CC1c1cccc2n[o]nc12	1	Drug Scaffolds	0.53333	0.7177	3	0.48732
C(C1)CO[C@H]1[n]1cncc1	2	Drug Scaffolds	0.6	0.6993	2	0.48725
C(c1ccc[s]1)N(C1CCNCC1)c1ccccc1	1	Drug Scaffolds	0.47368	0.655	3	0.48724
O=C([C@@]12c(cc3OCOc3c3)c3OC1)N(Cc1ccc[o]1)c1c2cccc1	1	Drug Scaffolds	0.44444	0.93131	6	0.4872
O=C1NC([C@@H]2CN(Cc3ncccn3)CC2)=C[n]2c1cnc2C1CCOCC1	1	Drug Scaffolds	0.57143	0.8534	5	0.4871
O=C(CCC1[C@]23CC[NH+](CC4CC4)[C@@H]1C1)[C@@H]2Oc2c3c1ccc2	1	Drug Scaffolds	0.43478	0.9294	6	0.487
C1COCC1	1	Drug Scaffolds	0.6	0.54931	1	0.48698
O=C1C(O[C@@H]2O[C@H](CO[C@@H]3OCCCC3)CCC2)=C(c2ccccc2)Oc2c1cccc2	2	Drug Scaffolds	0.5	0.86357	5	0.48589
C1OCOC1	2	Drug Scaffolds	0.6	0.54931	1	0.48588
C1CC(C(c2ccccc2)c2ccccc2)NCC1	2	Drug Scaffolds	0.47368	0.62054	3	0.48552
C([C@H](C1)CCCCC2)C2c2c1cccc2	1	Drug Scaffolds	0.53333	0.63799	2	0.48516
O=C(C[C@H](c1ccccc1)NC(c1ccccc1)=O)O[C@@H](CC(C1)[C@H]([C@H]2C3CC[C@H]4OCC24)OC(c2ccccc2)=O)C=C1CC3=O	4	Drug Scaffolds	0.42553	0.86921	6	0.48508
O=S(c(cc1)ccc1N[C@H](CCN1CCCCC1)CSc1ccccc1)(Nc(cc1)ccc1N(CC1)CCN1c1cc(-c2c(-c3ccccc3)[nH]cc2)ccc1)=O	1	Drug Scaffolds	0.54386	0.82844	8	0.48493
O=C(c1ccn[n]1-c1ccccc1)Nc1cc(C(c2ccccc2)NCC2CC2)ccc1	1	Drug Scaffolds	0.5	0.77811	5	0.4849
C1CCCC1	5	Drug Scaffolds	0.6	0	1	0.48485
C(c1ncc[n]1-c1c2cccc1)N=C2c1ncccc1	1	Drug Scaffolds	0.5	0.84517	4	0.48482
O=C(C(c1ccccc1)N(CC1)Cc2c1[s]cc2)C1CC1	1	Drug Scaffolds	0.47619	0.76113	4	0.4848
C(COc(cc1)c(COC/C=C/COCc2cc3ccc2)cc1Nc1nc-3ccn1)N1CCCC1	1	Drug Scaffolds	0.51429	0.78413	4	0.48473
C(C1)[C@H](C2)N[C@@H]1C[C@@H]2c1ccccc1	6	Drug Scaffolds	0.57143	0.64283	4	0.48447
O=C1C=C(CC[C@@H]2C3CCC4C5OCO[C@@H]5C[C@@H]24)C3C=C1	2	Drug Scaffolds	0.57143	0.74882	5	0.48336
O=C1N(Cc2ccccc2)C2(CCNCC2)NC1	1	Drug Scaffolds	0.55556	0.70285	3	0.4829
O=C(C[C@H](C(NCc1ccccc1)=O)N([C@@H]([C@@H]1N([C@H](CO2)c3ccccc3)C2=O)/C=C/c2ccccc2)C1=O)N(CC1)CCC1N1CCCCC1	1	Drug Scaffolds	0.39216	0.89932	7	0.48283
O=C1N=CC=CN1[C@@H]1OCCC1	25	Drug Scaffolds	0.58333	0.71278	2	0.48275
C1C[C@H](CC2)[C@]34OOC2OC3OCC[C@@H]4C1	1	Drug Scaffolds	0.375	0.81145	5	0.4825
O=C(CCC1c2ccccc2)NC1=O	3	Drug Scaffolds	0.64286	0.62778	2	0.48242
C1CN(CC2)[C@@H]3c4c2c(cccc2)c2[n]4C=CC3C1	1	Drug Scaffolds	0.47368	0.9148	5	0.48226
O=S(c1ccccc1)(c(ccc1ncc2)cc1c2Nc1ccccc1)=O	1	Drug Scaffolds	0.53846	0.74806	4	0.48223
c1c[nH]c(cc2)c1cc2Oc1nc(Nc2ccccc2)ncc1	1	Drug Scaffolds	0.6087	0.72591	4	0.48214
C(c(cccc1)c1N1CCCC1)N1CCNCC1	1	Drug Scaffolds	0.55556	0.64904	3	0.48144
C(COc1ccccc1)[C@@H](CC1)C(CC2)C1C(CC1)C2c2c1cccc2	1	Drug Scaffolds	0.61538	0.68745	5	0.48126
C(c1ccccc1)Nc1c(COCC2)c2nc(-[n](cc2)c3c2cccc3)n1	1	Drug Scaffolds	0.51852	0.84708	5	0.48116
C(C1CCC1)N(CC1)[C@H](Cc2ccc3)C4[C@]11c2c3O[C@H]1CCC4	1	Drug Scaffolds	0.47826	0.90876	6	0.48098
O=C1N=CN=CN1[C@@H]1OCCC1	2	Drug Scaffolds	0.58333	0.71278	2	0.48028
C(CC1)CCC1c1ccccc1	5	Drug Scaffolds	0.66667	0.51517	2	0.48024
O=C(C(C1CCCC1)c1ccccc1)OC1C2CNCC1CCC2	1	Drug Scaffolds	0.45833	0.72942	4	0.4799
O=S([C@H]1C=CCCC1)(Nc1ccccc1)=O	1	Drug Scaffolds	0.625	0.61292	2	0.47952
O=C(c1ccccc1)N[C@H]1COCCC1	1	Drug Scaffolds	0.66667	0.56718	2	0.47937
C(c1ccncc1)[n]1c(Sc2ccccc2)cnc1	1	Drug Scaffolds	0.63158	0.64751	3	0.47936
O=C(c(cccc1)c1-c1ccccc1)Nc(cc1)ccc1C(N(CC1)c(cccc2)c2-c2c1nc[nH]2)=O	1	Drug Scaffolds	0.51351	0.86625	6	0.47924
c1ncn[n]1C(c1ccccc1)c1ccccc1	1	Drug Scaffolds	0.5	0.61487	3	0.47912
C1CC=CC1	1	Drug Scaffolds	0.6	0.34657	1	0.47911
O=C1N=CNCN1[C@@H]1OCCC1	1	Drug Scaffolds	0.58333	0.69573	2	0.47896
O=C(CC1)C=C(CC[C@H]2[C@H](CCC3)C3C3)C1=C2[C@H]3c1ccccc1	8	Drug Scaffolds	0.45833	0.82405	5	0.47852
C(c1cncnc1)c1cccc2c1C=CC(C1CC1)O2	1	Drug Scaffolds	0.6	0.75761	4	0.47798
O=C(N[C@@H](CCCCCCC[C@H](C1)[C@@]1(NC([C@H](C1)N2C[C@@H]1Oc1cc(-c3c[s]cn3)nc3ccccc13)=O)P(Cc1ccccc1)=O)C2=O)OC1CCCC1	1	Drug Scaffolds	0.34545	0.94245	7	0.47761
C(CC1CC2)C[C@H]1C1[C@H]2C(CCCC2)[C@@H]2CC1	1	Drug Scaffolds	0.52941	0.43493	4	0.47759
C(c1ccccc1)N1Cc(cccc2)c2SCC1	1	Drug Scaffolds	0.61111	0.61868	3	0.47757
C(CNC1)C1c1ccccc1	1	Drug Scaffolds	0.63636	0.54931	2	0.47741
C(c1ncccc1)[n]1c(cccc2)c2c2c1CCC2	1	Drug Scaffolds	0.52632	0.84284	4	0.4774
C(C[n]1c2cnc1)C2c1cc2ccccc2cc1	1	Drug Scaffolds	0.55556	0.72141	4	0.47726
C(CC1CC2)CC1[C@H](CC1)[C@H]2C2C1=CCCC2	1	Drug Scaffolds	0.52941	0.62953	4	0.47713
O=C(c1ccccc1)O[C@H](C1)[C@@H](c2ccccc2)Oc2c1cccc2	1	Drug Scaffolds	0.48	0.77872	4	0.47702
O=C(CC1)C=C(CC2)C1C1[C@@H]2[C@H](CCC2)C2CC1	2	Drug Scaffolds	0.55556	0.655	4	0.47696
O=C(CN(c(cccc1)c1-[n]1c(-c2ccccc2)nnc1[C@@H]1Cc2c[nH]c3c2cccc3)C1=O)NCc1ccccc1	1	Drug Scaffolds	0.40476	0.92396	7	0.47693
O=C(C=C(Cc1ccccc1)N1)NC1=O	1	Drug Scaffolds	0.6	0.61678	2	0.4769
C(Cc1ncccc1)c1ccccc1	1	Drug Scaffolds	0.71429	0.49057	2	0.47689
C=C1c(cccc2)c2SCc2c1cccc2	1	Drug Scaffolds	0.5	0.73452	3	0.47667
C([C@@H](c1c[nH]c2c1cccc2)c1ccccc1)c1ccccc1	1	Drug Scaffolds	0.47826	0.74882	4	0.47659
O=C(C(c1c[nH]c2c1cccc2)=C1c2nc(N3CCNCC3)nc3ccccc23)NC1=O	1	Drug Scaffolds	0.4375	0.95512	6	0.47647
O=S(c(cc1)ccc1O[C@@H](CCCC1)[C@H]1c1ccn[nH]1)(Nc1ncncc1)=O	1	Drug Scaffolds	0.57143	0.77749	4	0.47615
O=C(CC1)C=C(CCC2C(CCC3)C3C3)C1=C2[C@H]3c(cc1)cc2c1OCO2	1	Drug Scaffolds	0.44444	0.8486	6	0.47578
O=C([C@@H](C1CCCC1)c1cc(C[n]2c3ncccc3c3c2cccc3)ccc1)NCc1ccccc1	1	Drug Scaffolds	0.47222	0.86823	6	0.47562
O=C1c(ccc(O[C@H]2O[C@@H](CO[C@H]3OCCCC3)CCC2)c2)c2OC(c2ccccc2)=C1	2	Drug Scaffolds	0.59375	0.81145	5	0.47561
C=C(CC1)[C@@H](CCC2=CCOC2=O)C2[C@H]1C(CO[C@@H]1OCCCC1)CCC2	1	Drug Scaffolds	0.55556	0.68273	4	0.47518
O=C(NCCC1)N1[C@@H]1OCCC1	2	Drug Scaffolds	0.58333	0.68515	2	0.47517
O=C([C@H](Cc1ccccc1)NS(c1ccccc1)(=O)=O)N1CCNCC1	1	Drug Scaffolds	0.46154	0.72049	3	0.47494
C(C[C@H]1c2ccccc2)C2c(cncc3)c3O[C@@]12c1ccccc1	1	Drug Scaffolds	0.41667	0.87774	5	0.47486
O=C(C(c1ccc[s]1)c1ccc[s]1)OC1CC(CCC2)NC2C1	1	Drug Scaffolds	0.47826	0.73114	4	0.47442
C1C[C@@H](O[C@H]2OCCCC2)OCC1	1	Drug Scaffolds	0.69231	0.47083	2	0.47438
C1C[C@H](CC2)[C@]34OOC2O[C@H]3OCC[C@@H]4C1	1	Drug Scaffolds	0.375	0.77499	5	0.47435
O=C1Nc(cccc2)c2OC1(c1ccccc1)c1ccccc1	2	Drug Scaffolds	0.43478	0.78055	4	0.47424
C1C[C@H](CC2)[C@]34OOC2O[C@H]3OCC[C@@H]4C1	3	Drug Scaffolds	0.375	0.8236	5	0.47419
C(CN(CC(c1ccccc1)c1ccccc1)Cc1ccccc1)COc1ccccc1	1	Drug Scaffolds	0.46875	0.62239	4	0.47418
C1CC[n]2nnnc2CC1	1	Drug Scaffolds	0.6	0.6993	2	0.47363
C(C(C1)C[C@H]2C3)C3C[C@@H]1[C@H]2Nc1c(cc[nH]2)c2ncc1	1	Drug Scaffolds	0.5	0.76043	6	0.47352
O=C1NC(Nc2ccccc2)=CC=C1	1	Drug Scaffolds	0.64286	0.56169	2	0.47333
O=C(N[C@@H](CCCCC/C=C\[C@H](C1)C1NC([C@H](C1)N2C[C@@H]1Oc1cc(-c3c[s]cn3)nc3ccccc13)=O)C2=O)OC1CCCC1	1	Drug Scaffolds	0.3913	0.90011	6	0.4733
O=C(c(cc1)cnc1Oc1ccccc1)N(CCC1)CCN1C1CCC1	1	Drug Scaffolds	0.65385	0.72413	4	0.47317
O=C(c1c[o]nc1)O[C@H](C1CC=C[C@H]2[C@H](C3)[C@H]3CC3)C=C[C@]13C2=O	1	Drug Scaffolds	0.5	0.82089	5	0.4731
C(C1)NCCN1c(cccc1)c1Sc1ccccc1	1	Drug Scaffolds	0.57895	0.63634	3	0.47234
C(C1CNC2)C12c1ccccc1	1	Drug Scaffolds	0.58333	0.626	4	0.47231
C(CC1CC2)C[C@H]1[C@H](CC1)[C@H]2C(C2)C1=Cc1c2cn[o]1	1	Drug Scaffolds	0.5	0.74957	5	0.47223
C(C1CC1)N(C1)C[C@H]2C3(CCCC3)[C@@H]1CN(CC1CC1)C2	1	Drug Scaffolds	0.52381	0.60487	5	0.47154
O=S(c1c(C2)cccc1)(Nc1c2cccc1)=O	1	Drug Scaffolds	0.47059	0.75329	3	0.47095
C(c1ccccc1)N1CCNCC1	1	Drug Scaffolds	0.69231	0.44158	2	0.47063
C(c1nnc[n]1-c1c2cc[s]1)N=C2c1ccccc1	2	Drug Scaffolds	0.52632	0.83521	4	0.47016
O=C(C[C@@H]1CCC2)O[C@@H]3OC4OOC13[C@H]2CC4	1	Drug Scaffolds	0.41176	0.8236	5	0.47006
O=C([C@@H](Cc1ccccc1)NC(C1(CCCC1)NC(c1cc(cccc2)c2[s]1)=O)=O)NCC1CCN(CC2CCOCC2)CC1	1	Drug Scaffolds	0.51111	0.83438	6	0.46986
O=C([C@@H](c1cnccc1)N(CC(N[C@@H]1C(C2)Cc3c2cccc3)=O)C1=O)N1CCOCC1	1	Drug Scaffolds	0.4375	0.84008	5	0.46955
O=C1N(Cc2ccccc2)N=CC1	1	Drug Scaffolds	0.61538	0.54381	2	0.46954
O=C(CNP(OC[C@H](CC1)O[C@H]1N(C=CC(N1)=O)C1=O)(Oc1cccc2ccccc12)=O)OCc1ccccc1	1	Drug Scaffolds	0.5	0.83479	5	0.46944
O=C(c1ncccc1)N[C@@H](COC([C@H](c1ccccc1)NC([C@H](CC(CC1)=O)N1C([C@H](Cc1ccccc1)NC([C@H](CCC1)N1C(CN1)=O)=O)=O)=O)=O)C1=O	1	Drug Scaffolds	0.38182	0.8598	5	0.46942
C=C(CCC1[C@]23CCN(CC4CC4)[C@@H]1C1)[C@@H]2Oc2c3c1ccc2	1	Drug Scaffolds	0.43478	0.9112	6	0.46922
O=C(c1ncccc1)N[C@@H](COC([C@H](c1ccccc1)NC([C@H](CC([C@H](CS[C@H]1C(CC2)CCN2C1)C1)=O)N1C([C@H](Cc1ccccc1)NC([C@H](CCC1)N1C(CN1)=O)=O)=O)=O)=O)C1=O	1	Drug Scaffolds	0.35385	0.89666	8	0.46889
O=C(C[C@@H]1CCC2)O[C@@H]3OC4OO[C@]13[C@H]2CC4	1	Drug Scaffolds	0.41176	0.81047	5	0.46888
C1O[C@H]2[C@@H]3OCOC3OC[C@H]2O1	1	Drug Scaffolds	0.5	0.67908	3	0.46859
O=C(CCc1ccccc1)O[C@H](CC1)C(CC2)[C@H]1[C@@H](CC1)[C@@H]2[C@H](CC2)C1=CC2=O	1	Drug Scaffolds	0.62069	0.73452	5	0.4684
O=C(C1)NC(CC2)N1C2=O	1	Drug Scaffolds	0.6	0.72218	2	0.46823
O=C(CNC([C@H]([C@@H](CCC1)[C@@H]1C1)N1C(CNC([C@H](C1CCCCC1)NC(c1nccnc1)=O)=O)=O)=O)C(NC1CC1)=O	1	Drug Scaffolds	0.5	0.81625	5	0.46812
O=C1C=C[C@H]2C(CC[C@@H]3[C@H]4C3)[C@H]4[C@@H]3OC3CC12	1	Drug Scaffolds	0.47059	0.74882	6	0.46769
C1CNC1	1	Drug Scaffolds	0.75	0.54931	1	0.46768
C1O[C@H]2[C@@H]3OCOC3OC[C@H]2O1	1	Drug Scaffolds	0.5	0.70075	3	0.46757
O=S(c1cnccc1)([n]1c(-c2ccccc2)ccc1)=O	1	Drug Scaffolds	0.55	0.75832	3	0.46748
O=C([C@]1(C2)[C@@H]2c(cccc2)c2-c2c(C3CCCCC3)c(cccc3)c3[n]2C1)N1C2CNCC1CC2	1	Drug Scaffolds	0.4	0.95387	9	0.46738
C1C2c(cccc3)c3N[C@H]2NC1	1	Drug Scaffolds	0.58333	0.7177	3	0.46717
C(C1)[C@@H](CNCC2)[C@@H]2C[C@H]1Oc(cccc1)c1-c1nnn[nH]1	1	Drug Scaffolds	0.54545	0.76043	4	0.46712
O=C([C@H](c1cccc(N(CCNC2)C2=O)c1CC1)N1C(/C=C/c(cccc1)c1-[n]1nnnc1)=O)Nc1ccccc1	1	Drug Scaffolds	0.41463	0.90399	6	0.46707
O=C(c(cc1)cc2c1c(C1CCCCC1)c1[n]2CC(C(NCCOCCN2)=O)=Cc3c-1cccc3)NS2(=O)=O	1	Drug Scaffolds	0.38462	0.9493	5	0.46703
O=C(N[C@H](CCNS(c1ccccc1)(=O)=O)Cc1ccccc1)O[C@@H]1COCC1	2	Drug Scaffolds	0.51724	0.68511	3	0.46663
O=C(C(C(CCC1)=O)C1=O)c1ccccc1	1	Drug Scaffolds	0.5625	0.60487	2	0.46661
C(C1)[C@]23c(cc(C(C[C@@H](C4)C=CCN4C4)c5c4c(cccc4)c4[nH]5)cc4)c4N[C@H]2CCC2C=CCN1[C@H]32	1	Drug Scaffolds	0.37838	0.95494	8	0.46648
O=C([C@H]([C@@H](c1cnccc1)N1)c(cccc2)c2C1=O)Nc1ccccc1	1	Drug Scaffolds	0.46154	0.86015	4	0.4664
c(cc1-c2ccccc2)c[n]1-c1ccccc1	1	Drug Scaffolds	0.58824	0.66485	3	0.46637
O=S(c1ccccc1)([n](cc1)c2c1cccc2)=O	1	Drug Scaffolds	0.55556	0.75107	3	0.46602
O=C(CC1)C=C(CC2)[C@H]1[C@@H](CC1)[C@@H]2[C@H]2C1C1O[C@H](c3ccc[o]3)O[C@@H]1C2	2	Drug Scaffolds	0.57692	0.81812	6	0.46601
O=C(C(C1=CCCCC1)C(N1)=O)NC1=O	1	Drug Scaffolds	0.6	0.67279	2	0.46597
C1CNCC1	5	Drug Scaffolds	0.6	0.54931	1	0.46585
O=C(c1ccccc1)NS(c1ccccc1)(=O)=O	1	Drug Scaffolds	0.61111	0.61095	2	0.46581
C(c1ccccc1)c1nc2ccccc2c(Nc2n[nH]cc2)n1	1	Drug Scaffolds	0.52174	0.77309	4	0.46563
C(C1)CNC[C@@H]1c1c(cc[nH]2)c2ccc1	1	Drug Scaffolds	0.53333	0.73945	3	0.46562
N=C1N[C@@H](CSC2)[C@@H]2N1	1	Drug Scaffolds	0.66667	0.6993	2	0.46561
C(C1)[C@H](c2ccccc2)[n]2c1cnc2	1	Drug Scaffolds	0.57143	0.70285	3	0.46557
O=C(C=CN1[C@@H]2OCCC2)NC1=O	20	Drug Scaffolds	0.61538	0.69315	2	0.46529
O=S(c1ccccc1)(Nc1n[s]nc1)=O	1	Drug Scaffolds	0.6	0.60067	2	0.46526
C(CNc1nc(N2CCOCC2)nc(-[n]2c(cccc3)c3nc2)n1)c1c(C2CCNCC2)cccc1	1	Drug Scaffolds	0.47222	0.78115	6	0.46522
O=C([C@@H](CC1)NC1=O)N1CCCCC1	1	Drug Scaffolds	0.64286	0.60487	2	0.46491
C(CNCC1)C1=C1c(cccc2)c2Sc2c1cccc2	1	Drug Scaffolds	0.45	0.75032	4	0.46482
C(C(C1)c2c[nH]cn2)c2c1cccc2	2	Drug Scaffolds	0.57143	0.62054	3	0.46481
O=C(C(C(N1)=O)C2=CCCCCC2)NC1=O	1	Drug Scaffolds	0.5625	0.68031	2	0.46473
C(CC1C2)C2CC1c1ccccc1	2	Drug Scaffolds	0.61538	0.56446	4	0.4643
O=C(c1c2[n](Cc(cc3)ccc3-c(cccc3)c3C(N3)=NOC3=O)cnc2ccc1)OCC(O1)=COC1=O	1	Drug Scaffolds	0.55263	0.87774	6	0.46422
O=C(c1cc(CCN(C(c(cc2)ccc2NC(c2c(N(C3)CC33CCOCC3)nccc2)=O)=O)c2c3cccc2)c-3[s]1)Nc1ccccc1	1	Drug Scaffolds	0.55102	0.92418	8	0.464
O=C([C@H](Cc1ccccc1)NC(N1CCNCC1)=O)N[C@@H](CCc1ccccc1)/C=C/S(c1ccccc1)(=O)=O	1	Drug Scaffolds	0.425	0.75474	4	0.46391
C1NCC(c2ccccc2)OC1	2	Drug Scaffolds	0.66667	0.59725	2	0.46386
O=C1c(cccc2)c2O[C@@]1(CC1)C=CC1=O	1	Drug Scaffolds	0.5625	0.81859	3	0.46357
C(C1c2ccccc2)NCc2c1cccc2	1	Drug Scaffolds	0.5625	0.65645	3	0.46347
O=C(NN1CC(CCC2)C2C1)NS(c1ccccc1)(=O)=O	1	Drug Scaffolds	0.61905	0.65353	3	0.46315
C(CN1CCOCC1)[n]1cncc1	1	Drug Scaffolds	0.69231	0.45984	2	0.46304
O=S(c1cnccc1)(N(Cc1ccccc1)Cc1ccccc1)=O	1	Drug Scaffolds	0.45833	0.66621	3	0.46297
O=C(C=NN1[C@@H]2OCCC2)NC1=O	1	Drug Scaffolds	0.61538	0.69536	2	0.46295
C=C(CCC1[C@]23CCN(CC4CC4)[C@@H]1C1)[C@@H]2Oc2c3c1ccc2	1	Drug Scaffolds	0.43478	0.9294	6	0.46295
C(C1)NCCN1c1cccc2c1OCCO2	1	Drug Scaffolds	0.5625	0.70595	3	0.46274
O=C1c(ccc(O[C@@H]2O[C@H](CO[C@@H]3OCCCC3)CCC2)c2)c2OC(c2ccccc2)=C1	1	Drug Scaffolds	0.59375	0.81435	5	0.46273
C(C1)CN[C@@H]1c1cccnc1	1	Drug Scaffolds	0.63636	0.64169	2	0.46257
O=C(c1c(C2c(cc3)cc4c3[nH]cn4)cccc1)N2c1ccccc1	1	Drug Scaffolds	0.44	0.82449	5	0.46256
O=C(CC1)C=C2C1=C1C=CC(CCC3)[C@@H]3[C@@H]1CC2	1	Drug Scaffolds	0.55556	0.76921	4	0.46241
C([C@H]1OC1)[C@@H]1COCCC1	1	Drug Scaffolds	0.7	0.49698	2	0.4619
C(C1)Cc2cnc[n]2C1c1ccccc1	1	Drug Scaffolds	0.53333	0.71581	3	0.46184
O=C(CNC(NCc1c[s]cn1)=O)N[C@@H](CC[C@@H](Cc1ccccc1)NC(OCc1cnc[s]1)=O)Cc1ccccc1	1	Drug Scaffolds	0.5	0.70492	4	0.46165
O=C1Nc2cccc(C(c3c4[nH]cc3)=CNC4=O)c2OC1	1	Drug Scaffolds	0.52381	0.88197	4	0.46153
O=C1N=CNC2=C1N[C@@H](CNc1ccccc1)CN2	1	Drug Scaffolds	0.63158	0.73783	3	0.46137
C([C@H](c1ccccc1)Nc1ncnc2ccccc12)N1CCC1	1	Drug Scaffolds	0.47826	0.74882	4	0.46135
O=C(Cc1ccccc1)N1CC(CCN2CCCCC2)(c2ccccc2)OCC1	1	Drug Scaffolds	0.51724	0.75329	4	0.46099
O=C(CCCCOC(C[C@H](C[C@H](CC1)O[C@@H]2OCCCC2)O[C@@H]2OCCCC2)=O)[C@@]11OC1	1	Drug Scaffolds	0.40625	0.72502	3	0.46098
O=C(C(c1ccc[s]1)c1ccc[s]1)O[C@H](C1)C[C@@H]2[NH2+][C@H]1[C@H]1O[C@@H]21	1	Drug Scaffolds	0.47826	0.81291	7	0.46093
c(cc1)cc2c1NN=CC=C2	1	Drug Scaffolds	0.54545	0.6307	2	0.46083
O=C1c(cccc2)c2OC1(CC1)C=CC1=O	1	Drug Scaffolds	0.5625	0.80343	3	0.46081
C1NCSC1	1	Drug Scaffolds	0.6	0.80472	1	0.4607
O=C(CCc1ccc[s]1)O[C@@H](CC(C1)[C@H]([C@H](C2[C@@H](CC3)OC2)C3C2=O)OC(c3ccccc3)=O)C=C1[C@H]2OC(C1CCCC1)=O	1	Drug Scaffolds	0.37778	0.87805	6	0.46065
O=C(CCC1[C@@H](C2)N(CC3CC3)CC3)C[C@]13c1c2cccc1	1	Drug Scaffolds	0.45455	0.81997	5	0.46061
O=C(CC1)C(CCC2C(CCCC3)C3=C3)C1C2C3=O	1	Drug Scaffolds	0.52632	0.69203	4	0.46031
O=C(c1ccncc1)c(cccc1)c1NS(c1ccccc1)(=O)=O	1	Drug Scaffolds	0.54167	0.73199	3	0.45981
C(C1=CCc2c1cccc2)c1ncccc1	1	Drug Scaffolds	0.625	0.69754	3	0.4598
C(C1)[C@]23c(cc(C(C[C@@H](C4)C=CCN4CC4)c5c4c(cccc4)c4[nH]5)cc4)c4N[C@H]2CCC2C=CCN1[C@H]32	1	Drug Scaffolds	0.36842	0.94225	8	0.45979
c1n[n]2c(Nc3ccccc3)ccnc2n1	1	Drug Scaffolds	0.5625	0.72232	3	0.45974
O=C(CC1(CC(C2)C3)CC3CC2C1)N1[C@@H](C2)[C@@H]2CC1	1	Drug Scaffolds	0.47368	0.62778	7	0.45974
O=C1Oc(c(N2CCNCC2)ccc2)c2N1	1	Drug Scaffolds	0.5625	0.71675	3	0.45967
O=C(C[C@@H]1CCC2)O[C@@H]3OC4OO[C@]13[C@H]2CC4	1	Drug Scaffolds	0.41176	0.85231	5	0.45961
O=C1C=C(CC[C@@H]2[C@@H]3CCC4C5OCO[C@@H]5C[C@@H]24)C3C=C1	1	Drug Scaffolds	0.57143	0.74806	5	0.45959
O=C1N=CC=CN1C1OCCC1	3	Drug Scaffolds	0.58333	0.71278	2	0.45955
O=C(CC/C=C/C=C/CNC(/C=C/CCOC([C@@H](CCC1)N1C1=O)=O)=O)Cc2nc1c[o]2	1	Drug Scaffolds	0.4375	0.79438	2	0.45943
C(CC1CCCCC1)[C@@H](c1c2cccc1)[n]1c-2cnc1	1	Drug Scaffolds	0.55	0.8075	4	0.45938
O=C(C=CN12)N=C1O[C@@H]1[C@H]2OCC1	1	Drug Scaffolds	0.61538	0.78589	3	0.4593
O=S(CCN(C1)c2nc3ccccc3c(NCC3COC3)n2)(c2c1cccc2)=O	1	Drug Scaffolds	0.48276	0.83271	5	0.45928
C(COCC1)N1[n+]1n[o]cc1	1	Drug Scaffolds	0.63636	0.56687	2	0.45918
O=C1NOCC1	1	Drug Scaffolds	0.66667	0.69315	1	0.45909
C(CCCCC[P+](c1ccccc1)(c1ccccc1)c1ccccc1)CCCCc1ccccc1	1	Drug Scaffolds	0.54286	0.59188	4	0.45904
O=C1CCCC1	8	Drug Scaffolds	0.66667	0.3662	1	0.45849
C(C1CNCCC1)N1c(cccc2)c2Sc2c1cccc2	1	Drug Scaffolds	0.47619	0.70898	4	0.458
C(CNCC1)C1c(cccc1)c1Sc1ccccc1	1	Drug Scaffolds	0.57895	0.63634	3	0.45781
C([C@@H]1c2ccccc2)=COc2c1cccc2	1	Drug Scaffolds	0.5625	0.67407	3	0.45756
O=C(C[C@@]1(C(N(Cc2ccccc2)C2=O)=O)[n]3c2ccc3)NC1=O	1	Drug Scaffolds	0.45833	0.88866	4	0.45744
O=C(c1c(Nc2ccccc2)nccc1)OC(c1c2cccc1)OC2=O	1	Drug Scaffolds	0.53846	0.78935	4	0.45713
O=C([C@@H](C1)[C@@]1(COc1cncnc1)c1ccccc1)Nc1ncccc1	1	Drug Scaffolds	0.53846	0.76043	4	0.45695
O=C(c1cc2ccccc2nc1)N(Cc1ccccc1)Cc1ccccc1	1	Drug Scaffolds	0.48148	0.69969	4	0.45686
O=C([C@](C1)([C@H]1/C=C\CCCCC[C@H](C(N(C1)[C@@H]2C[C@@H]1Oc1nc3ccccc3c3ccccc13)=O)NC(c1nccnc1)=O)NC2=O)NS(C1CC1)(=O)=O	1	Drug Scaffolds	0.33333	0.92172	7	0.45671
O=C([C@@](C1)([C@@H]1/C=C\CCCCC[C@@H](C(N(C1)[C@H]2C[C@H]1Oc1nc3ccccc3c3ccccc13)=O)NC(c1nccnc1)=O)NC2=O)NS(C1CC1)(=O)=O	1	Drug Scaffolds	0.33333	0.92833	7	0.45669
O=C([C@H](CC[C@H](C1)N2)N1C2=O)NC1CCNCC1	1	Drug Scaffolds	0.55556	0.75474	4	0.45615
C(c1nnc(cc2)[n]1nc2-c1c[nH]nc1)c1cc2cccnc2cc1	1	Drug Scaffolds	0.56	0.82582	5	0.45609
O=C(C1CCCCC1)Oc(cccc1)c1C(OCc1ccccc1)=O	1	Drug Scaffolds	0.6	0.70181	3	0.45598
O=C1c(cccc2-c3ccccc3)c2OC([NH+]2CCOCC2)=C1	1	Drug Scaffolds	0.52174	0.80899	4	0.45598
C(C(C[n]1ncnc1)c1ccccc1)[n]1ncnc1	1	Drug Scaffolds	0.47368	0.59188	3	0.45583
C(C1NCCc2c1cccc2)c1ccccc1	2	Drug Scaffolds	0.58824	0.66621	3	0.45572
O=C1NC=Cc2c1cccc2[C@@H](c1c[n](C2(C3)CC3C2)nn1)Nc1cc2cccnc2cc1	1	Drug Scaffolds	0.42424	0.88286	8	0.45553
O=C(c(cc1-c2ccccc2)n[n]1-c1ccnc2ccccc12)NC1C2CC(C3)CC1CC3C2	1	Drug Scaffolds	0.44118	0.86791	8	0.45552
O=C(c1ccccc1)NCC1(CC(C2)C3)CC3CC2C1	1	Drug Scaffolds	0.55	0.57248	5	0.45542
O=C(C1=CNC=CC1c1ccccc1)OCCNCc1ccccc1	1	Drug Scaffolds	0.64	0.70798	3	0.45541
O=C(C[C@H](C1)O[C@@H]2OCCCC2)OCC[C@@H](C2)OCN[C@H]2CCC[C@@H]1O[C@@H]1OCCCC1	1	Drug Scaffolds	0.4375	0.70997	3	0.4554
C(C[C@@H]1C2)[C@@H]2c2c1[n](-c1ccccc1)nc2	1	Drug Scaffolds	0.5625	0.81096	5	0.45535
O=C(CNC(OC1CCCC1)=O)N(C[C@@H](C1)Oc2cc(-c3c[s]cn3)nc3ccccc23)[C@@H]1C(NC1CC1)=O	1	Drug Scaffolds	0.46154	0.87527	6	0.45532
C(CN(CC1)CCN1[C@@H](c1c([C@H]2[C@@H]3C2)cccc1)c1c3cccc1)COc1cccc2ncccc12	1	Drug Scaffolds	0.5	0.83726	7	0.45527
O=C(Nc1c2cccc1)OC2C#CC1CC1	1	Drug Scaffolds	0.5625	0.72502	3	0.45513
O=C1NC=Nc2c1c(CCc1ccccc1)c[nH]2	1	Drug Scaffolds	0.61111	0.76319	3	0.45507
O=C1N(Cc(cc2)ccc2-c(cccc2)c2-c2nnn[nH]2)c2ncncc2CC1	1	Drug Scaffolds	0.51724	0.83271	5	0.45497
O=C1O[C@H]([C@@H]2NCCc3c2cc2OCOc2c3)c2c1cccc2	1	Drug Scaffolds	0.47826	0.86289	5	0.45483
C1OC2(CCCCC2)OC1	2	Drug Scaffolds	0.6	0.55452	2	0.45476
C(C(c1ccccc1)c1ccccc1)c1ccccc1	1	Drug Scaffolds	0.5	0.51966	3	0.45459
O=C(c(cccc1)c1N=C1CNc2ncnc3c2[nH]cn3)N1c1ccccc1	1	Drug Scaffolds	0.42857	0.86255	5	0.45447
O=C(CC1c2c[nH]c3c2cccc3)NC1=O	1	Drug Scaffolds	0.5625	0.77749	3	0.45428
C(C1CNCC1)N1c(cccc2)c2Sc2c1cccc2	1	Drug Scaffolds	0.45	0.70492	4	0.45396
O=C(CC1)O[C@@]1([C@@H]1[C@H]2C1)C(CC1)[C@@H]2[C@H]([C@@H]2[C@H]3C2)[C@H]1C(CC1)C3=CC1=O	1	Drug Scaffolds	0.52	0.77933	9	0.45359
C=C1[C@@H](CC2)[C@H]2CC/C=C/CC1	1	Drug Scaffolds	0.5	0.54302	1	0.45354
S=C1NC(Cc2ccccc2)=CN1	1	Drug Scaffolds	0.69231	0.53051	2	0.45322
O=C(C=C(N1Cc2ccccc2)N2CCCCC2)NC1=O	4	Drug Scaffolds	0.52381	0.75032	3	0.45318
C(Cc1ccccc1)[C@@H]1N(Cc2ccccc2)CCc2c1cccc2	1	Drug Scaffolds	0.52	0.72141	4	0.45315
C(C1c2c(C3)cccc2)N=CN1c1c3cccc1	1	Drug Scaffolds	0.44444	0.80548	4	0.45302
O=S(c1ccccc1)(Nc1ccn[n]1-c1ccccc1)=O	1	Drug Scaffolds	0.57143	0.7268	3	0.45294
C=C(CCC1)[C@H]1[n]1c(N=CNC2=O)c2nc1	1	Drug Scaffolds	0.5	0.79764	3	0.45286
O=C(c1c(N2Cc3ccccc3)[s]c(-c3ccccc3)c1CNCc1ccccc1)N(c1ccccc1)C2=O	1	Drug Scaffolds	0.41026	0.95583	6	0.45258
C(Cc1ccccc1)c1ccccc1	7	Drug Scaffolds	0.71429	0.35499	2	0.45251
O=S(NCCC1)(N1c1cc2ccncc2cc1)=O	1	Drug Scaffolds	0.55556	0.70075	3	0.45248
C(C1)CO[C@H]1[n]1c2ncncc2nc1	17	Drug Scaffolds	0.57143	0.76182	3	0.45238
C(COc1c2O[C@@H](CC=C[C@H]3[C@@H](C4)NCC5)[C@]35c2c4cc1)N1CCOCC1	1	Drug Scaffolds	0.51852	0.92897	6	0.45205
O=C1Nc(cccc2)c2Nc2c1cccc2	3	Drug Scaffolds	0.5	0.72323	3	0.45198
C(C(C1CCCCC1)C1CCCCC1)C1NCCCC1	1	Drug Scaffolds	0.5	0.50791	3	0.45195
O=C([C@H](C[C@H](C1)OC(N(C2)Cc3c2cccc3CCCCCCOC(NC2)=O)=O)N1C2=O)NC1(CC1)C(NS(C1CC1)(=O)=O)=O	1	Drug Scaffolds	0.42222	0.87987	5	0.45187
C(C1)CC=C[C@H]1c1ccccc1	2	Drug Scaffolds	0.66667	0.58275	2	0.45186
O=C(c([nH]cc1)c1N1Cc2ccccc2)NC1=S	1	Drug Scaffolds	0.55556	0.79818	3	0.45181
O=C(CN(CCN(CC(N1)=O)CC1=O)C1)NC1=O	1	Drug Scaffolds	0.55556	0.45401	2	0.4518
O=C(C(CCC1)N1c(nc1Nc2cc(C3CC3)n[nH]2)n[n]2c1ccc2)Nc1cnccc1	1	Drug Scaffolds	0.53125	0.88979	6	0.45158
O=C([C@@H](Cc(cc1)cc2c1[nH]nc2)NC(N(CC1)CCC1(c1c(N2)nccc1)OC2=O)=O)N[C@@H](CC1CCNCC1)C(N(CC1)CCN1c1ccncc1)=O	1	Drug Scaffolds	0.41818	0.90999	8	0.45153
O=S(c1ccccc1)(N[C@H](CCc1c2)C[n]1c1c2cccc1)=O	1	Drug Scaffolds	0.56522	0.80446	4	0.45152
c([nH]c1c2cccc1)c2Sc1ccccc1	1	Drug Scaffolds	0.625	0.68153	3	0.45146
C(C1=NCCN1)c1ccccc1	3	Drug Scaffolds	0.66667	0.54931	2	0.45123
O=C(C1[C@H](CC2)O[C@H]2C1)N1CCNCC1	1	Drug Scaffolds	0.6	0.70285	4	0.45114
C(c1ccccc1)N(c1nccnc1)c1nccnc1	1	Drug Scaffolds	0.5	0.65205	3	0.45095
C(C(C[n]1ncnc1)c1ccccc1)c1ncncc1	1	Drug Scaffolds	0.5	0.68511	3	0.45093
C1N=C(c2ccccc2)c(cccc2)c2-c2c1cnc(Nc1ccccc1)n2	2	Drug Scaffolds	0.53571	0.85376	5	0.45082
O=C([C@@H](CCC1)Nc2ccccc2)N1[C@H](CCC1)CN1c1ncncc1	1	Drug Scaffolds	0.57692	0.75402	4	0.4508
O=C(/C=C/c1ccccc1)NC[C@@H](c1c(C2)ccc3c1OCO3)N1[C@@H]2[C@@H](c2c(C3)cccc2)N[C@@H]3C1	1	Drug Scaffolds	0.47222	0.898	7	0.45066
C(CC1)CCC1=C(c1ccccc1)c1ccccc1	2	Drug Scaffolds	0.47368	0.62054	3	0.45056
C(C[C@H]1c2ccccc2)Cc2c1cccc2	2	Drug Scaffolds	0.5625	0.64283	3	0.45054
O=C(c(cccc1)c1C=C1CNc2ncnc3c2[nH]cn3)N1c1ccccc1	1	Drug Scaffolds	0.42857	0.86187	5	0.45038
O=C1C2=CC=CC2=CC2(CC2)C1	1	Drug Scaffolds	0.5	0.70997	3	0.45031
O=C(C=CN1C2OCCC2)NC1=O	5	Drug Scaffolds	0.61538	0.69315	2	0.45023
C(CNCC1)C1OC(c1ccccc1)c1ccccc1	1	Drug Scaffolds	0.5	0.56169	3	0.45018
C1Nc(cccc2)c2C(c2ccccc2)=NC1	1	Drug Scaffolds	0.52941	0.70492	3	0.45007
O=C([C@@](C1)(CN(CC2)S(c3n[nH]nc3)(=O)=O)[C@@H]2Cc2c1cn[n]2-c1ccccc1)c1ncccc1	1	Drug Scaffolds	0.42857	0.93566	6	0.45003
C(c1ccccc1)[n]1c(cccc2)c2c2c1CCC2	1	Drug Scaffolds	0.52632	0.8236	4	0.44937
O=S(c1ccccc1)(NC(CC1)Cc2c1[nH]c1c2cccc1)=O	1	Drug Scaffolds	0.56522	0.81859	4	0.4492
O=S(c1ccccc1)([n]1c(-c2ccccc2)ccc1)=O	1	Drug Scaffolds	0.55	0.73452	3	0.44914
C(C1)NCC(c2c(C3)cccc2)N1c1c3cccc1	1	Drug Scaffolds	0.42105	0.79764	4	0.44885
O=C1OC(C2)[C@@]1(C[C@@H]1C=CCCC1)NC2=O	1	Drug Scaffolds	0.5625	0.81435	4	0.44882
O=C1[C@@]23C=CCC2CC=C[C@H]1[C@H](C1)[C@H]1CC3	2	Drug Scaffolds	0.4375	0.71389	4	0.44858
O=C(NCc1ccccc1)N([C@@H](CN1Cc2nc(N(C3)CC3N3CCNCC3)ccc2)N2[C@@H](Cc3ccccc3)C1=O)NCC2=O	1	Drug Scaffolds	0.47826	0.909	7	0.44854
C(CC1)CC[C@]11OO[C@]2(C3CC(C4)CC2CC4C3)O1	1	Drug Scaffolds	0.52632	0.73618	6	0.44832
O=C(C=CN1[C@@H]2O[C@H](CO[P@H](Oc3ccccc3)=O)CC2)NC1=O	1	Drug Scaffolds	0.66667	0.75903	3	0.44831
O=C([C@H]([C@@H]1c2c[n]3c4c2cccc4CCC3)c2c[nH]c3c2cccc3)NC1=O	1	Drug Scaffolds	0.42857	0.87957	6	0.44822
O=C(C(C1CCCC1)c1ccccc1)OC1C[NH2+]CC1	1	Drug Scaffolds	0.5	0.68976	3	0.44775
O=C(C1CCCCC1)N[C@@H](CCN([C@H](CC1)C2)[C@@H]1C[C@@H]2[n]1cnnc1)c1ccccc1	1	Drug Scaffolds	0.51613	0.73284	6	0.44774
O=C(C=C1)C=C(CCCCCCCCCC[P+](c2ccccc2)(c2ccccc2)c2ccccc2)C1=O	1	Drug Scaffolds	0.51351	0.66485	4	0.44769
C(c1ccccc1)[n]1c(cccc2)c2c2c1CCNC2	1	Drug Scaffolds	0.5	0.82973	4	0.4472
O=C1N=CC=CN1[C@H]1OCCC1	1	Drug Scaffolds	0.58333	0.71278	2	0.44719
O=C1C=C(C(CCC2)C2CC2)[C@H]2C2[C@H]1CCCC2	1	Drug Scaffolds	0.5	0.73114	4	0.44719
C(C1)COC1[n]1ncnc1	1	Drug Scaffolds	0.6	0.72218	2	0.44706
C(c1ccccc1)c1ncccc1	6	Drug Scaffolds	0.69231	0.50377	2	0.44701
O=C(CNC1(CC(C2)C3)CC3CC2C1)N1CCCC1	1	Drug Scaffolds	0.52632	0.58006	5	0.44679
O=C1Nc([s]cc2)c2C(c2ccccc2)=NC1	1	Drug Scaffolds	0.52941	0.77749	3	0.44663
C(CNCC1)c2c1[s]cn2	1	Drug Scaffolds	0.6	0.72752	2	0.44651
O=C(CC1)C(CC2)[C@@H]1[C@H]1[C@H]2C(CCCC2)[C@H]2CC1	1	Drug Scaffolds	0.55556	0.55303	4	0.44649
C(C1)COC1(c1ccccc1)c1ccccc1	1	Drug Scaffolds	0.52941	0.62778	3	0.44644
C(COC1)[C@@H]1O[C@@H]1OCCCC1	1	Drug Scaffolds	0.66667	0.60182	2	0.4464
C(Cc1c([C@@H]23)cccc1)[C@@H]2NCCc1c3cccc1	1	Drug Scaffolds	0.47368	0.75973	4	0.44638
O=C(CNS(c1c2NCCCc2ccc1)(=O)=O)N1CCCCC1	1	Drug Scaffolds	0.56522	0.78235	3	0.44614
c(nc1)c(-c2ccccc2)[n]1-c1ccccc1	1	Drug Scaffolds	0.58824	0.67908	3	0.44604
C1c2cccnc2O[C@@]11C(CC2)CCN2C1	1	Drug Scaffolds	0.5	0.81719	5	0.44595
C(CCC[NH2+]C1c(cccc2)c2-c2c1cccc2)CC[NH2+]C1c(cccc2)c2-c2c1cccc2	1	Drug Scaffolds	0.52941	0.71292	6	0.44585
O=C(Cc1ccccc1)O[C@@H](C1)C[C@@H]2N[C@H]1[C@H]1O[C@@H]21	1	Drug Scaffolds	0.63158	0.75761	6	0.44582
O=C(c1cnccc1)O[C@H]1C=C[C@@H]([C@@H](Cc2ccc3)NCC4)[C@]44c2c3O[C@@H]14	1	Drug Scaffolds	0.44444	0.95441	6	0.44562
O=C(Nc(cn[n]1cc2)c1nc2N(CCC1)[C@H]1c1ccccc1)N1CCCC1	1	Drug Scaffolds	0.53571	0.85083	5	0.44559
C1=NNC(c2ccccc2)S1	1	Drug Scaffolds	0.63636	0.56687	2	0.44558
O=C(CN1)N(CCC2)[C@@H]2C1=O	1	Drug Scaffolds	0.54545	0.67959	2	0.44558
O=C([C@H](Cc1cnc[nH]1)NC([C@H](CC(N1)=O)NC1=O)=O)N1CCCC1	1	Drug Scaffolds	0.44	0.75832	3	0.44555
C(C1=NCCN1)c1cccc2ccccc12	1	Drug Scaffolds	0.5625	0.61095	3	0.44529
C(CC1)CCC1c1c(-c(cccc2)c2OCCC2)[n]2c2c1cccc2	1	Drug Scaffolds	0.4	0.89504	4	0.44526
O=C(CC1(CCNCC1)c1ccccc1)NCc1cccc2ccccc12	1	Drug Scaffolds	0.51852	0.67534	4	0.44521
O=C(Cc1ccccc1)OC(C1)CC2NC1C1OC21	1	Drug Scaffolds	0.63158	0.69536	6	0.4452
O=C1C(Cc2ccccc2)CCC1	1	Drug Scaffolds	0.61538	0.50377	2	0.44519
O=C([C@H](C1)[C@]1(COc1cncnc1)c1ccccc1)Nc1ncccc1	1	Drug Scaffolds	0.53846	0.77052	4	0.44499
O=C(c1c[nH]c2c1cccc2)O[C@@H]1C[C@H](CC(C2)C(C3)=O)N3[C@H]2C1	1	Drug Scaffolds	0.58333	0.8218	6	0.44494
O=C(c1nc(NCC(c2ccccc2)c2ccccc2)c2nc[n]([C@@H]3OCCC3)c2n1)NCCNC(NC(CC1)CCN1c1ncccc1)=O	1	Drug Scaffolds	0.5	0.87866	7	0.44485
O=C([C@@H]1NCCC1)NC[C@@H]1OCCCC1	3	Drug Scaffolds	0.66667	0.58251	2	0.44472
C(C1)COC1[n]1c2ncncc2nc1	1	Drug Scaffolds	0.57143	0.76182	3	0.44449
O=C(C(c1ccccc1)c1ccccc1)OC1CCNCC1	3	Drug Scaffolds	0.5	0.60895	3	0.44432
O=C1OC(COC(CC(C[C@H](CCCC(C2)=O)O[C@@H]3OCCCC3)=O)=O)[C@@H]2N1CCCC[n]1cnc(-c2cnccc2)c1	1	Drug Scaffolds	0.55814	0.85046	4	0.44431
O=C(CC1)O[C@@]1(CC1)C2[C@@H]1[C@H](CCC(C1CC3)=CC3=O)[C@@]11O[C@@H]1C2	1	Drug Scaffolds	0.54167	0.8512	7	0.44413
O=C1OC[C@H](Cc2cnc[nH]2)C1	1	Drug Scaffolds	0.66667	0.6307	2	0.4441
O=C(c(cc1)cc(NC(c2c3cccc2)=O)c1S3(=O)=O)NCc1cnc[s]1	1	Drug Scaffolds	0.51852	0.84362	4	0.44406
C(C(C1)Oc(cccc2)c2-c(cc2)cc3c2[nH]nc3)c2c1cccc2	1	Drug Scaffolds	0.52	0.76251	5	0.4439
O=S(c(cccc1)c1-c1ccccc1)(N1CCCC1)=O	1	Drug Scaffolds	0.5	0.72049	3	0.44374
O=C(C1CCCCC1)N(CC1)[C@H](CCc2c3cccc2)[C@@]13S(c1ccccc1)(=O)=O	1	Drug Scaffolds	0.43333	0.94128	5	0.44359
O=C(c1c[nH]c2c1cccc2)O[C@@H]1C[C@H](C[C@@H](C2)C(C3)=O)N3[C@H]2C1	1	Drug Scaffolds	0.58333	0.82714	6	0.4435
C(CC1)CN1c1ncncc1	1	Drug Scaffolds	0.63636	0.58275	2	0.44344
O=C1N=CNC2=C1NC(CNc1ccccc1)CN2	1	Drug Scaffolds	0.63158	0.73284	3	0.44342
O=C1NC=Nc2cccc(Sc3ccncc3)c12	1	Drug Scaffolds	0.55556	0.75832	3	0.44339
C=C1[C@H](N(C=CC=N2)C2=O)OCC1	1	Drug Scaffolds	0.53846	0.70075	2	0.44316
O=S(c1ccccc1)(c(cc1)cnc1-c1nnc[o]1)=O	1	Drug Scaffolds	0.6	0.73369	3	0.443
O=C(C1=CNC=CC1c1ccccc1)OC(C1)CN1C(c1ccccc1)c1ccccc1	1	Drug Scaffolds	0.5	0.75761	5	0.44295
O=[P@@H](COCC[n]1c2ncncc2nc1)Oc1ccccc1	1	Drug Scaffolds	0.68182	0.70285	3	0.44273
O=C(N1c(nccc2)c2Sc2c1cccc2)OCCOCCN1CCCCC1	1	Drug Scaffolds	0.57143	0.8267	4	0.44255
C(C1CCCCCC1)c1ccccc1	1	Drug Scaffolds	0.64286	0.45401	2	0.4425
O=C1C2O[C@H](CCCC3)[C@@H]3O[C@@H]2OCC1	1	Drug Scaffolds	0.53333	0.73701	3	0.44245
O=C1C(c2ccccc2)=C(CNc2ncnc3c2nc[nH]3)Oc2c1cccc2	1	Drug Scaffolds	0.42857	0.86425	5	0.44216
O=C(CC1)N[C@@H]1c1cnccc1	1	Drug Scaffolds	0.66667	0.67959	2	0.44215
O=C(N[C@@H](CCNS(c1ccccc1)(=O)=O)Cc1ccccc1)O[C@H]1[C@@H](CCO2)[C@@H]2OC1	1	Drug Scaffolds	0.5	0.75761	4	0.44209
C(C1)C1(c1nnc2[n]1cccc2)c1ccccc1	1	Drug Scaffolds	0.55556	0.77872	4	0.44182
O=C(CNC([C@H](Cc1c[nH]cn1)NC(Nc(cc1)ccc1O[C@H]1OCCCC1)=S)=O)OC(C(C=C1N2Cc3cc4ccccc4nc13)=C(CO1)C2=O)C1=O	1	Drug Scaffolds	0.51852	0.9916	8	0.44138
O=S(c1ccccc1)([n]1c(cccc2)c2c(CN2CCNCC2)c1)=O	1	Drug Scaffolds	0.52	0.83229	4	0.44124
C(CN1CCCC1)N(Cc1ccccc1)c1ccccc1	2	Drug Scaffolds	0.52381	0.59188	3	0.44118
O=C(C1CCCCC1)Oc1ccccc1	1	Drug Scaffolds	0.66667	0.52337	2	0.44108
C(C1)CO[C@H]1O[C@H]1OCCCC1	2	Drug Scaffolds	0.66667	0.56122	2	0.441
C(c1ccccc1)c1nccc2ccccc12	3	Drug Scaffolds	0.58824	0.65205	3	0.44099
c(cc1)ccc1-c1nccnc1-c1ccccc1	1	Drug Scaffolds	0.55556	0.61292	3	0.44098
C(COCc1ccccc1)[N+](CC1)(CC2)CCC12C(c1ccccc1)c1ccccc1	1	Drug Scaffolds	0.54839	0.64123	6	0.44095
C(C[NH2+]CC1)C1=C(c1ccccc1)c1ccccc1	1	Drug Scaffolds	0.47368	0.62054	3	0.44091
C(C1)CN1c1ncn[n]2c1c(-c1c(-c3ncccc3)[nH]nc1)nc2	1	Drug Scaffolds	0.5	0.92284	5	0.4408
O=C1N(Cc2ccccc2)[C@H](Cc2ccccc2)[C@@H]2O[C@H]1CO2	1	Drug Scaffolds	0.52174	0.79273	5	0.44038
C(CNC1)C(c2c(C3)cccc2)=C1c1c3cccc1	1	Drug Scaffolds	0.42105	0.77933	4	0.44034
O=C(NN=C1c2ccccc2)N1c(cc1)cc2c1[nH]cc2	1	Drug Scaffolds	0.52381	0.79105	4	0.44026
O=C(c1cccc(CC(c2c3cccc2)=NNC3=O)c1)N1Cc2ncn[n]2CC1	1	Drug Scaffolds	0.51724	0.8267	5	0.44004
C([C@H](CC1)C[C@@H]2N1CCc1c2cccc1)[C@H]1NCCc2c1cccc2	1	Drug Scaffolds	0.52	0.73199	5	0.44
O=C(Cc1ccccc1)OC(C1)C[C@@H]2[NH2+][C@H]1[C@H]1O[C@@H]21	1	Drug Scaffolds	0.63158	0.7569	6	0.43995
c(cc1)ccc1-c1cccnc1-c1cnccc1	1	Drug Scaffolds	0.55556	0.72049	3	0.43983
C1NC(C2Oc(cccc3)c3OC2)=NC1	1	Drug Scaffolds	0.6	0.68861	3	0.43983
c(cc1)ccc1Sc1ccccc1	3	Drug Scaffolds	0.69231	0.34256	2	0.43979
O=S(c1ccccc1)(Nc1ccn[o]1)=O	2	Drug Scaffolds	0.6	0.60067	2	0.43971
C(C1NCCCC1)c1ccnc2ccccc12	1	Drug Scaffolds	0.58824	0.69536	3	0.43963
C=C(NC1=O)SC1N1CCCCC1	1	Drug Scaffolds	0.61538	0.61868	2	0.43946
C(CNCC1)c2c1cccc2	1	Drug Scaffolds	0.54545	0.52258	2	0.43937
C1OCO[C@H]1[n]1c2ncncc2nc1	1	Drug Scaffolds	0.57143	0.76182	3	0.43892
O=C(C1)Nc(cccc2)c2S[C@H]1c1ccccc1	1	Drug Scaffolds	0.55556	0.72232	3	0.43884
N=C(C=CN1[C@@H]2OCCC2)NC1=O	1	Drug Scaffolds	0.61538	0.69315	2	0.4388
O=S1(NC(CC2CCCC2)Nc2c1cccc2)=O	1	Drug Scaffolds	0.55556	0.74499	3	0.43867
O=C(C1)Nc(cccc2)c2N(c2ccccc2)C1=O	1	Drug Scaffolds	0.47368	0.69536	3	0.43859
O=S(c1c(-c(cc2)ccc2-c2nnc[o]2)nccc1)(Nc1nccnc1)=O	1	Drug Scaffolds	0.55556	0.80649	4	0.43851
C(COc1ccccc1)N1CC(CNC2)OC2C1	1	Drug Scaffolds	0.66667	0.54381	3	0.43832
O=C(C12CC1)N(Cc1nc(cccc3)c3[nH]1)c1c2cccc1	1	Drug Scaffolds	0.5	0.84008	5	0.4383
C([C@@H]1OCCNC1)c1c(-c2ccccc2)nc2[n]1cccc2	1	Drug Scaffolds	0.5	0.84127	4	0.43824
C(c1cnccc1)N(CC1)CCC1=C1c2ncccc2CCc2c1cccc2	1	Drug Scaffolds	0.5	0.85557	5	0.43823
O=S(c(cc1)cc2c1nc[s]2)([n](cc1)c2c1cccc2)=O	1	Drug Scaffolds	0.52381	0.80949	4	0.43817
O=C(C1CCCCC1)N(C1CCCCC1)c1c[s]c(-c2ccccc2)c1	1	Drug Scaffolds	0.5	0.76455	4	0.43811
O=C([C@@H](C1CCCC1)c1ccccc1)O[C@H]1C[NH2+]CC1	1	Drug Scaffolds	0.5	0.68976	3	0.43809
O=C(CCc1ccccc1)N[C@@H](Cc1c[nH]cn1)C(N[C@H](CCC1CC1)CC1CCCCC1)=O	1	Drug Scaffolds	0.5	0.7268	4	0.43792
O=C(C=C1NC(/C=C/C=C\CCC/C=C/CCCCCC2)=O)C(NCCCCCC[P+](c3ccccc3)(c3ccccc3)c3ccccc3)=C2C1=O	1	Drug Scaffolds	0.46154	0.82714	4	0.43777
O=C(C=CN1C2OCC=C2)NC1=O	1	Drug Scaffolds	0.61538	0.6909	2	0.43766
O=C1NCCC1	9	Drug Scaffolds	0.66667	0.59725	1	0.4375
O=C(c1ccccc1)NCC1NCCC1	6	Drug Scaffolds	0.66667	0.54381	2	0.43738
C(CC1)CCN1c1c(cc[nH]2)c2ccc1	1	Drug Scaffolds	0.53333	0.67908	3	0.43718
O=C(c1c2[n](Cc(cc3)ccc3-c(cccc3)c3-c3n[nH]nn3)cnc2ccc1)OCOC(OC1CCCCC1)=O	1	Drug Scaffolds	0.56098	0.87019	6	0.4371
O=C(C(CC1[C@]23CCN(CC4CC4)[C@@H]1C1)=C[C@@H]2Oc2c3c1ccc2)NCc1nc(-c2ccccc2)n[o]1	1	Drug Scaffolds	0.48649	0.96742	8	0.43703
C(C1)CC1[n]1c(nc(cc2)Oc3ccccc3)c2nc1	1	Drug Scaffolds	0.6	0.78175	4	0.43699
O=C(CNC1(CC2)CCC2CC1)N1CCCC1	1	Drug Scaffolds	0.58824	0.55303	4	0.43693
C(C1NCCCC1)c1ccccc1	1	Drug Scaffolds	0.69231	0.51193	2	0.43682
C(CC1)CN1c1nc(Nc2c[nH]nc2)c2nc[nH]c2n1	1	Drug Scaffolds	0.5	0.77499	4	0.43678
C(C1)COC1OC1OCCCC1	1	Drug Scaffolds	0.66667	0.56122	2	0.43672
O=C(Cc1ccccc1)OCC(CC([C@H]1C=C2)C2=O)=C[C@@H]2[C@@]1(CC1)O[C@]3(Cc4ccccc4)O[C@H]2C1O3	1	Drug Scaffolds	0.51351	0.9183	9	0.43667
N=C(CCC([C@@H](CC(CC(OCC1)=O)=O)O[C@@H]2OCCCC2)OC2)C[C@H]1OC/C\2=N\OCc(cc1)cnc1-[n]1nccc1	1	Drug Scaffolds	0.46512	0.82801	3	0.43612
C(C1CCC1)N(CC1)[C@H](C2)C(CCCC3)[C@]13c1c2cccc1	1	Drug Scaffolds	0.5	0.79602	5	0.43603
O=C(CC[C@@H]1c2ccccc2)N[C@@H]1c1ccccc1	1	Drug Scaffolds	0.52632	0.71485	3	0.43584
O=S(c1ccc[s]1)(Nc1n[n](Cc2ccccc2)c2c1cccc2)=O	1	Drug Scaffolds	0.52	0.81859	4	0.43582
O=C(CC(N1C2CCCCC2)=O)NC1=O	1	Drug Scaffolds	0.6	0.6715	2	0.43578
O=C(CS[C@H]1C[C@H](CC2)N[C@H]2C1)O[C@H](CCCC[C@@]1(CC2)CCC3)C3[C@@H]1C2=O	1	Drug Scaffolds	0.46429	0.78413	5	0.43565
O=C1NN=CC(N2CCOCC2)=C1	1	Drug Scaffolds	0.61538	0.58006	2	0.43548
O=C(C1N(Cc2ccccc2)CCC2(CC2)C1)NC1(CC1)c1ccccc1	1	Drug Scaffolds	0.51852	0.74421	5	0.43531
O=C1N2C=C([C@H]3OCCC3)S[C@H]2C1	1	Drug Scaffolds	0.61538	0.74264	4	0.43523
c(nc[nH]1)c1Sc1ncnc2c1[nH]cn2	1	Drug Scaffolds	0.53333	0.74499	3	0.435
C1NCC1OC(c1ccccc1)c1ccccc1	1	Drug Scaffolds	0.5	0.54381	3	0.43498
C(c1ncccc1)[n]1c2ncncc2cc1	1	Drug Scaffolds	0.625	0.73114	3	0.43488
O=C1N=COC1c1ccccc1	2	Drug Scaffolds	0.58333	0.63444	2	0.43487
C(CC1)CN1c(cccc1)c1Oc1ccccc1	1	Drug Scaffolds	0.55556	0.63126	3	0.4348
C(c1ccccc1)N1CCCCC1	1	Drug Scaffolds	0.69231	0.44158	2	0.43459
C([C@H]1c2ccccc2)=CNc2c1cncc2	1	Drug Scaffolds	0.5625	0.71389	3	0.43457
O=S(c1ccccc1)(Nc1cc(-c2cccc3ccccc23)cc2ccccc12)=O	1	Drug Scaffolds	0.46667	0.74577	5	0.43442
O=C(CC[C@H]1NCCC1)N[C@@H](Cc1ccccc1)c1ncc[s]1	1	Drug Scaffolds	0.56522	0.70075	3	0.43428
S=C1Nc(cccc2)c2C(c2ccccc2)=NC1	1	Drug Scaffolds	0.5	0.73701	3	0.43427
C(c1c2cncc1)OC2c1ccccc1	1	Drug Scaffolds	0.6	0.69862	3	0.43397
O=C(Cc1ccccc1)N[C@@H]([C@H]1SCC=CN11)C1=O	5	Drug Scaffolds	0.63158	0.7569	3	0.43389
O=C(c1ccccc1)N([C@@H](C[n]1nccc1)CC1)[C@H]1c1ncc[s]1	1	Drug Scaffolds	0.45833	0.80899	4	0.4338
C(c1ccccc1)[n]1cncc1	4	Drug Scaffolds	0.66667	0.53648	2	0.43375
O=C(NCc1ccccc1)N(CC[C@@H](C1)N2CCNCC2)[C@H]1c1ccccc1	1	Drug Scaffolds	0.53571	0.74577	4	0.43375
O=C(C(C(c1ccccc1)=O)=C1Nc(cccc2)c2N1)c1ccccc1	1	Drug Scaffolds	0.42308	0.73783	4	0.43375
C(CNCC1)C11Oc(cccc2)c2C(c2ccccc2)=C1	2	Drug Scaffolds	0.47619	0.78354	4	0.43374
C(c1ccccc1)[n]1c(-c2ccccc2)ncc1	1	Drug Scaffolds	0.61111	0.626	3	0.43369
O=C1N(CCCN(CCCN2CCOCC2)Cc2ccccc2)c(ncnc2)c2N1	1	Drug Scaffolds	0.53333	0.75547	4	0.43352
O=C(c1c2cccc1)N(Cc1ccccc1)C2=O	2	Drug Scaffolds	0.55556	0.64283	3	0.43348
O=C(NC1CCCCC1)NS(c1ccccc1)(=O)=O	1	Drug Scaffolds	0.63158	0.60279	2	0.43309
C(c1cncnc1)[n+]1c[s]cc1	1	Drug Scaffolds	0.66667	0.54931	2	0.43299
O=C(c1n[nH]c2c1cccc2)N[C@@H]1C[C@H](CCC2)N[C@H]2C1	1	Drug Scaffolds	0.57143	0.76043	4	0.4327
O=C1OCC1	2	Drug Scaffolds	0.8	0.80472	1	0.43264
O=C(C(c1ccccc1)c1ccccc1)OC1C[NH2+]CCC1	1	Drug Scaffolds	0.5	0.63466	3	0.43251
O=C(C[C@@H]1CCC2C3[C@H]4[C@H](CCCC5)C5CC3)C=CC1C2=CC4=O	3	Drug Scaffolds	0.54167	0.75761	5	0.43232
C(Cc1c(C2)cccc1)c1c2cccc1	2	Drug Scaffolds	0.53333	0.57505	3	0.43231
O=C1NC([C@@H]2CN(Cc3ncccn3)CC2)=Nc2c1cn[n]2C1CCOCC1	1	Drug Scaffolds	0.57143	0.86791	5	0.43221
C(c1nc(cccc2)c2[nH]1)N[C@@H]1c2ncccc2CCC1	1	Drug Scaffolds	0.57143	0.78821	4	0.43221
C(CN1CCCCC1)C(C1CCCCC1)c1ccccc1	1	Drug Scaffolds	0.52381	0.60487	3	0.43216
O=C1C=C2C=C[C@@H]([C@H](CCC3)C3CC3)[C@@H]3C2C=C1	1	Drug Scaffolds	0.55556	0.70285	4	0.43181
C(C[n]1cncc1)C(c1ccccc1)c1ccccc1	1	Drug Scaffolds	0.5	0.55886	3	0.43167
O=S(c1ccccc1)(Nc1nc2ccccc2nc1Nc1ccccc1)=O	1	Drug Scaffolds	0.48148	0.77811	4	0.43161
O=C(NC1CCNCC1)NC1(CC(C2)C3)CC3CC2C1	1	Drug Scaffolds	0.55	0.58251	5	0.43151
C(C[C@@H]1OC1)[C@H]1OC1	1	Drug Scaffolds	0.75	0.48648	2	0.4315
N=C1N(CC(NC(N2)=O)=CC2=O)CCC1	1	Drug Scaffolds	0.53333	0.65205	2	0.43141
C(CN1CCCCC1)C(C1CCCC1)c1ccccc1	1	Drug Scaffolds	0.55	0.60279	3	0.43123
O=C(Cc1ccccc1)N(C1CCNCC1)c1ccccc1	1	Drug Scaffolds	0.5	0.66888	3	0.43118
O=C(N[C@@H]1[C@H](CC2)CC2C1)NS(c1ccccc1)(=O)=O	1	Drug Scaffolds	0.6	0.67019	4	0.43112
O=S(c1ccccc1)(Nc1nnc[s]1)=O	2	Drug Scaffolds	0.6	0.60067	2	0.43104
O=S(c1ccccc1)(Nc1n[o]cc1)=O	1	Drug Scaffolds	0.6	0.60067	2	0.431
c([o]nc1-c2ccccc2)c1-c1ccccc1	3	Drug Scaffolds	0.58824	0.67908	3	0.43097
O=C(C=CN1[C@H]2OCCC2)NC1=O	2	Drug Scaffolds	0.61538	0.69315	2	0.4309
O=S(c1ccccc1)(N[C@H](CC1)Cc2c1cccc2)=O	1	Drug Scaffolds	0.6	0.68745	3	0.43089
C([C@H](C[n]1ncnc1)c1ccccc1)c1ncncc1	1	Drug Scaffolds	0.5	0.68511	3	0.43082
O=C1C=C(CC[C@@H]([C@@H]2CC3)[C@@H]4CCC2[C@H]3OC2=CCCC2)C4C=C1	1	Drug Scaffolds	0.58333	0.73369	5	0.43076
C(c1ccccc1)[n]1ncnc1	1	Drug Scaffolds	0.66667	0.54931	2	0.43074
O=C1NC=Nc2c1[nH]cc2CN1CCCC1	1	Drug Scaffolds	0.5625	0.76182	3	0.4307
C(CNc1ncc2nc[n]([C@@H](CC3)O[C@@H]3c3n[nH]nn3)c2n1)c1ccccc1	1	Drug Scaffolds	0.60714	0.85083	5	0.43053
C(CNC1)C(c2c3cccc2)=C1C3c1ccccc1	1	Drug Scaffolds	0.47368	0.79924	4	0.43053
O=C(Nc1c(CCC2)c2cc2c1CCC2)NS(C1CCNCC1)(=O)=O	1	Drug Scaffolds	0.48	0.76856	4	0.43044
O=C(CN(c1c2cccc1)C(SCc1ccccc1)=CC2=O)N(Cc(cc1)ccc1-c1ccccc1)C1CCNCC1	1	Drug Scaffolds	0.47619	0.8598	6	0.43043
O=C(C1=CNC=CC1c1ccccc1)OCCNCCC(c1ccccc1)c1ccccc1	1	Drug Scaffolds	0.54545	0.72413	4	0.43021
C([C@@H](CC1)Oc2c1cccc2)NCc1cncc(-c2ccccc2)c1	1	Drug Scaffolds	0.64	0.73536	4	0.42997
C(c1ccccc1)c1ncncc1	1	Drug Scaffolds	0.69231	0.51193	2	0.42977
C=C(C1)CC(C/C=C/[C@@H](CC(C2)=C)O[C@@H]2CC(CCC2)O[C@@H]2CCC2)O[C@@H]1CCOC2=O	1	Drug Scaffolds	0.4375	0.70285	3	0.42974
O=C1NC=Nc2c1nc[n]2[C@@H]1OCCC1	2	Drug Scaffolds	0.53333	0.80188	3	0.42972
O=C1C=C2C=C[C@@H]([C@H](CCC3)C3CC3)[C@@H]3C2CC1	1	Drug Scaffolds	0.55556	0.71389	4	0.42939
C(C1NCCCC1)c1ccccc1	2	Drug Scaffolds	0.69231	0.51193	2	0.42935
C(C1=NCCN1)N(Cc1ccccc1)c1ccccc1	1	Drug Scaffolds	0.5	0.64123	3	0.42915
C(C1)CNCCC1c1ccccc1	1	Drug Scaffolds	0.61538	0.52698	2	0.42897
O=C([C@H](Cc1c[s]cn1)NC([C@H](CO1)NC1=O)=O)N1CCCC1	1	Drug Scaffolds	0.47826	0.74421	3	0.42891
O=C(Cc1cc2ccccc2cc1)Oc1ccccc1	1	Drug Scaffolds	0.65	0.58959	3	0.42886
O=C([C@H](CC1CCCC1)[n]1cncc1)Nc1ncccc1	1	Drug Scaffolds	0.52381	0.72768	3	0.42886
O=C(c1ccccc1)N[C@@H]([C@H]1SCCN11)C1=O	1	Drug Scaffolds	0.58824	0.73783	4	0.42879
C(C[C@@H]1c2ccccc2)Cc2c1cccc2	1	Drug Scaffolds	0.5625	0.64283	3	0.42878
C([C@H](c1ccccc1)c1cc2ccccc2nc1)c1cccc2ccccc12	1	Drug Scaffolds	0.46429	0.73536	5	0.42877
C(C1CC1)c1ccccc1	1	Drug Scaffolds	0.7	0.47958	2	0.42859
O=C1C(c2ccccc2)=C(c2ccccc2)OC1	1	Drug Scaffolds	0.55556	0.72768	3	0.42854
O=C1c2c(ccc(N3)c4)c4ccc2OC1O/C=C/CCCCCCCC/C=C/C=C\C3=O	1	Drug Scaffolds	0.4375	0.79438	3	0.42843
C(c1nc(cccc2)c2[n]1Cc1ccccc1)N1CCCC1	1	Drug Scaffolds	0.5	0.76251	4	0.42834
C1Oc(cc2C(c3ccccc3)=NNCCc2c2)c2O1	1	Drug Scaffolds	0.5	0.77245	4	0.42789
O=C1N=CC=CN1[C@H]1OCC=C1	1	Drug Scaffolds	0.58333	0.71278	2	0.42771
O=C1NCC(c2ccccc2)=C1c1ccccc1	1	Drug Scaffolds	0.55556	0.67407	3	0.42767
C(c1ccc[s]1)c1ccccc1	1	Drug Scaffolds	0.66667	0.54931	2	0.42764
C=C(CCCC1)/C\1=C\C=C1\C(CCC2)C2CCC\1	5	Drug Scaffolds	0.55556	0.63799	3	0.42758
C(c1ccccc1)[n]1c(N2CCNCC2)nc2c1cccc2	1	Drug Scaffolds	0.5	0.77872	4	0.42755
O=S(c1ccccc1)(NCC1OCCC1)=O	1	Drug Scaffolds	0.625	0.58006	2	0.42744
O=C(c1c[s]cc11)N(Cc2ccccc2)C1=O	1	Drug Scaffolds	0.58824	0.70075	3	0.42739
O=C(CC1)O[C@@]1([C@@H]1[C@H]2C1)C(CC1)[C@@H]2[C@H]([C@@H]2[C@H]3C2)[C@H]1C(CC1)C3=CC1=O	1	Drug Scaffolds	0.52	0.80548	9	0.42739
C1C(c2cc(-c3cncnc3)ccc2)N=CSC1	1	Drug Scaffolds	0.61111	0.66621	3	0.4273
O=C1NC(C2CCCCC2)=CC=C1	2	Drug Scaffolds	0.61538	0.58006	2	0.42726
O=C(c1cccc2ccccc12)N[C@@H]([C@H]1SCCN11)C1=O	1	Drug Scaffolds	0.52381	0.77245	5	0.42709
C(Cc1ccccc1)C1NCCc2c1cccc2	1	Drug Scaffolds	0.61111	0.66888	3	0.42707
C(C1)NCCN1c1ccccc1	3	Drug Scaffolds	0.66667	0.51517	2	0.42699
O=S1(NCNc2c1cccc2)=O	6	Drug Scaffolds	0.5	0.71045	2	0.42696
O=C(C(c1ccccc1)c1ccccc1)OC1C(CC2)CC[NH+]2C1	1	Drug Scaffolds	0.45833	0.68629	5	0.42651
O=C1C=C2C=C[C@@H]([C@H](CCC3)C3CC3)[C@H]3C2CC1	3	Drug Scaffolds	0.55556	0.69203	4	0.42638
O=C([C@@H](C12)C=CC[C@H]1OC/C\2=C/C=C/C1)O[C@@H](C2)C[C@@]3(OCCCC3)O[C@@H]2C/C=C/[C@H]1O[C@@H](CC1)OC[C@@H]1O[C@@H]1OCCCC1	1	Drug Scaffolds	0.44444	0.88107	6	0.42635
O=C([C@H](CC1)O[C@H]1[n]1c2nc(C#CCC3CCNCC3)ncc2nc1)NC1CC1	1	Drug Scaffolds	0.62069	0.84323	5	0.42634
O=S(c1ncccc1)(Nc1nc(-c2ccncc2)ncc1Oc1ccccc1)=O	1	Drug Scaffolds	0.44828	0.7971	4	0.42632
C1NCC(c2ccccc2)OC1	2	Drug Scaffolds	0.66667	0.59725	2	0.42622
O=S(c1ccccc1)(/N=C/N(C[C@@H]1c2ccccc2)N=C1c1ccccc1)=O	1	Drug Scaffolds	0.5	0.77117	4	0.4259
O=C(CCCNC([C@H]([C@H](c1cnc[nH]1)O[C@@H]1OCCC[C@@H]1O[C@H]1OCCCC1)NC(c1ncncc1)=O)=O)NCC(NCCc1nc(-c2ncc[s]2)c[s]1)=O	1	Drug Scaffolds	0.50909	0.90974	6	0.42587
C(C(c1ccccc1)OCc(cc1)ccc1Sc1ccccc1)[n]1cncc1	1	Drug Scaffolds	0.57143	0.6593	4	0.42587
O=C1Nc(cccc2)c2C(c2ccccc2)=NC1	22	Drug Scaffolds	0.5	0.73701	3	0.4258
O=S(c(cc1)ccc1Oc1ccncc1)(N1CCSCC1)=O	1	Drug Scaffolds	0.63636	0.64283	3	0.42578
C(C1)CC1N(C1CCC1)[C@H](C1)COc2c1cccc2	1	Drug Scaffolds	0.52632	0.69203	4	0.4257
O=C(C=CO1)NS1(=O)=O	1	Drug Scaffolds	0.55556	0.72259	1	0.42568
C([C@@H](C1CCOCC1)[C@H]1OCCNC1)c1ccccc1	1	Drug Scaffolds	0.5	0.66755	3	0.42562
O=S(c1ccccc1)(Nc1ccn[s]1)=O	1	Drug Scaffolds	0.6	0.60067	2	0.42551
O=C(C=C1)C=C(Cc2ccccc2)C1=O	1	Drug Scaffolds	0.6	0.61868	2	0.42524
O=C(c1c([C@H](CCC2)C3)c2ccc1)N3[C@H]1C(CC2)CCN2C1	1	Drug Scaffolds	0.45455	0.83766	6	0.42519
O=C(CC1)C(CC2)[C@@H]1[C@H](CC1)[C@H]2c2c1cccc2	2	Drug Scaffolds	0.55556	0.68511	4	0.42514
C(CC1CC2)C[C@H]1[C@H]1[C@H]2C(CCCC2)[C@@H]2CC1	5	Drug Scaffolds	0.52941	0.42063	4	0.42473
C(CN1CCNCC1)CN1c(cccc2)c2C=Cc2c1cccc2	1	Drug Scaffolds	0.5	0.69426	4	0.42467
c([nH]nc1)c1-c1n[n]2c(Sc3cc4cccnc4cc3)nnc2cc1	1	Drug Scaffolds	0.56	0.83685	5	0.42464
O=C(CC1CCCCC1)N[C@H]1Cc(cccc2)c2OB1	1	Drug Scaffolds	0.65	0.69862	3	0.42429
O=S(CCc(cc1)cc2c1[nH]cc2C[C@@H]1NCCC1)(c1ccccc1)=O	1	Drug Scaffolds	0.57692	0.78115	4	0.42422
c1nc(cccc2)c2[n]1-c1nc(Nc2ccccc2)ccn1	1	Drug Scaffolds	0.59091	0.73783	4	0.42416
O=C1N=CC=CN1[C@H]1OCOC1	1	Drug Scaffolds	0.58333	0.71278	2	0.42408
O=C(CN1N=C(c2ccccc2)c(cccc2)c2C1=O)Nc(cc1)cc2c1nc[o]2	1	Drug Scaffolds	0.5	0.85485	5	0.42403
O=C1OC(COC(CC(C[C@H](CCCC(C2)=O)O[C@@H]3OCCCC3)=O)=O)[C@@H]2N1CCCC[n]1nnc(-c2ccccc2)c1	1	Drug Scaffolds	0.55814	0.84245	4	0.42398
O=C(c1cc(C[n](cc2)c3c2cccc3)ccc1)N1CCCCC1	1	Drug Scaffolds	0.58333	0.72942	4	0.42389
O=S(C1CC1)(Nc(cccc1)c1Nc1ccccc1)=O	1	Drug Scaffolds	0.55	0.65055	3	0.42389
O=C(c1c(-c2ccncc2)nccc1)N1CCC(Cc2ccccc2)CC1	1	Drug Scaffolds	0.59259	0.75973	4	0.42379
O=C(c1c[nH]cn1)N(C[C@H]1[C@H]2[C@@H]1CNC2)Cc1ccccc1	1	Drug Scaffolds	0.5	0.70285	5	0.4237
O=S(c1ccccc1)(N(CCC1)CCN1S(c1ccccc1)(=O)=O)=O	1	Drug Scaffolds	0.56	0.64904	3	0.42348
C(c1ccccc1)[n]1ncc2c1cccc2	4	Drug Scaffolds	0.625	0.67908	3	0.42331
C(CN(C1)CC2)[C@]1(C1)[C@H]2Oc2c1nccc2	1	Drug Scaffolds	0.5	0.8227	5	0.42322
O=C(CC[C@@H]1COCc2ccc[s]2)N1c1ccccc1	1	Drug Scaffolds	0.6	0.6909	3	0.42314
O=C1Nc(cccc2)c2C(C2=CCCCC2)=NC1	1	Drug Scaffolds	0.5	0.79048	3	0.42312
O=C1NC(c2cccc(S(NCCC3NCCC3)(=O)=O)c2)=Nc2c1[nH]nc2	1	Drug Scaffolds	0.55556	0.82315	4	0.42309
O=S(c1ccccc1)(Nc1nc(-c2ncccn2)ncc1Oc1ccccc1)=O	1	Drug Scaffolds	0.44828	0.7659	4	0.42295
C(C1)CC1c1ccccc1	1	Drug Scaffolds	0.7	0.51299	2	0.42281
C(CC1)CCN1c1c(cccn2)c2ccc1	1	Drug Scaffolds	0.5625	0.68393	3	0.42275
C1C[C@@H](O[C@@H]2COCCC2)OCC1	1	Drug Scaffolds	0.69231	0.55597	2	0.42271
O=C(c(cccc1)c1N=C1CNc2ncnc3c2nc[nH]3)N1c1ccccc1	1	Drug Scaffolds	0.42857	0.85664	5	0.4227
C(C(C1)Nc2ccccc2)N1C(c1ccccc1)c1ccccc1	1	Drug Scaffolds	0.54167	0.62421	4	0.4227
O=C1ON=C(c(cccc2)c2-c2ccc(C[n]3c(cccc4)c4nc3)cc2)N1	1	Drug Scaffolds	0.57143	0.79656	5	0.42269
O=C(c1ccccc1)N1CCOCC1	1	Drug Scaffolds	0.64286	0.53395	2	0.42265
O=C(c1c2cccc1)N(C(CCC(N1)=O)C1=O)C2=O	2	Drug Scaffolds	0.52632	0.76251	3	0.42265
O=C1N2C=C(CSc3nnn[nH]3)CS[C@@H]2C1	1	Drug Scaffolds	0.625	0.70997	3	0.42254
N=C(CC1)C[C@@H]2[C@@H]1[C@H](CCC1)C1CC2	1	Drug Scaffolds	0.57143	0.52698	3	0.42253
c(cc1)ccc1N(c1ccccc1)c1ncccn1	2	Drug Scaffolds	0.47368	0.56446	3	0.42252
O=P(OC[C@H](CC1)O[C@H]1[n]1c2ncncc2nc1)Oc1cccc2ccccc12	1	Drug Scaffolds	0.58621	0.82538	5	0.42249
O=C(N1C(CC2)CCN2CC1)Oc1ccccc1	1	Drug Scaffolds	0.55556	0.65205	4	0.42208
O=C(C1=C([C@H]2OCCC2)S[C@@H](C2)N1C2=O)OCC(O1)=COC1=O	1	Drug Scaffolds	0.52174	0.88694	5	0.42205
C(C1)NCCN1C(c1c(C2)cccc1)=Nc1c2cccc1	1	Drug Scaffolds	0.47619	0.78648	4	0.42192
C(C1)[C@@H](C2)CN(CC3)[C@@H]1[C@@H]2c1c3c(cccc2)c2[nH]1	1	Drug Scaffolds	0.47368	0.86015	6	0.42187
C(CN[C@H]1Cc(cc2)ccc2Oc2c([C@@H](C3)[NH2+]CC4)c4ccc2)c(cc2)c1cc2Oc1cccc3c1	1	Drug Scaffolds	0.38889	0.83807	6	0.4218
O=C(C[C@H]1O[C@H](c2ccccc2)c(cccc2)c2NC1=O)N1CCCCC1	1	Drug Scaffolds	0.48148	0.79977	4	0.42172
N=C(CCO1)C[C@]1(C[C@@H](C1)O2)O[C@H]1C/C=C/CC/C=C/C=C(\CO[C@H]1CC=C3)/C1[C@H]3C2=O	1	Drug Scaffolds	0.40625	0.8534	4	0.42169
C(C1)CO[C@H]1[n]1c(N=CNCC2)c2nc1	2	Drug Scaffolds	0.53333	0.77625	3	0.42152
C(c1ccccc1)c1cccc([C@]2(OC3)OC3CCC2)c1	1	Drug Scaffolds	0.57143	0.74654	5	0.4215
O=C(c1ccccc1)OC[C@@]1(CCC2)C(CC3C4C(C5)C6C[C@@H]5CC4)[C@@]26C3NC1	1	Drug Scaffolds	0.48276	0.77436	10	0.42147
O=C(c1nccnc1)Nc1cccc([C@@]23N=CSC[C@@H]2COC3)c1	1	Drug Scaffolds	0.54167	0.82538	4	0.42144
O=C(c1ccccc1)N(c1ccccc1)c1ccccc1	1	Drug Scaffolds	0.47619	0.61678	3	0.42137
C([n+]1ccccc1)[n+]1ccccc1	1	Drug Scaffolds	0.69231	0.34256	2	0.42127
C(C1)NCCN1C1=Nc(cccc2)c2Nc2c1cccc2	1	Drug Scaffolds	0.47619	0.78648	4	0.42127
C=C1[C@@H](C/C=C(\CCO2)/C2=O)C(CCCC2)[C@@H]2CC1	1	Drug Scaffolds	0.52632	0.64904	3	0.42125
O=C(c1ccccc1)N[C@H]1c(cccc2)c2OCC1	1	Drug Scaffolds	0.57895	0.71389	3	0.42105
C(c1ccccc1)[n]1nc(cccc2)c2c1-c1ccccc1	1	Drug Scaffolds	0.5	0.81291	4	0.42101
O=C(c(ccc(N1CCNCC1)c1)c1NC1CCOCC1)Nc1n[nH]c2c1cc(Cc1ccccc1)cc2	1	Drug Scaffolds	0.5	0.8267	6	0.42099
O=C(Cc1ccccc1)Nc1ccccc1	2	Drug Scaffolds	0.6875	0.51585	2	0.42097
O=C(C(CC1[C@]23CCN(CC4CC4)[C@@H]1C1)=C[C@@H]2Oc2c3c1ccc2)NCc1nc(-c2ccccc2)n[o]1	1	Drug Scaffolds	0.48649	0.95405	8	0.4208
O=C(NN1CCCCCC1)NS(c1ccccc1)(=O)=O	2	Drug Scaffolds	0.6	0.61095	2	0.42078
C([C@@H]1NCCCC1)c1ccccc1	1	Drug Scaffolds	0.69231	0.51193	2	0.42073
C(c1c[nH]nc1)c1c(CCC2)c2ccc1	1	Drug Scaffolds	0.53333	0.65645	3	0.42073
C(CC1)CCC1Nc1ncncc1	1	Drug Scaffolds	0.69231	0.51193	2	0.42071
O=C(C12CCN(CCCC(c3ccccc3)c3ccccc3)CC1)NCN2c1ccccc1	1	Drug Scaffolds	0.51515	0.76856	5	0.42068
O=C1C(c2ccccc2)=C(C[n](c2ncncc22)nc2-c2ccccc2)Oc2c1cccc2	2	Drug Scaffolds	0.42424	0.92351	6	0.42056
C(CNC1)c2c1[o]nc2	1	Drug Scaffolds	0.55556	0.73778	2	0.42027
C=C(CCC1)c2c1cccc2	1	Drug Scaffolds	0.54545	0.61893	2	0.42022
O=S(c1ccccc1)(Nc1c(Nc2ccccc2)nccc1)=O	1	Drug Scaffolds	0.56522	0.72232	3	0.42011
O=C1NC=Nc2c1cc([C@H](CC1)Nc3ccccc3)c1c2	1	Drug Scaffolds	0.57143	0.81291	4	0.42003
C1NC(C(CCC2)c3c2cccc3)=NC1	1	Drug Scaffolds	0.53333	0.72323	3	0.41969
O=C(CC1)O[C@@]1(CC1)C(CC2)[C@@H]1[C@H](CC1)[C@H]2C(CC2)C1=CC2=O	1	Drug Scaffolds	0.56522	0.76455	5	0.41942
C(Cc1n[nH]nn1)[C@@H](CC1)C[C@H]2[C@@H]1CNCC2	1	Drug Scaffolds	0.64706	0.58959	3	0.41941
O=C(Cc1ccccc1)N1N=CC[C@H]1C(NCc(cccc1)c1-[n]1nnnc1)=O	1	Drug Scaffolds	0.55172	0.807	4	0.41924
C(C1CCCC1)c1ccccc1	1	Drug Scaffolds	0.66667	0.49074	2	0.41904
C(c1cc2ncn[n]2cn1)[n]1c(-c2ncccc2)ncc1	1	Drug Scaffolds	0.57143	0.80649	4	0.41887
C(CN[C@@H]1c2ccccc2)c2c1[nH]c1c2cccc1	1	Drug Scaffolds	0.52632	0.82973	4	0.41872
C(CCC1)CCc2c1[nH]c1c2cccc1	1	Drug Scaffolds	0.53333	0.75761	2	0.41861
O=C(C(c(cccc1)c1N1Cc2ccccc2)(C1=O)N1)NC1=O	1	Drug Scaffolds	0.47826	0.89586	4	0.41854
O=C(C1)N(CC2C[n]3nncc3)[C@@H]1S2(=O)=O	1	Drug Scaffolds	0.5625	0.78821	4	0.41853
O=C1NC(c2cccc(S(N3CCNCC3)(=O)=O)c2)=NC2C=CNC12	1	Drug Scaffolds	0.52	0.8218	4	0.41847
O=C(CCCC1)[C@H]1c1ccccc1	1	Drug Scaffolds	0.61538	0.56985	2	0.41841
C(CC1)CCC1c1cccc2ccccc12	1	Drug Scaffolds	0.5625	0.59634	3	0.41831
O=C(c1cc(Oc2ncccc2)ccc1)N1CCCC1	1	Drug Scaffolds	0.6	0.67534	3	0.41829
O=C(C1CCCCC1)N(C1CCCCC1)c1c[s]cc1	1	Drug Scaffolds	0.5	0.70075	3	0.41819
C([C@@H]([C@H]1O[C@@H]2CC1)[C@@H]2c1ncc[o]1)c1ccccc1	1	Drug Scaffolds	0.52632	0.80649	5	0.41816
O=C(CN1)N(CCC2)C2C1=O	1	Drug Scaffolds	0.54545	0.67959	2	0.41809
C1NC[C@@H]([C@H](c2ccccc2)Oc2ccccc2)OC1	1	Drug Scaffolds	0.5	0.69754	3	0.41805
O=C(C(c1ccccc1)c1ccccc1)OCC1[NH2+]CCC1	1	Drug Scaffolds	0.5	0.62054	3	0.4179
C1NC(Nc2cccc3n[s]nc23)=NC1	1	Drug Scaffolds	0.53333	0.73199	3	0.41773
C(c1ccccc1)c1cccc(Cc2ccccc2)c1	1	Drug Scaffolds	0.65	0.45401	3	0.41772
C1NCC(C(c2ccccc2)Oc2ccccc2)OC1	1	Drug Scaffolds	0.5	0.69754	3	0.41765
c1cnc[n]1C(c1ccccc1)c(cc1)cc2c1[nH]cn2	1	Drug Scaffolds	0.47619	0.72855	4	0.41762
O=C(CO1)NC1=O	2	Drug Scaffolds	0.71429	0.76753	1	0.41756
O=C(c1cccc2ccccc12)N[C@H]([C@@H]1SCCN11)C1=O	1	Drug Scaffolds	0.52381	0.76856	5	0.4174
O=C1SCCC1	2	Drug Scaffolds	0.66667	0.59725	1	0.41716
O=S(CCCC1)(N1c1ccccc1)=O	1	Drug Scaffolds	0.57143	0.63126	2	0.41711
O=C1OCC=C1	1	Drug Scaffolds	0.66667	0.59725	1	0.41706
O=C(CC1)C(CC2)[C@@H]1[C@H](CC1)[C@H]2C(CC2)C1=CC2=O	1	Drug Scaffolds	0.57895	0.69203	4	0.41702
O=C([C@@H]1OCCNC1)N(Cc1n[nH]c2c1cccn2)C1CC1	1	Drug Scaffolds	0.54545	0.78354	4	0.41691
O=C(CC[C@@H]1CCCc2ccc[s]2)N1c1ccccc1	1	Drug Scaffolds	0.6	0.68031	3	0.41684
c(cc1)ccc1Oc1cccc2ncccc12	1	Drug Scaffolds	0.58824	0.6593	3	0.41684
C(CN1CCCCC1)CN1c(cccc2)c2Sc2c1cccc2	5	Drug Scaffolds	0.52174	0.69315	4	0.41678
O=C(c(cccc1)c1-[n]1nccn1)N(C1)CC(C2)C1CN2c1ncccn1	1	Drug Scaffolds	0.55556	0.76182	5	0.4167
O=C([C@H](CC1)NCCCc2ccccc2)Nc2c1cccc2	1	Drug Scaffolds	0.63636	0.70181	3	0.41668
C(C1)C1C(C1CC1)NC1=NCCO1	1	Drug Scaffolds	0.53846	0.52698	3	0.41657
C(c1ccccc1)Nc1c([C@H](CC2)Cc3c2cccc3)cccc1	1	Drug Scaffolds	0.58333	0.71675	4	0.41656
O=C(NCc1ccccc1)N(Cc1ccccc1)C1CCNCC1	1	Drug Scaffolds	0.54167	0.63126	3	0.41646
O=C(c1c([C@@H](CCC2)C3)c2ccc1)N3[C@@H]1C(CC2)CCN2C1	1	Drug Scaffolds	0.45455	0.83766	6	0.41645
C(C1NCCCC1)c1ccnc2ccccc12	1	Drug Scaffolds	0.58824	0.69536	3	0.41643
C1[C@@H](c2nc(cc(cc3)-c4c(CCc5cc(-c(cc6)cc7c6[nH]c([C@H](C6)N[C@@H]8[C@H]6CCCC8)n7)c(CC6)cc5)ccc6c4)c3[nH]2)N[C@@H]2[C@H]1CCCC2	1	Drug Scaffolds	0.51923	0.85805	10	0.41634
O=C1Oc(cc(cc2)N(C=CC(N3[C@H](CC4)c5c4cccc5)=O)C3=O)c2N1	1	Drug Scaffolds	0.51852	0.86592	5	0.41629
S=C1NC=Nc2c1nc[n]2[C@@H]1OCCC1	1	Drug Scaffolds	0.53333	0.80188	3	0.41627
C(C1)C(C2)CN(CC3)[C@@H]1C2c1c3c(cccc2)c2[nH]1	1	Drug Scaffolds	0.47368	0.85267	6	0.41626
C(c(cc1)ccc1-c(cccc1)c1-c1nnn[nH]1)[n]1c(cccc2)c2nc1	1	Drug Scaffolds	0.55556	0.78706	5	0.41617
C(C1(c2ccccc2)OCCO1)[n]1ncnc1	1	Drug Scaffolds	0.52941	0.68861	3	0.41614
O=C(c(nc(C1(C2)C(C3)CC2CC3C1)[nH]1)c1N1)NC1=O	1	Drug Scaffolds	0.5	0.82315	8	0.41604
O=C(N(Cc1ccccc1)c1ccccc1)O[C@@H]1C(CC2)CCN2C1	1	Drug Scaffolds	0.48	0.72591	5	0.41596
O=C(C(N(CC1)CCN1C(c1ccccc1)=O)=O)c1c[nH]c2c1ccnc2-[n]1ncnc1	2	Drug Scaffolds	0.5625	0.88374	5	0.41576
O=C(C(N=C(N1)N(CCCC2)S2(=O)=O)=CC1=O)NCc1ccccc1	1	Drug Scaffolds	0.56	0.81625	3	0.41571
C(c1ncccc1)[n]1nc2c3c1ncnc3SCC=C2	1	Drug Scaffolds	0.55	0.87401	4	0.41563
O=C([C@H]1/N=C/N2CCCCCC2)N2[C@@H]1SCC2	2	Drug Scaffolds	0.58824	0.70997	4	0.41547
O=C1c2c(cc(C=NN(CC3)CCN3C3CCCC3)c(N3)c4)c4ccc2OC1O/C=C\CCCCCCCC/C=C\C=C/C3=O	1	Drug Scaffolds	0.48889	0.85304	5	0.41526
O=C(c1c(Cc2c[nH]nc2)[s]c(NC(N2)=O)c1C2=O)N1OCCC1	1	Drug Scaffolds	0.41667	0.92195	4	0.41522
O=C1C=C(CC[C@@H]2C3CCC4[C@H]2CCC4)C3C=C1	6	Drug Scaffolds	0.55556	0.66348	4	0.41519
C(CN1CCCCC1)C(C(C1)C2C=CC1C2)c1ccccc1	1	Drug Scaffolds	0.5	0.67534	5	0.41518
O=C1N(Cc(cc2)ccc2-c(cccc2)c2S(Nc2n[o]cc2)(=O)=O)C=NC11CCCC1	1	Drug Scaffolds	0.53125	0.82225	5	0.415
O=C(N[C@H](CCNS(c1ccccc1)(=O)=O)Cc1ccccc1)O[C@@H]1[C@H](CCO2)[C@H]2OC1	1	Drug Scaffolds	0.5	0.7659	4	0.41478
O=C(NCc(cccc1)c1Oc(cc1)cc2c1[nH]nc2)Nc1ccn[n]1-c1ccccc1	1	Drug Scaffolds	0.5625	0.79328	5	0.4147
C(CN1CCCC1)C(C1CCCCC1)c1ccccc1	1	Drug Scaffolds	0.5	0.60279	3	0.41469
O=C1C=C(CC[C@@H]2C3CCC4[C@H]2CCC4)C3C=C1	20	Drug Scaffolds	0.55556	0.6715	4	0.41457
O=C(C(c1ccc[s]1)c1ccc[s]1)O[C@@H](C1)C[C@@H]2[NH2+][C@H]1[C@H]1O[C@@H]21	1	Drug Scaffolds	0.47826	0.81047	7	0.41438
O=C(c(cccc1)c1N(C(CC1)=O)C1=O)OC[C@@]1(CCC2)[C@@H](C[C@@]34OCO[C@]33[C@@H](C5)[C@H]6C[C@@H]5CC3)[C@@]26C4NC1	1	Drug Scaffolds	0.38462	0.92217	12	0.41421
C(C1OCCC1)Oc1ccccc1	1	Drug Scaffolds	0.69231	0.47083	2	0.41418
C(c1ccccc1)c1cccc(C2(OC3)OC3CCC2)c1	1	Drug Scaffolds	0.57143	0.73536	5	0.4139
O=C1N(Cc2cnc[nH]2)CCN[C@H]1Cc1ccccc1	1	Drug Scaffolds	0.6	0.6909	3	0.41381
C(CN1CCOCC1)C(c1ccccc1)c1ccccc1	1	Drug Scaffolds	0.52381	0.55002	3	0.41379
N=C(c1c(CC2)cccc1)c1c2cccc1	1	Drug Scaffolds	0.5	0.64123	3	0.41373
O=C(c1cccc(CC(c2c3cccc2)=NNC3=O)c1)N1CCCCC1	1	Drug Scaffolds	0.53846	0.78648	4	0.41365
O=C(c1cccc(CN(c(cccc2)c2C(N2)=O)C2=O)c1)N(CC1)CCN1c1ncccn1	1	Drug Scaffolds	0.54545	0.81145	5	0.41361
O=C(CC1)Nc2c1cccc2	1	Drug Scaffolds	0.63636	0.66483	2	0.4136
O=C1Nc(cccc2)c2C(c2ncccc2)=NC1	1	Drug Scaffolds	0.5	0.78821	3	0.41358
O=C(CC1(CCC2)N2CCC1)Nc1ccccc1	1	Drug Scaffolds	0.55556	0.65055	3	0.41351
O=C(C(c1ccccc1)c1ccccc1)OC1C[NH2+]CCC1	1	Drug Scaffolds	0.5	0.63466	3	0.41351
O=C([C@H](CCC1)N1S(c1ccccc1)(=O)=O)Nc1ccccc1	1	Drug Scaffolds	0.56522	0.75255	3	0.41349
O=C(c1ncccc1)Nc1cccc([C@@]23N=CSC[C@@H]2COC3)c1	1	Drug Scaffolds	0.54167	0.82538	4	0.41342
C1Oc(cccc2)c2OC1	1	Drug Scaffolds	0.6	0.55452	2	0.4134
O=C(CSC1CCCCC1)O[C@H](CCCC[C@@]1(CC2)CCC3)C3[C@@H]1C2=O	1	Drug Scaffolds	0.5	0.73536	3	0.41322
O=C(NC[C@@H]1c2ccccc2)N1c(cc1)cc2c1[nH]cn2	1	Drug Scaffolds	0.52381	0.77933	4	0.41309
O=C(c1c[nH]c2c1cccc2)O[C@@H]1C[C@H](CC2)N[C@H]2C1	1	Drug Scaffolds	0.55	0.78235	5	0.41304
C1NCc2nc(-c3ccccc3)c(Nc3ccccc3)[n]2C1	1	Drug Scaffolds	0.5	0.80497	4	0.41299
C(CC1)Cc2c1cccc2	2	Drug Scaffolds	0.6	0.55452	2	0.41292
C=C(C(N[C@@H]([C@H]1SCC=CN11)C1=O)=O)c1c[s]cn1	1	Drug Scaffolds	0.57895	0.79048	3	0.41281
c(cc1)cc2c1Oc(cccc1)c1C=C2	1	Drug Scaffolds	0.53333	0.60067	3	0.41276
C(c(cc1)cc2c1nc[n]2-c1cc(OCc2ccccc2)c[s]1)N1CCNCC1	1	Drug Scaffolds	0.62069	0.8153	5	0.41271
O=C(c1cccc(CC(C(N2)=O)OC2=O)c1)NCc1ccccc1	1	Drug Scaffolds	0.625	0.69315	3	0.41269
O=C(CNC([C@H]1Cc2c3[nH]c4c2cccc4)=O)N1[C@@H]3c(cc1)cc2c1OCO2	1	Drug Scaffolds	0.39286	0.94029	6	0.41267
C(c1ccccc1)[n]1cccc1	1	Drug Scaffolds	0.66667	0.49074	2	0.41266
C(CC1CC2)C[C@@H]1[C@@H](CC1)[C@@H]2C2[C@]11O[C@H]1C=CC2	1	Drug Scaffolds	0.5	0.71485	6	0.41264
O=C(c1ccccc1)NC1C(CCC2)CN2CC1	1	Drug Scaffolds	0.61111	0.65055	3	0.41254
O=S(CCN[C@@H]1c2ccccc2)(c2c1cccc2)=O	1	Drug Scaffolds	0.47368	0.76455	3	0.41247
O=C(CCc1ccccc1)N[C@@H](Cc1ccccc1)c1c[s]c(-c2ccc[s]2)n1	1	Drug Scaffolds	0.51724	0.78531	4	0.41234
O=C(c1cccc(S(Nc2ccccc2)(=O)=O)c1)N1C[C@@H](CCC2)N2CC1	1	Drug Scaffolds	0.55556	0.75547	4	0.41223
O=C(c1ccccc1)OCC/C(\SS/C(\CCOC(c1ccccc1)=O)=C/NCc1cncnc1)=C\NCc1cncnc1	1	Drug Scaffolds	0.45455	0.61868	4	0.41222
C(C1)NCCN1C1=Nc(cccc2)c2Nc2c1cc[s]2	1	Drug Scaffolds	0.5	0.81905	4	0.41222
C(c1nnc(cc2)[n]1nc2-c1ccncc1)c1cc2cccnc2cc1	1	Drug Scaffolds	0.57692	0.80998	5	0.41208
C(C[NH2+]C1)C1=C(c1ccccc1)c1ccccc1	1	Drug Scaffolds	0.5	0.65788	3	0.41192
O=C(CCC[C@@H](/C=C/C1CCCCC1)OC([C@H](CCCC1)N1C1=O)=O)C/C=C/CCCC[C@H](CCC2)OC2C1=O	2	Drug Scaffolds	0.425	0.80497	3	0.4119
c1c(-c2ccccc2)[n](-c2ccccc2)nc1	1	Drug Scaffolds	0.58824	0.6909	3	0.4119
O=C(Cc1ccccc1)N[C@H]([C@@H]1SCC=CN11)C1=O	5	Drug Scaffolds	0.63158	0.75255	3	0.41183
O=C1N=CC=CN1[C@@H]1OCC=C1	1	Drug Scaffolds	0.58333	0.71278	2	0.41165
O=C1OC(CCc2ccccc2)CC=C1Cc1cccc(NS(c2ncccc2)(=O)=O)c1	2	Drug Scaffolds	0.625	0.77052	4	0.41165
O=C1N(Cc2nc(cccc3)c3[s]2)N=Cc2c[s]cc12	1	Drug Scaffolds	0.55	0.81719	4	0.41165
C(c1ccccc1)[n]1nncc1	1	Drug Scaffolds	0.66667	0.54931	2	0.41162
O=C(c1ccccc1)c(cccc1)c1-[n]1ncnc1	1	Drug Scaffolds	0.52632	0.73284	3	0.41142
O=C([C@H](Cc1ccccc1)C1)NC[C@@H]1c1cc(OC2CCCC2)ccc1	1	Drug Scaffolds	0.57692	0.7268	4	0.41132
O=C([C@@H](C[C@@H]1c2ccccc2)NCc2ccccc2)N1c1ccccc1	1	Drug Scaffolds	0.5	0.78531	4	0.41112
O=C(CC(c1ccccc1)c1ccccc1)N1CCCC1	1	Drug Scaffolds	0.47619	0.58727	3	0.41112
C(c1c[nH]cn1)c1ccccc1	2	Drug Scaffolds	0.66667	0.54931	2	0.41098
C(CC1)CCC1O[C@H](CC1)OC(CC2)C1O[C@@H]2O[C@H]1OCCCC1	1	Drug Scaffolds	0.66667	0.65645	4	0.41095
O=C(Nc1ccccc1)Nc(c1ccccc11)ccc1Oc1nc(Nc2ccccc2)ncc1	1	Drug Scaffolds	0.58824	0.75474	5	0.41082
O=C([C@@](C1)(CN(CC2)S(c3c[nH]nc3)(=O)=O)C2=Cc2c1cn[n]2-c1ccccc1)c1ncccc1	1	Drug Scaffolds	0.42857	0.9666	6	0.41072
O=C(C1(CC1)c(cc1)cc2c1OCO2)Nc1nc(-c2ccccc2)ccc1	1	Drug Scaffolds	0.55556	0.79548	5	0.41066
O=C1N(Cc2ccccc2)C2C(CCC3)[S+]3CC2N1Cc1ccccc1	1	Drug Scaffolds	0.5	0.81951	5	0.41065
O=C(Cc1ccccc1)N(CC1)[C@@H]1C(NCc1ccccc1)=O	1	Drug Scaffolds	0.65217	0.68976	3	0.41065
O=C(c(cc1)c(N2CCCC2)nc1-c1ccccc1)NS(c1ccccc1)(=O)=O	1	Drug Scaffolds	0.51724	0.82225	4	0.4106
C(C(c1ccccc1)SCc1ccccc1)[n]1cncc1	1	Drug Scaffolds	0.52381	0.626	3	0.41057
O=S1(NCN(CN(CC2)CNS2(=O)=O)CC1)=O	1	Drug Scaffolds	0.64706	0.54381	2	0.41052
O=C(c1cc2n[o]nc2cc1)N1CCCCC1	1	Drug Scaffolds	0.58824	0.72591	3	0.41047
C(CN1CCNCC1)CN1c(cccc2)c2Sc2c1cccc2	13	Drug Scaffolds	0.52174	0.69426	4	0.41047
O=C1NC(c2cccc(S(N3CCNCC3)(=O)=O)c2)=N[n]2c1cnc2	1	Drug Scaffolds	0.52	0.8218	4	0.41046
O=C1c(cccc2CNc3ccccc3)c2OC(N2CCOCC2)=C1	1	Drug Scaffolds	0.56	0.80291	4	0.41034
O=C(CCCC1)c2c1nc[n]2Cc(cc1)ccc1-c(cccc1)c1-c1nnn[nH]1	1	Drug Scaffolds	0.51724	0.83438	5	0.41014
O=S(c1cc2ccccc2cc1)(N(CC1)CCN1c1ncccn1)=O	1	Drug Scaffolds	0.6	0.68393	4	0.40967
O=C(CSC1CCCCC1)O[C@@H](CCCC[C@]1(CC2)CCC3)C3[C@H]1C2=O	1	Drug Scaffolds	0.5	0.70898	3	0.4096
C([C@H]1OCC1)[n]1c(cccc2)c2nc1CN(CC1)CCC1c1nc(OCc2ccccc2)ccc1	1	Drug Scaffolds	0.57143	0.83354	6	0.40956
O=C(c1ccccc1)N(CC1)CCN1C(c1cccc(CC(c2c3cccc2)=NNC3=O)c1)=O	1	Drug Scaffolds	0.55882	0.78878	5	0.4095
C(C(C1CCCCC1)c1ccccc1)N1CC[NH2+]CC1	1	Drug Scaffolds	0.5	0.63297	3	0.4093
C(CNC1)[C@H]1c1cnc2[n]1c(cc[nH]1)c1nc2	1	Drug Scaffolds	0.47059	0.85194	4	0.40923
C(Cc1nc(cccc2)c2[nH]1)[C@H](C1)C[C@H]1NC[C@H](CC1)O[C@H]1[n]1c2ncncc2nc1	1	Drug Scaffolds	0.64516	0.84245	6	0.40922
O=S(c1ccccc1)(N(CC1)CC(C2)C1=Cc1c2cn[n]1-c1ccccc1)=O	1	Drug Scaffolds	0.57143	0.87275	5	0.4092
O=C(Cc1ccccc1)N(CCC1)C[C@@]1(CC[N+](CC1)(CC2)CCC12c1ccccc1)c1ccccc1	1	Drug Scaffolds	0.51351	0.74499	7	0.40914
c([nH]nc1)c1-[n]1c(cccc2)c2c(Sc2ccccc2)c1	1	Drug Scaffolds	0.52381	0.81194	4	0.40895
C(Cc1ccccc1)C(c1cc(/C=C/c2nc3ccccc3cc2)ccc1)SCC1CC1	1	Drug Scaffolds	0.5625	0.74025	5	0.40887
O=C(N(Cc1nc(cccc2)c2[nH]1)c1c(C2)cccc1)N2C1CC1	1	Drug Scaffolds	0.45833	0.8293	5	0.40881
C(c1ncncc1)[n](cc1)c2c1nccc2	1	Drug Scaffolds	0.625	0.73199	3	0.40876
O=C(Cc1ccccc1)OC1CCCC1	1	Drug Scaffolds	0.66667	0.50377	2	0.40869
C(C1CCCCC1)Oc1ccccc1	1	Drug Scaffolds	0.71429	0.44158	2	0.40848
O=S(c1ccccc1)(Nc1c2[nH]ccc2ccc1)=O	2	Drug Scaffolds	0.52632	0.73783	3	0.40831
O=C1NCc2cnc[n]2-c2c1cccc2	2	Drug Scaffolds	0.46667	0.77994	3	0.4081
O=S(c1ccccc1)(Nc1ncc[o]1)=O	1	Drug Scaffolds	0.6	0.60067	2	0.40801
C(C1)COC1c1ccc2[n]1ncnc2	1	Drug Scaffolds	0.57143	0.76723	3	0.40792
C=C(CC1)[C@H](CC2)C1C1[C@@H]2C(CCCC2)[C@H]2CC1	1	Drug Scaffolds	0.55556	0.55303	4	0.4078
C1C[C@H](O[C@H]2COCCC2)OCC1	1	Drug Scaffolds	0.69231	0.55597	2	0.40771
O=C(Cc1ccncc1)c1cccc2c1OC(CC1)(CCS1(=O)=O)O2	1	Drug Scaffolds	0.56	0.7971	4	0.4074
O=C(C[C@H]1C2)N1C=C2SC1C[n+]2cnc[n]2C1	1	Drug Scaffolds	0.64706	0.77811	5	0.40735
O=C(C=C1)c(ccc(N2CCC2)c2)c2N1c1ncccc1	1	Drug Scaffolds	0.52381	0.80949	4	0.40722
O=C(CCCC1)C1c1ccccc1	1	Drug Scaffolds	0.61538	0.55303	2	0.4072
O=C([C@@H](c1ccccc1)NC(N(CCN1)C1=O)=O)N[C@@H]([C@H]1SCCN11)C1=O	2	Drug Scaffolds	0.44444	0.81194	5	0.40713
O=C(C1=CNC=CC1c1ccccc1)OC1CN(Cc2ccccc2)CCC1	1	Drug Scaffolds	0.57143	0.75903	4	0.40712
O=C1N(Cc2cnc3[s]cn[n]23)CCC1	1	Drug Scaffolds	0.53333	0.72502	3	0.40706
C1[C@]2(C3)c(cccc4)c4N[C@H]2[C@H]2[NH+](CC4)[C@@H]3[C@H]1[C@H]4C2	1	Drug Scaffolds	0.47368	0.88197	9	0.40705
C(c1c(C2CCNCC2)cccc1)Oc1ccccc1	1	Drug Scaffolds	0.6	0.64441	3	0.40704
C(c(cc1)ccc1-c1ncc[nH]1)[n]1ncc2c1nc(-c1c(C3CC3)ncnc1)nc2	1	Drug Scaffolds	0.53333	0.83766	6	0.40701
O=S(c1ccccc1)(Nc1nccnc1)=O	1	Drug Scaffolds	0.625	0.61292	2	0.40668
C(c1cc([C@@H]2OCCCC2)ccc1)c(cc1)cc2c1OCCO2	1	Drug Scaffolds	0.6087	0.71292	4	0.40664
O=C(C1=CN(c2cc(C#Cc3cnccc3)ccc2)c(nccc2)c2C1=O)NC1CC1	1	Drug Scaffolds	0.51613	0.87866	5	0.40652
O=C(c1ccccc1)N[C@H]1CNCC1	1	Drug Scaffolds	0.64286	0.55002	2	0.40645
O=P(N1CC1)(N1CC1)OCc1cc(Oc2ccccc2)ccc1	1	Drug Scaffolds	0.56522	0.63634	4	0.40638
C=C1CCN(CC(C[n]2ncnc2)c2ccccc2)CC1	1	Drug Scaffolds	0.52381	0.64123	3	0.40637
O=C(c1ccncc1)Nc1nc(cccc2)c2[n]1[C@H]1CNCCCC1	1	Drug Scaffolds	0.48	0.82626	4	0.40627
C([C@H]1OCCCC1)O[C@@H]1OCCCC1	2	Drug Scaffolds	0.71429	0.53731	2	0.40618
O=C(CN1)NC1=O	2	Drug Scaffolds	0.71429	0.64864	1	0.40617
C(CN(CCC1C2)C2Cc2c1cccc2)c1ccccc1	1	Drug Scaffolds	0.61905	0.70697	4	0.40609
C(c1ccccc1)N(CC1)Cc2c1[s]cc2	4	Drug Scaffolds	0.625	0.655	3	0.40598
O=C([C@@](C1)([C@@H]2O[C@H]1[n]1c3c4[n]2c(cccc2)c2c4c(CNC2=O)c2c3c2c1cccc2)O1)NC1=O	1	Drug Scaffolds	0.34286	1.0096	9	0.40574
O=C(N1[C@@H](Cc2ccccc2)CCCC1)OC[n+]1ccccc1	2	Drug Scaffolds	0.6087	0.6766	3	0.4057
C(CN1CC(CNC2)OC2C1)COc1ccccc1	1	Drug Scaffolds	0.68421	0.54695	3	0.40566
C(c1cc2ccccc2nc1-c1cnccc1)Nc1ncnc2cccnc12	1	Drug Scaffolds	0.46429	0.8534	5	0.40563
O=C(C=CN1[C@@H]2O[C@H](COP(OP(OP(OP(OC[C@H](CC3)O[C@H]3N(C=CC=N3)C3=O)=O)=O)=O)=O)CC2)NC1=O	1	Drug Scaffolds	0.65	0.78354	4	0.40555
O=C(CC1)c(cccc2)c2C1=O	1	Drug Scaffolds	0.5	0.6307	2	0.40546
C(COC(c1ccccc1)c1ccccc1)[C@@H]1NCCC1	1	Drug Scaffolds	0.52381	0.56985	3	0.40545
O=C(N[C@@H](C1)OCC[C@@H]1OCc1ccccc1)Nc1cccc([C@@H](CCC2)c(cccc3)c3S2(=O)=O)c1	1	Drug Scaffolds	0.54054	0.82887	5	0.40519
C(CNCC1)C1c1c[nH]c2c1cccc2	1	Drug Scaffolds	0.6	0.69426	3	0.40515
C=C(C(N[C@H]([C@@H]1SCC=CN11)C1=O)=O)c1c[s]cn1	3	Drug Scaffolds	0.57895	0.78648	3	0.4051
C(C1CCCCC1)c1ccccc1	7	Drug Scaffolds	0.69231	0.44158	2	0.405
O=C(C=CN1[C@H]2O[C@@H](CO[P@@H](Oc3ccccc3)=O)CC2)NC1=O	1	Drug Scaffolds	0.66667	0.75903	3	0.40499
O=C(c1ccccc1)NCC(N1Nc2ccccc2)=Nc(cccc2)c2C1=O	1	Drug Scaffolds	0.5	0.81387	4	0.40496
C(Cc1ccc2)Cc1c2Oc1ccccc1	1	Drug Scaffolds	0.5625	0.66621	3	0.40466
O=C(C1=O)C2=C1NCCCN2	1	Drug Scaffolds	0.54545	0.6452	2	0.40453
O=C(CCCCCC/C=C\C[C@@H](/C=C/c1c[s]cn1)O1)CCCC1=O	1	Drug Scaffolds	0.56	0.63297	1	0.40419
O=C(C(Cc1n[n](cccn2)c2n1)=CC1)O[C@@]1(CCc1ccncc1)C1CCCC1	1	Drug Scaffolds	0.53333	0.84284	5	0.40404
O=C(c1cccc(N2)c1OCC2=O)NC1C(CC2)CCN2C1	1	Drug Scaffolds	0.54545	0.80649	5	0.40403
O=C1OCCN1c1n[o]c2cc(N(CCOC3)[C@H]3C(C3)(C(NC(N4)=O)=O)C4=O)c3cc12	1	Drug Scaffolds	0.41935	0.93298	6	0.40397
C(CC1)Cc2c1[s]cn2	2	Drug Scaffolds	0.55556	0.72752	2	0.40388
C(C1)CO[C@H]1[n]1c2ncnc(NN=C3)c2c3c1	1	Drug Scaffolds	0.47059	0.87115	4	0.40383
C(C1)CNC1c1cccnc1	1	Drug Scaffolds	0.63636	0.64169	2	0.40375
O=C1N=CC=CN1[C@@H]1SCCC1	2	Drug Scaffolds	0.58333	0.71278	2	0.40364
O=C1OC(COC(CC(C[C@H](C(CCC(C2)=O)OCC=Cc3cc4ccccc4nc3)O[C@@H]3OCCCC3)=O)=O)[C@@H]2N1	1	Drug Scaffolds	0.45238	0.83144	4	0.40363
O=C(C=CN1[C@@H]2O[C@H](COP(Oc3ccccc3)=S)CC2)NC1=O	1	Drug Scaffolds	0.66667	0.75903	3	0.40359
O=C(COc1cc([C@@H](CCc2ccccc2)OC([C@H](CCCC2)N2C(Cc2ccccc2)=O)=O)ccc1)NCCNC(COc1cccc([C@@H](CCc2ccccc2)OC([C@H](CCCC2)N2C(Cc2ccccc2)=O)=O)c1)=O	1	Drug Scaffolds	0.48718	0.79764	8	0.40358
O=C(Cc1ccc[s]1)N[C@@H]([C@H]1SCC=CN11)C1=O	1	Drug Scaffolds	0.61111	0.76455	3	0.40356
C1C[C@H](O[C@@H]2COCCC2)OCC1	3	Drug Scaffolds	0.69231	0.55597	2	0.40336
O=C(CCC1)c2c1cccc2	1	Drug Scaffolds	0.54545	0.61893	2	0.40326
O=C(Nc1ccccc1)NS(c(cc1)cc2c1OCC2)(=O)=O	1	Drug Scaffolds	0.59091	0.72942	3	0.40322
O=C(c1ccccc1)N[C@H](CC1)CC[C@H]1NC(c(cccn1)c1Oc1ccccc1)=O	1	Drug Scaffolds	0.6129	0.74106	4	0.40317
O=C(Cc1ccc(C(c2ccccc2)=O)[nH]1)NCC(Oc1ccccc1)=O	1	Drug Scaffolds	0.66667	0.7177	3	0.40301
O=C(c1ccccc1)O[C@@H]([C@H](C1[C@@H](CC2)OC1)C2C(CC(C1)=CC[C@@H]2O3)=O)[C@@]12OC3=O	1	Drug Scaffolds	0.35484	0.90727	5	0.40296
O=C1Oc(cccc2)c2C2=C1CCCCC2	1	Drug Scaffolds	0.5	0.80135	3	0.4028
C1[C@H](O[C@H](CCCC2)[C@@H]2O[C@H]2OCCCC2)OC[C@H]1O[C@H]1OCCCC1	1	Drug Scaffolds	0.61538	0.68511	4	0.40275
C(c1ccccc1)c1cncnc1	2	Drug Scaffolds	0.69231	0.44158	2	0.40273
C(c1nnc(cc2)[n]1nc2-c1ccccc1)Oc1ccnc2ccccc12	1	Drug Scaffolds	0.55556	0.81812	5	0.40267
O=C1NC(c2cccc(S(N3CCNCC3)(=O)=O)c2)=Nc2c1[nH]nc2	1	Drug Scaffolds	0.52	0.82494	4	0.4026
C1CC2c(cccc3)c3NC2CC1	1	Drug Scaffolds	0.53846	0.70389	3	0.40238
O=C(C1)NC[C@H]1c1cc(C[n]2ncc3cncnc23)ccc1	1	Drug Scaffolds	0.59091	0.77436	4	0.40224
O=C(C(c1ccccc1)c1ccccc1)OC1CNCCC1	1	Drug Scaffolds	0.5	0.63466	3	0.40217
O=C(c1c2nccc[n]2nc1)NCC(N1c2ccccc2)=Cc2cccc(C#Cc3c[nH]nc3)c2C1=O	1	Drug Scaffolds	0.48649	0.91408	6	0.402
O=C(Cc1ccccc1)N[C@H]([C@@H]1SCCN11)C1=O	5	Drug Scaffolds	0.61111	0.72855	4	0.4019
C(C1OCCNC1)Oc1ccccc1	1	Drug Scaffolds	0.71429	0.4995	2	0.40178
C(CN1CCCC1)c1ccccc1.C(c1ccccc1)c1ccccc1	1	Drug Scaffolds	0.69231	0.42063	2	0.40167
C(c1ccccc1)c1cc(-c2ccccc2)ncc1	1	Drug Scaffolds	0.63158	0.63962	3	0.40166
O=C1Nc(cccc2)c2N=C1Cc1ccccc1	1	Drug Scaffolds	0.61111	0.72232	3	0.40154
O=C1N(CCCCCN2CCCCC2)c(ncnc2)c2N1	1	Drug Scaffolds	0.66667	0.73783	3	0.4015
O=C1N(C2CCNCCC2)N=C(Cc2ccccc2)c2c1cccc2	1	Drug Scaffolds	0.48	0.82844	4	0.40124
C([C@H]1NCCC1)c1c(-c2c(C[C@H]3NCCC3)c(cccc3)c3[nH]2)[nH]c2c1cccc2	1	Drug Scaffolds	0.4	0.83887	6	0.40119
C(COC(c1ccccc1)c1ccccc1)C1NCCC1	1	Drug Scaffolds	0.52381	0.56985	3	0.40108
C([C@H]1CC2)[C@@H]1[C@@H]2Sc1nnc[nH]1	1	Drug Scaffolds	0.58333	0.59413	4	0.40098
O=C(Cc1ccccc1)OCc1ncccc1	1	Drug Scaffolds	0.70588	0.55597	2	0.40068
O=C(Cc1ccccc1)OC1CCCCC1	1	Drug Scaffolds	0.6875	0.51585	2	0.40067
O=C(C(CN(C1)C2CCCC2)[C@@H]1c1ccccc1)N(CC1)C[C@@H]1c(cccc1)c1N1CCCCC1	1	Drug Scaffolds	0.45714	0.8075	6	0.40066
O=C(C1CCNCC1)N(C1)Cc2c1cn[nH]2	1	Drug Scaffolds	0.625	0.70595	3	0.40065
C(COc1ccc(C[n](c(-c2ccccc2)c2)c3c2cccc3)cc1)N1CCCCCC1	1	Drug Scaffolds	0.5625	0.77181	5	0.4005
C(c(cc1)cc2c1[nH]cc2)[n]1ncnc1	1	Drug Scaffolds	0.6	0.66755	3	0.40046
O=C(c1ccn[n]1-c1ccccc1)Nc1cc([C@@H](c2ccccc2)NCC2CC2)ccc1	1	Drug Scaffolds	0.5	0.78589	5	0.40044
C(COc1ccc([C@H]2Oc(cccc3)c3-c3c2c2ccccc2nc3)cc1)N1CCC1	1	Drug Scaffolds	0.51613	0.87713	6	0.40034
C(CO[C@H](CCCC1)[C@@H]1N1CCCC1)c1ccccc1	1	Drug Scaffolds	0.6	0.65645	3	0.40034
O=C(c1ccccc1)NC1CNCCC1	1	Drug Scaffolds	0.66667	0.56718	2	0.40033
C(C1)CO[C@@H]1[n]1c(cccc2)c2nc1	1	Drug Scaffolds	0.57143	0.72502	3	0.40021
O=C(Cc1ccccc1)N[C@H](CCCC1)[C@@H]1N1CCCC1	1	Drug Scaffolds	0.57143	0.65645	3	0.40012
C1c(cccc2)c2[Se]NC1	1	Drug Scaffolds	0.6	0.66644	2	0.4001
C(C1)C1(CN[C@H]1c2ccccc2)c2c1[nH]c1c2cccc1	1	Drug Scaffolds	0.47619	0.87338	5	0.40005
O=C1OC[C@H](C2)[C@H]1[C@H](c1ccccc1)c1c2cc2OCOc2c1	1	Drug Scaffolds	0.43478	0.81766	5	0.40003
C(CC1CC2)C[C@H]1[C@H]1[C@H]2C(CCCC2)C2=CC1	6	Drug Scaffolds	0.52941	0.64123	4	0.39997
C(COc1ncccn1)Oc1ncncc1-c1ccccc1	2	Drug Scaffolds	0.63636	0.66071	3	0.3999
O=C(C(c1ccccc1)c1ccccc1)N(CC1)Cc2c1c(OCc1ccccc1)ccc2	1	Drug Scaffolds	0.51515	0.78354	5	0.39969
O=C(C=NN1C2OCCC2)NC1=O	1	Drug Scaffolds	0.61538	0.69536	2	0.39966
C(c1ccccc1)N(CC1)Cc2c1cc[s]2	1	Drug Scaffolds	0.625	0.66348	3	0.39965
O=C(c1ccccc1)NCC(Oc1c2cccc1)=C(Cc1ccccc1)C2=O	1	Drug Scaffolds	0.5	0.81905	4	0.39948
C(c1cccc(-[n]2nnnc2)c1)N[C@@H]1[C@H](c2ccccc2)NCCC1	1	Drug Scaffolds	0.56	0.73945	4	0.39946
O=C(C1=CNC=CC1c1ccccc1)OC/C=C/c1ccccc1	1	Drug Scaffolds	0.625	0.70697	3	0.39938
O=S(c1ccccc1)(N(CC1)CCN1c1ccccc1)=O	1	Drug Scaffolds	0.61905	0.64441	3	0.39937
O=P(OC[C@H](CC1)OC1c1ccc2[n]1ncnc2)Oc1ccccc1	1	Drug Scaffolds	0.64	0.81291	4	0.39936
C(COc1c(Cc2ccccc2)cccc1)N1CCCCC1	1	Drug Scaffolds	0.63636	0.61292	3	0.39931
C(C1)CNc2c1cccc2	1	Drug Scaffolds	0.6	0.66644	2	0.3993
O=C(CN(CCC1)C1=O)Nc1ccccc1	1	Drug Scaffolds	0.625	0.56446	2	0.39919
c([nH]nc1)c1Oc1ccccc1	1	Drug Scaffolds	0.66667	0.54931	2	0.39916
C(c1ncccc1)[n]1c2ncncc2nc1	1	Drug Scaffolds	0.625	0.73114	3	0.39891
O=C(CNC(CNC(NNC([C@H](Cc1ccccc1)NC(CNC(CNC([C@H](CCC1)N1C(CCc1ccccc1)=O)=O)=O)=O)=O)=O)=O)NCCc1c[nH]c2c1cccc2	1	Drug Scaffolds	0.6	0.81096	5	0.39881
C(c1ccccc1)Oc1ncnc2c1nc[nH]2	1	Drug Scaffolds	0.58824	0.71096	3	0.39876
O=C1NC=Nc2c1nc[n]2[C@@H]1O[C@H](COP(O[C@@H](C2)CO[C@H]2N(C=NC=N2)C2=O)=O)CC1	1	Drug Scaffolds	0.59375	0.86725	5	0.39865
O=C(C1=CNC=CC1c1ccccc1)OCCN(CC1)CCN1C(c1ccccc1)c1ccccc1	1	Drug Scaffolds	0.52778	0.75032	5	0.39853
O=C(Cc(cc1)cc2c1OCO2)c([s]cc1)c1S(Nc1ccn[o]1)(=O)=O	1	Drug Scaffolds	0.53846	0.82043	4	0.39845
O=C(CC[C@@]1(CCOc2ccccc2)C2)C=C1c(cc1)c2c2c1[nH]nn2	1	Drug Scaffolds	0.5	0.87401	5	0.39844
C(C(c1ccccc1)c1ccccc1)Oc1ncccn1	2	Drug Scaffolds	0.52381	0.55002	3	0.39833
C=C(CCCC1)/C\1=C\C=C(/CCC1)\C2C1C=CC2	1	Drug Scaffolds	0.55556	0.6621	3	0.39821
O=[P@](COCC[n]1c2ncncc2nc1)(OCC1)O[C@@H]1c1ccccc1	1	Drug Scaffolds	0.61538	0.78354	4	0.39816
O=C(C1=C([C@@H]2OCCC2)S[C@H](C2)N1C2=O)OCC(O1)=COC1=O	1	Drug Scaffolds	0.52174	0.88694	5	0.39799
C(CC1CC2)C[C@H]1[C@H](CC1)[C@H]2c2c1cccc2	9	Drug Scaffolds	0.52941	0.68031	4	0.39795
C(COCc1ccccc1)N(CC[C@@H]1C2)[C@@H]2Cc2c1cccc2	1	Drug Scaffolds	0.65217	0.73701	4	0.39795
O=C(c1ccccc1)NS(c1ccc[s]1)(=O)=O	1	Drug Scaffolds	0.58824	0.64751	2	0.39777
C1N[C@H](C2)[C@@H]1CN2c1cccnc1	1	Drug Scaffolds	0.61538	0.65645	4	0.39765
O=C(c1cc2n[o]nc2cc1)N1CCOCC1	1	Drug Scaffolds	0.58824	0.7268	3	0.39764
B(CC1)Oc2c1cccc2	1	Drug Scaffolds	0.6	0.66644	2	0.39759
O=C(NCc1ccccc1)N(C1)c(nccc2)c2NC1=O	1	Drug Scaffolds	0.57143	0.79602	3	0.39758
C(COc1ccc2-c3ccnc4ccccc34)c3c1c2ncc3	1	Drug Scaffolds	0.47826	0.84008	5	0.39747
C(c1ccccc1)c1cc([C@]2(OC3)OCCCC2)c3cc1	1	Drug Scaffolds	0.57143	0.7971	4	0.39741
O=C(c1ccccc1)OC[C@]([C@@H]1C2)([C@@H]3OC4CC1O3)[C@@]24O[C@@H]1OCCCC1	1	Drug Scaffolds	0.51852	0.90271	12	0.39729
O=C(c1c2cccc1)c(cc(CCC[C@@H]1O[C@@H](CC3)OC[C@H]3OCc3ccccc3)c1c1)c1C2=O	1	Drug Scaffolds	0.57143	0.81997	6	0.39715
O=C(C(c1ccccc1)=CN1Cc2ccccc2)N(CCc2ccccc2)C1=O	1	Drug Scaffolds	0.48276	0.79764	4	0.39714
O=C(CC1)O[C@]1(CC1)C(CC2)[C@H]1[C@@H](CC1)[C@@H]2C(CC2)C1=CC2=O	1	Drug Scaffolds	0.56522	0.73864	5	0.39713
C(c1n[o]cn1)c1ccccc1	1	Drug Scaffolds	0.66667	0.54931	2	0.39701
C(C1)NCCN1c1nc(CCCCCC2)c2c(-c2ccccc2)c1	1	Drug Scaffolds	0.45833	0.82405	3	0.39697
C(COc1ccc([C@@H]([C@H](CC2)c3ccccc3)c3c2cccc3)cc1)N1CCCC1	1	Drug Scaffolds	0.53333	0.73945	5	0.3969
C(CC(C1CC2)c3c[o]cc3)C1[C@H]1[C@H]2C(CCCC2)[C@@H]2CC1	1	Drug Scaffolds	0.54545	0.61292	5	0.39687
C(C1)CSc2c1cccc2	1	Drug Scaffolds	0.6	0.66644	2	0.39686
O=C(CC1)C=C(CC2)[C@@H]1[C@H]1[C@H]2[C@H]2C=CCC2CC1	1	Drug Scaffolds	0.55556	0.66071	4	0.39679
O=C([C@H]1CNCCC1)NNC([C@H](CC[C@H](C1)N2)N1C2=O)=O	1	Drug Scaffolds	0.57143	0.77373	4	0.39668
O=C(c1c(N2)ncc(CCOc3ccnc4ccccc34)c1)Nc1c2nccc1	1	Drug Scaffolds	0.55172	0.86289	5	0.39667
O=C(C=CN1[C@@H]2OCC=C2)NC1=O	2	Drug Scaffolds	0.61538	0.6909	2	0.39653
C([C@@H](c1ccccc1)Nc1nc(-c2ccccc2)c[s]1)C1CC1	1	Drug Scaffolds	0.56522	0.71485	4	0.39653
C1C2(C3)c(cccc4)c4NC2C2N(CC4)C3C1C4C2	1	Drug Scaffolds	0.47368	0.84245	9	0.39648
C=C(c1c(CC2)cccc1)c1c2cccc1	4	Drug Scaffolds	0.5	0.64123	3	0.39631
C(c1ccccc1)c1ccccc1	35	Drug Scaffolds	0.69231	0.34256	2	0.3963
C1Oc(cc(cc2)Sc3nc(cncc4)c4[nH]3)c2O1	1	Drug Scaffolds	0.57895	0.74343	4	0.39624
O=C(c1c(N2)nc(C3(CC4)CCC4CC3)[nH]1)NC2=O	1	Drug Scaffolds	0.52632	0.8024	5	0.39616
C(CCNC1)CC1c1ccccc1	1	Drug Scaffolds	0.61538	0.54381	2	0.3961
O=C(C1)C=CNC1=O	1	Drug Scaffolds	0.625	0.67701	1	0.39609
c(cc1)ccc1Nc1nccc(Oc2ccccc2)n1	1	Drug Scaffolds	0.65	0.63297	3	0.39603
O=C1C=C2C=C[C@@H]([C@H](CCC3)C3CC3)[C@H]3[C@H]2CC1	2	Drug Scaffolds	0.55556	0.67534	4	0.39603
O=C(C[C@H](C1)O[C@@H]2OCCCC2)OCCCCNCCCC[C@@H]1O[C@@H]1OCCCC1	1	Drug Scaffolds	0.43333	0.66485	2	0.39579
C1C[C@@H](O[C@H](CCC2)C[C@H]2O[C@H]2OCCCC2)OCC1	2	Drug Scaffolds	0.65	0.55002	3	0.39577
O=C(c(cc1)cc2c1nc[nH]2)N(CC1)CCC1(Cc1c2[nH]nc1)CC2=O	1	Drug Scaffolds	0.53846	0.8085	5	0.39563
C1CC(OC2COCCC2)OCC1	1	Drug Scaffolds	0.69231	0.55002	2	0.3956
C(COC1)[C@H]1O[C@@H]1OCCCC1	1	Drug Scaffolds	0.66667	0.60182	2	0.39558
c([nH]1)nc2c1ncnc2-c1c(Nc2cccc3c(Nc4ccccc4)nccc23)nccc1	1	Drug Scaffolds	0.48485	0.87927	6	0.39546
O=C(CC1)C(CC2)[C@@H]1[C@H](CC1)[C@H]2C(CC2)C1=CC2=O	1	Drug Scaffolds	0.57895	0.67785	4	0.39543
O=C(Cc1ccccc1)Nc1cc(CC2CC2)ccc1	1	Drug Scaffolds	0.65	0.61678	3	0.39528
O=C(C1)NC=NC1=O	1	Drug Scaffolds	0.625	0.64124	1	0.39524
C1C[C@@H](O[C@H](CCC2)C[C@H]2O[C@H]2OCCCC2)OCC1	4	Drug Scaffolds	0.65	0.59852	3	0.39519
O=C(C[C@H]1C2)N1C=C2S[C@@H]1CNCC1	2	Drug Scaffolds	0.64286	0.69862	4	0.39514
C(c1ccccc1)c1cccc([C@@H]2OCCCC2)c1	2	Drug Scaffolds	0.63158	0.62778	3	0.39483
O=C1OCCN1c1ccccc1	1	Drug Scaffolds	0.58333	0.62294	2	0.39479
O=C(C1(CCOCC1)[N-]S(c1cc(COc2cccc3cccnc23)ccc1)(=O)=O)N1CCNCC1	1	Drug Scaffolds	0.5	0.82714	5	0.39468
[NH2+]=C(C=C1)C=CC1=C(c1ccccc1)c1ccccc1	2	Drug Scaffolds	0.5	0.63962	3	0.39458
C(CC1CC2)C[C@H]1[C@H](CC1)[C@H]2C2C1=CCCC2	1	Drug Scaffolds	0.52941	0.62778	4	0.39445
C(C1)Cc(cccc2)c2-c2c1cccc2	1	Drug Scaffolds	0.53333	0.62778	3	0.39443
O=C1c(cccc2CCC3)c2N3C=C1	1	Drug Scaffolds	0.5	0.77052	3	0.39441
c(cc1)ccc1-c1c(Oc2ccccc2)[s]c2c1cccc2	1	Drug Scaffolds	0.5	0.78413	4	0.39438
O=C(c1ccccc1)NCC1OCCN(Cc2ccccc2)C1	1	Drug Scaffolds	0.65217	0.59852	3	0.39432
C(Cc1c[nH]c2c1cccc2-c1c[nH]nc1CSCc1n[nH]c(CS2)c1)COc1cc2cc2ccccc12	1	Drug Scaffolds	0.42105	0.87338	6	0.3943
C(C(c1ccccc1)c1ccccc1)[C@H]1C[C@H](CC2)[NH2+][C@H]2C1	1	Drug Scaffolds	0.45455	0.64597	5	0.39427
C=C(CCCC1)/C\1=C\C=C(/CCC1)\[C@H]2C1C=CC2	3	Drug Scaffolds	0.55556	0.68273	3	0.39426
C(C1)CNCC1=C(c1ccc[s]1)c1ccc[s]1	1	Drug Scaffolds	0.47059	0.75474	3	0.39409
C(c1ccccc1)c1cccc([C@@]2(OC3)OC3CCC2)c1	1	Drug Scaffolds	0.57143	0.74882	5	0.39391
C(CC1OCCC1)Cc1cccc2ccccc12	1	Drug Scaffolds	0.61111	0.59188	3	0.39389
O=C(C1)c(ccc(O[C@@H]2O[C@H](CO[C@@H]3OCCCC3)CCC2)c2)c2O[C@@H]1c1ccccc1	1	Drug Scaffolds	0.59375	0.80188	5	0.39387
O=C(C=CN1[C@@H](C2)OC[C@H]2OP(OC[C@H](CC2)O[C@H]2[n]2c3ncncc3nc2)=O)NC1=O	2	Drug Scaffolds	0.625	0.87051	5	0.39385
O=S(c1ccccc1)(Nc1ncc[s]1)=O	1	Drug Scaffolds	0.6	0.60067	2	0.39371
O=S(c1ccccc1)(Nc1ncncc1)=O	4	Drug Scaffolds	0.625	0.61292	2	0.39365
O=C(C=C1)c(ccc(N2CCNCC2)c2)c2N1c1ccccc1	1	Drug Scaffolds	0.52174	0.76523	4	0.39365
C(C[n]1cncc1)CN1CCCCC1	1	Drug Scaffolds	0.71429	0.44158	2	0.39332
O=C1O[C@@H]2[C@@H](CCC3)C3=CCC[C@H]2C1	1	Drug Scaffolds	0.5	0.73945	3	0.39327
O=C(CC1)CC(CC2)=C1[C@@H]1[C@@H]2[C@H](CCC2)C2CC1	3	Drug Scaffolds	0.55556	0.68629	4	0.39324
O=C(C1=CNC=C[C@H]1c1ccccc1)O[C@H]1CN(Cc2ccccc2)CC1	1	Drug Scaffolds	0.59259	0.75547	4	0.39309
O=C(C[n]1c(-c2n[o]nc2)nc2c1cccc2)c1ccccc1	1	Drug Scaffolds	0.47826	0.81997	4	0.39305
O=S(c1ccccc1)(Nc1ncccc1)=O	1	Drug Scaffolds	0.625	0.61292	2	0.39291
O=C(C=C1)N(Cc2ncccc2)c(cc2)c1cc2-c1c[o]nc1	1	Drug Scaffolds	0.56522	0.807	4	0.39291
O=C(COCCOCC(NCC(OC(C(C=C1N2Cc3cc4ccccc4nc13)=C(CO1)C2=O)C1=O)=O)=O)NCC(OC(C(C=C1N2Cc3cc4ccccc4nc13)=C(CO1)C2=O)C1=O)=O	1	Drug Scaffolds	0.54545	0.96444	10	0.39283
O=C(c(cccc1)c1Nc1ccccc1)N(C1)CC1[C@H]1NCCCC1	1	Drug Scaffolds	0.6	0.72942	4	0.39276
C(Cc1c([C@H]23)cccc1)[C@H]2NCc1c3cccc1	1	Drug Scaffolds	0.5	0.78175	4	0.39271
O=S1(NCCc2c1[s]cc2)=O	1	Drug Scaffolds	0.45455	0.74622	2	0.39265
O=P(COCC[n]1c2ncncc2nc1)Oc1ccccc1	1	Drug Scaffolds	0.68182	0.70285	3	0.39261
C(C1)[C@H](C2)N(C(c3ccccc3)c3ccccc3)[C@@H]1C[C@H]2c1ncccn1	1	Drug Scaffolds	0.48148	0.73114	6	0.39253
O=C(c1ccccc1)OC1=CC[C@H]([C@@H](Cc2ccc3)NCC4)[C@]44c2c3O[C@@H]14	1	Drug Scaffolds	0.44444	0.9631	6	0.39251
O=S(c1cnc(cc2)[n]1cc2-c1c[nH]nc1)([n]1ncc(nc2)c1cc2-c1c[nH]nc1)=O	1	Drug Scaffolds	0.48387	0.95601	6	0.39251
C(CC1CCC2)C[C@@H]1/C\2=C/C=C1CCCCC1	1	Drug Scaffolds	0.58824	0.62054	3	0.39244
C(c1ccccc1)NC1CCCCC1	2	Drug Scaffolds	0.71429	0.44158	2	0.39241
C1NCC1Nc1cnc([C@H]2NCCc3c2ccc2c3cn[nH]2)cc1	1	Drug Scaffolds	0.58333	0.86391	5	0.39229
O=C(c1ccccc1)O[C@H]1C[C@H](CC2)N[C@H]2C1	1	Drug Scaffolds	0.58824	0.67785	4	0.39209
O=[P@@H](OC[C@H](CC1)OC1c1ccc2[n]1ncnc2)Oc1ccccc1	1	Drug Scaffolds	0.64	0.81291	4	0.39198
C1Nc2cncnc2NC1	1	Drug Scaffolds	0.6	0.70527	2	0.39193
O=C(N[C@@H]([C@@H](CN1)c2ccccc2)C1=O)Nc1ccccc1	1	Drug Scaffolds	0.59091	0.72502	3	0.3918
C(c1ccccc1)c1cccc(C2OCCCC2)c1	2	Drug Scaffolds	0.63158	0.62778	3	0.39167
C(CNCc1ccccc1)C(c1ccccc1)c1ccccc1	1	Drug Scaffolds	0.56522	0.55002	3	0.39154
O=C1N=C(c2ccccc2)c(cccc2)c2N1Cc1cc2nccnc2cc1	1	Drug Scaffolds	0.53571	0.84127	5	0.39143
O=C([C@H](CC1)Nc2ncnc3ccccc23)N1C1CCCCC1	1	Drug Scaffolds	0.56522	0.77933	4	0.39138
C1C[C@H](Oc2ccccc2)OCC1	1	Drug Scaffolds	0.69231	0.51193	2	0.39116
C(C1)C1c(cc1)ccc1-c(nc[nH]1)c1Sc1ncccc1	2	Drug Scaffolds	0.61905	0.73701	4	0.39113
O=C(Nc1ncc[s]1)N(C1CCCCC1)C1CCCCC1	1	Drug Scaffolds	0.47619	0.63297	3	0.39085
O=S(c1ccccc1)(Nc1ncncn1)=O	1	Drug Scaffolds	0.625	0.56169	2	0.39082
O=P(OC1)O[C@@H](C2)[C@@H]1O[C@H]2[n]1c2ncncc2nc1	2	Drug Scaffolds	0.57895	0.84087	4	0.39074
O=C(CC1)C[C@@H](C2)C1[C@@H](CC(C1[C@H]3CCC1)=O)[C@H]3C2=O	1	Drug Scaffolds	0.5	0.62054	4	0.39064
C(C1)CN[C@H]1c1c[nH]c2cncnc12	1	Drug Scaffolds	0.57143	0.76987	3	0.39061
O=C([C@H](C1CCCCC1)NCc1cnccc1)OC1CCCC1	1	Drug Scaffolds	0.52174	0.67908	3	0.39056
C(CNCC1)C1OC(c1ccccc1)c1ncccc1	1	Drug Scaffolds	0.5	0.68031	3	0.39054
O=C(c1ccccc1)NCC1NCCCC1	1	Drug Scaffolds	0.6875	0.56169	2	0.39041
O=C(N1CCNCC1)O[C@@H](c1nccnc1C1=O)N1c1ncccc1	1	Drug Scaffolds	0.48	0.88694	4	0.3903
N=C(C1N2C1)NC2=O	1	Drug Scaffolds	0.625	0.77276	3	0.39024
O=C(/C=C/[C@H]1O[C@@H]1CCCC(CCC1)O[C@H]1C1)OCC/C=C/C=C/C=C/C=C/[C@@H]1O[C@@H]1OCCCC1	1	Drug Scaffolds	0.52778	0.7177	3	0.39024
O=C(C(C(Oc1ccccc1)=O)c1ccccc1)N[C@H]([C@@H]1SCCN11)C1=O	1	Drug Scaffolds	0.48148	0.80188	5	0.39021
O=C(C=CC1=O)N1Nc1nc(-c2ccc[s]2)nc2ccccc12	1	Drug Scaffolds	0.43478	0.79383	4	0.39011
O=C(c1c(C2)cccc1)N2C(CCC(N1)=O)C1=O	1	Drug Scaffolds	0.55556	0.75107	3	0.39008
O=C(c1ccc(CNC(N2CCCC2)=O)cc1)N(CCCC1)c2c1cccc2	1	Drug Scaffolds	0.57143	0.75973	4	0.39006
C(CN1)NC1=Nc1ccccc1	1	Drug Scaffolds	0.66667	0.54931	2	0.39004
C(Cc1ccccc1)CN1CCOCC1	1	Drug Scaffolds	0.73333	0.44158	2	0.38997
C(c1cccc2ccccc12)c1cccc2ccccc12	1	Drug Scaffolds	0.52381	0.55597	4	0.38996
O=C(C(CN1CCOCC1)CC1)c2c1[nH]cc2	1	Drug Scaffolds	0.58824	0.73452	3	0.38994
O=C([C@H](CC1)Nc2ncnc3ccn[n]23)N1C1CCCCC1	1	Drug Scaffolds	0.54545	0.80188	4	0.38992
C([C@@H](CNCC1)[C@H]1c1ccccc1)Oc1ccccc1	1	Drug Scaffolds	0.6	0.64283	3	0.38991
C(CNCC1)C1Nc1ccccc1	1	Drug Scaffolds	0.69231	0.44158	2	0.3899
C(Cc1c[nH]c2c1cccc2)C1CCNCC1	1	Drug Scaffolds	0.64706	0.67534	3	0.3899
O=P(COCC[n]1c2ncnc(NC3CC3)c2nc1)(NCCc1ccccc1)NCCc1ccccc1	1	Drug Scaffolds	0.51351	0.77052	5	0.38982
O=C(c(cc1)ccc1NS(c1cccc2cccnc12)(=O)=O)N1CCN(CC2CC2)CC1	1	Drug Scaffolds	0.59375	0.78295	5	0.38975
C(c1ncccn1)Nc1nc(Nc2ccn[nH]2)ccn1	1	Drug Scaffolds	0.65	0.6621	3	0.38974
C(CN(Cc1ccccc1)c1nc(cccc2)c2[o]1)COc1ccccc1	2	Drug Scaffolds	0.51852	0.72768	4	0.38966
O=S(c1ccccc1)(Nc1ncccn1)=O	5	Drug Scaffolds	0.625	0.56169	2	0.38963
O=C([C@](C1)([C@@H]1C1CCCCC1)c(cc1)ccc1S(C1CC1)(=O)=O)Nc1ncc(SCCN2CCCC2)[s]1	1	Drug Scaffolds	0.51351	0.83396	6	0.3896
C(Cc1ccccc1)CN1CCN(CCOC(c2ccccc2)c2ccccc2)CC1	1	Drug Scaffolds	0.6129	0.59852	4	0.38929
C1CC=C2C=CCCC2C1	1	Drug Scaffolds	0.6	0.59915	2	0.38928
O=C(CCC/C=C/C/C=C\C[C@@H](/C=C/c1c[s]cn1)O1)CCCC1=O	1	Drug Scaffolds	0.56	0.63962	1	0.38926
O=C(C1)NCC1c1cc(OC2CCCC2)ccc1	1	Drug Scaffolds	0.61111	0.65788	3	0.38924
C(CS1)N(C2)C1=N[C@H]2c1ccccc1	1	Drug Scaffolds	0.64286	0.68511	3	0.38915
O=C(c1c2cccc1)c(cc(CCC[C@@H]1O[C@@H](CC3)OC[C@H]3O[C@@H]3OCCCC3)c1c1)c1C2=O	1	Drug Scaffolds	0.55882	0.8218	6	0.38891
C(COc1ccc([C@@H]2Oc(cccc3)c3C=C2c2ccccc2)cc1)N1CCCCC1	1	Drug Scaffolds	0.54839	0.79656	5	0.3888
C(CNCC1c2ccccc2)c2c1cccc2	1	Drug Scaffolds	0.52941	0.63466	3	0.38877
O=C(c1n[nH]c2c1cccc2)NC1CC(CCC2)NC2C1	1	Drug Scaffolds	0.57143	0.74499	4	0.38875
O=C([C@@H](Cc(cc1)cc2c1[nH]nc2)NC(N(CC1)CCC1C1=Cc(cccc2)c2NC1=O)=O)N(CC1)CCN1C1CCNCC1	1	Drug Scaffolds	0.48889	0.85413	7	0.38864
O=C(c1ccccc1)c(cccc1)c1NCCc(cc1)ccc1OCC[n]1c(cccc2)c2c2c1cccc2	1	Drug Scaffolds	0.5641	0.77994	6	0.38848
O=C(c(cc1)cc(N2)c1OCC2=O)N1c(cccc2)c2OCC1	1	Drug Scaffolds	0.52174	0.78115	4	0.38843
O=C(NCc1ccccc1)N(CCNC1)[C@H]1c1ccccc1	1	Drug Scaffolds	0.59091	0.67908	3	0.38836
c(cc1)ccc1-c(c(-c1ccccc1)n1)c2[n]1nccc2	1	Drug Scaffolds	0.47619	0.82626	4	0.38827
C=C(C1)O[C@H](C2)N1C2=O	1	Drug Scaffolds	0.66667	0.77003	3	0.38819
O=C(c1ccccc1)N(Cc1[nH+]cccc1)C(OCCCOC(N1CCCCC1)=O)=O	1	Drug Scaffolds	0.54839	0.71389	3	0.3881
O=C1N=CC=CN1[C@@H]1SCOC1	1	Drug Scaffolds	0.58333	0.71278	2	0.38806
O=C(CON=C1c(cccc2)c2-c2c1cccc2)OC(C(C=C1N2Cc3cc4ccccc4nc13)=C(CO1)C2=O)C1=O	1	Drug Scaffolds	0.47619	0.98951	8	0.38794
O=C(c1cc[nH+]cc1)NCc1ccccc1	1	Drug Scaffolds	0.6875	0.4995	2	0.38791
O=C(COC(CCC1CCCC1)=O)C(CC1)C(CC2)[C@@H]1[C@H](CC1)[C@H]2C(CC2)C1=CC2=O	1	Drug Scaffolds	0.6129	0.72141	5	0.3879
O=C1NC(c2cccc(S(N3CCNCC3)(=O)=O)c2)=Nc2c1[nH]cc2	1	Drug Scaffolds	0.52	0.82494	4	0.38787
O=C(N1CCCCC1)N(CC1)Cc2cccc3c2[n]1cc3C(C(N1)=O)=C(c2cnc3[n]2cccc3)C1=O	1	Drug Scaffolds	0.48649	0.98782	7	0.3877
O=C(C1CC1)OC1CCNCC1	1	Drug Scaffolds	0.66667	0.51517	2	0.38759
C(C1)COc2c1cccc2	7	Drug Scaffolds	0.6	0.66644	2	0.38752
O=C(C(C1CCCCC1)c1ccccc1)OCC1=NCCCN1	1	Drug Scaffolds	0.52174	0.69646	3	0.38752
C([C@H]1NCCC1)Oc1cnccc1	1	Drug Scaffolds	0.69231	0.52337	2	0.3874
C(c1ccccc1)c1nc2c(CCCC3)c3ccc2cc1	1	Drug Scaffolds	0.57143	0.77181	4	0.38731
O=C(Cc1ccccc1)OCCN1CC(c2ccccc2)OCC1	1	Drug Scaffolds	0.66667	0.62953	3	0.38721
C(CC(c1ccccc1)c1ccccc1)CN(C1)CC1Oc1ccccc1	1	Drug Scaffolds	0.59259	0.60279	4	0.38716
O=C(Cc1c[s]cc1)N[C@@H]([C@H]1SCCN11)C1=O	2	Drug Scaffolds	0.58824	0.74343	4	0.3871
O=C(CC(c1ccccc1)c1ccccc1)N(CC1)CCN1C(c1ccccc1)c1ccccc1	1	Drug Scaffolds	0.45714	0.6715	5	0.38692
O=C([C@]1(CC[C@@H](CCN2CCOCC2)CC1)c1c2cccc1)N2S(c1ccccc1)(=O)=O	1	Drug Scaffolds	0.53125	0.90245	5	0.38681
C([C@H](CNCC1)[C@@H]1c1ccccc1)Oc(cc1)cc2c1OCO2	1	Drug Scaffolds	0.56522	0.70595	4	0.38676
O=C(c(nc([C@@H]1[C@H](C2)[C@@H]3O[C@@H]3[C@H]2C1)[nH]1)c1N1)NC1=O	1	Drug Scaffolds	0.52632	0.87275	8	0.38674
C(CN1c(cccc2)c2Sc2c1cccc2)C1NCCCC1	1	Drug Scaffolds	0.5	0.70798	4	0.3867
C(c1ccccc1)Nc1ncnc2c1nc[nH]2	1	Drug Scaffolds	0.58824	0.67407	3	0.38634
O=C(Cc1cnccc1)c1cnccc1	1	Drug Scaffolds	0.66667	0.56446	2	0.38633
O=C1N(CCCc2ccc3)c2c3N1	1	Drug Scaffolds	0.46154	0.77687	3	0.38632
C([C@H]1OCCCC1)O[C@H]1OCCCC1	1	Drug Scaffolds	0.71429	0.53731	2	0.38631
O=C(CSc1ccncc1)N[C@@H]([C@H]1SCC=CN11)C1=O	1	Drug Scaffolds	0.65	0.75547	3	0.38624
O=C(c1c2[nH+]c[n]1Cc1nccnc1)c(cccc1)c1C2=O	1	Drug Scaffolds	0.54545	0.87338	4	0.38615
C(/C(\c1ccccc1)=N\OCc1ccccc1)[n]1cncc1	1	Drug Scaffolds	0.54545	0.64441	3	0.38601
C(C1)C(C[C@@H]2c3ccccc3)NC1[C@H]2c1cc(-c2ccccc2)n[o]1	1	Drug Scaffolds	0.52	0.84008	6	0.38572
C(c1ccccc1)Nc1nc2ccccc2c(N2CCCCC2)c1	1	Drug Scaffolds	0.54167	0.75761	4	0.3857
C(c1ccccc1)[n](cc1)c2c1cccc2	2	Drug Scaffolds	0.625	0.66621	3	0.38562
O=C(C1(CC1)c(cc1)cc2c1OCO2)Nc(cc1)cc2c1[nH]cc2	2	Drug Scaffolds	0.54167	0.78175	5	0.38559
C(c1ccccc1)[n](c1c2CCNCC1)nc2-c1ccccc1	1	Drug Scaffolds	0.52174	0.82757	4	0.38558
C(COCC[N+]1(Cc2ccccc2)CCOCC1)C1C(C2)CC2CC1	1	Drug Scaffolds	0.6	0.57505	5	0.38551
C(C[C@H]1C2)C[C@@H]1c1c3N2CCNCc3ccc1	1	Drug Scaffolds	0.47059	0.80343	4	0.38547
O=S(CCC1)(c2c1cc[s]2)=O	1	Drug Scaffolds	0.45455	0.74622	2	0.38541
O=C1OCC(c2ccccc2)=C1c1ccccc1	1	Drug Scaffolds	0.55556	0.67407	3	0.38539
O=C(C(c1c[nH]c2c1cccc2)=C1c2c[nH]c3c2cccc3)NC1=O	1	Drug Scaffolds	0.48	0.83887	5	0.38538
c1cnc[n]1C(c1ccccc1)c(cc1)ccc1-c1ccccc1	1	Drug Scaffolds	0.54167	0.655	4	0.38526
O=S(c1cnccc1)(N(Cc1ccccc1)Cc(cc1)ccc1-[n]1nccc1)=O	1	Drug Scaffolds	0.48276	0.72232	4	0.3852
O=C([C@H](CNC1)[C@@H]1c1ccccc1)N(CC1)CCC1c1ccccc1	1	Drug Scaffolds	0.6	0.70798	4	0.38512
O=C(C(CC(C1)C2)(CC1C1)CC21c1ccccc1)NCc1ccncc1	1	Drug Scaffolds	0.53846	0.66755	6	0.38506
O=C(c1c(N2C[C@@H](c3ccccc3)OC3CCOCC3)[s]c(-c3ncc[o]3)c1)NC2=O	1	Drug Scaffolds	0.45161	0.90526	5	0.38492
O=C(CC1)NC(c2ccccc2)S1(=O)=O	1	Drug Scaffolds	0.53333	0.67908	2	0.3849
O=C(c1ccccc1)OC1CC(CC2)NC2C1	1	Drug Scaffolds	0.58824	0.62953	4	0.38488
C(C1)N1c1ccccc1	1	Drug Scaffolds	0.66667	0.47958	2	0.3848
C(C1)[C@H](C2)N[C@@H]1C[C@@H]2Nc1nc(Nc2n[nH]cc2)cc2ncccc12	1	Drug Scaffolds	0.48	0.80446	6	0.3847
C1NC[C@H](c2ccccc2)OC1	1	Drug Scaffolds	0.66667	0.59725	2	0.38461
O=C(c(cccc1)c1-[n]1nccn1)N(CCC1)CCN1c1nc(cccc2)c2[o]1	2	Drug Scaffolds	0.51724	0.80998	5	0.3846
O=C(c(ccc(N1CCN(CC(CCCC2)=C2c2ccccc2)CC1)c1)c1Oc1cnc2[nH]ccc2c1)NS(c(cc1)ccc1NCC1CCOCC1)(=O)=O	1	Drug Scaffolds	0.50909	0.88837	8	0.3846
O=C(CN1)NCC1=O	1	Drug Scaffolds	0.75	0.44794	1	0.38456
C(c1ccccc1)c1cccc(C2SCCCC2)c1	1	Drug Scaffolds	0.63158	0.62778	3	0.38456
O=C(N(CC(CCCC1)=C1c1ccccc1)C1)O[C@@H]1c1ccccc1	1	Drug Scaffolds	0.56	0.78589	4	0.38451
C=C(CCCC1)/C\1=C\C=C1\[C@H](CCC2)C2CCC\1	13	Drug Scaffolds	0.55556	0.65055	3	0.38448
O=C([C@@H](c1ccccc1)NC(N(CCNC1=O)C1=O)=O)N[C@@H]([C@H]1SCCN11)C1=O	1	Drug Scaffolds	0.44828	0.82134	5	0.38441
O=S(c1ccccc1)(Nc1nnccc1)=O	1	Drug Scaffolds	0.625	0.61292	2	0.38437
C([C@@H]1NCC1)Oc1cnccc1	1	Drug Scaffolds	0.75	0.56687	2	0.38419
C(c1ccccc1)[n](c1c2cccn1)nc2-c1ncccn1	2	Drug Scaffolds	0.54545	0.82225	4	0.38414
C(CC1)CN1c1nc(-c2cnccc2)cc(N2[C@@H](C3)CO[C@@H]3C2)n1	1	Drug Scaffolds	0.45833	0.82626	6	0.38407
C(CN1CCCCC1)c1nc(CC(c2ccccc2)c2ccccc2)n[o]1	1	Drug Scaffolds	0.55556	0.6715	4	0.38406
O=C(COC(CNC([C@@H](Cc(cc1)ccc1N1CCOCC1)OC(CNC(COC(CNC([C@@H](Cc(cc1)ccc1N1CCOCC1)O1)=O)=O)=O)=O)=O)=O)NCC1=O	1	Drug Scaffolds	0.53448	0.70075	4	0.38405
C1[C@](CC2)(CN2c2ncnc3c2cc[nH]3)NC1	1	Drug Scaffolds	0.52941	0.79105	4	0.38387
O=C(Nc1ccccc1)Nc1cccc(S([C@@H]2CNCCC2)(=O)=O)c1	1	Drug Scaffolds	0.6	0.71194	3	0.38372
O=C(C1CC1)O[C@@H](C1)C=CC1=O	1	Drug Scaffolds	0.66667	0.60182	2	0.38362
C(c(cccc1)c1-[n]1nccc1)Oc1ncnc(-c2ccccc2)c1	2	Drug Scaffolds	0.56	0.7659	4	0.38353
C(CN(CC1)c2ncncn2)N1C(c1ccccc1)c1ccccc1	1	Drug Scaffolds	0.52	0.62778	4	0.38352
C(CN1CCCCC1)Nc1ncccc1	1	Drug Scaffolds	0.73333	0.49511	2	0.3835
O=C(Cc1ccccc1)c1ccccc1	2	Drug Scaffolds	0.66667	0.48104	2	0.38348
O=S(c1ccccc1)(Nc1ccccc1)=O	4	Drug Scaffolds	0.625	0.56169	2	0.38321
C([C@@H]1Oc(cccc2)c2OC1)N(CC1)CCN1c1ncccc1	2	Drug Scaffolds	0.65217	0.69646	4	0.38308
O=C(c(cc1)cc2c1c(C1CCCC1)c(-c1ncccn1)[nH]2)NC1(CCC1)c1nc(cccc2)c2[nH]1	1	Drug Scaffolds	0.47222	0.90702	7	0.38305
C([C@@H]1CNC2)[C@]12c1cc2ccccc2cc1	1	Drug Scaffolds	0.5625	0.6715	5	0.38305
C(c1ccncc1)c(c1ccccc11)nnc1Nc1ccccc1	1	Drug Scaffolds	0.58333	0.76455	4	0.38301
C(COCCOCC1OC1)OCCOCC1OC1	1	Drug Scaffolds	0.88889	0.25597	2	0.38283
C(CC1)C[C@H]2N1CCc1c2cccc1	3	Drug Scaffolds	0.57143	0.71096	3	0.38279
O=C(CN(c(cccc1)c1S1)C1=O)N1CCNCC1	1	Drug Scaffolds	0.57895	0.74264	3	0.38259
C(CC1CCC2)C[C@H]1/C\2=C/C=C1CCCCC1	2	Drug Scaffolds	0.58824	0.62054	3	0.3825
O=C(N(c1ccccc1)c1ccccc1)OCC1CCCCC1	1	Drug Scaffolds	0.52174	0.60487	3	0.38239
O=C(c1ccccc1)N(CCN(CC1)CCN1c1c2OCCOc2ccc1)c1ncccc1	1	Drug Scaffolds	0.51515	0.79977	5	0.38231
O=C(CCc1cccc2ccccc12)Nc(cccc1)c1C(N1CCC2(CCCC2)CC1)=O	1	Drug Scaffolds	0.54545	0.76251	5	0.38223
O=C(c1c2cccc1)c(cc(CCC[C@@H]1O[C@@H](CC3)OC[C@H]3O[C@H]3OCCCC3)c1c1)c1C2=O	1	Drug Scaffolds	0.55882	0.82405	6	0.38215
C(CN1CCCCC1)C=C(c1ccc[s]1)c1ccc[s]1	2	Drug Scaffolds	0.55	0.68153	3	0.38213
O=C(c1nnc[o]1)NCC(N1)=NC(C(NCc2ccccc2)=O)=CC1=O	1	Drug Scaffolds	0.61538	0.74499	3	0.38201
C(COC(c1ccccc1)c1ccccc1)N1CCCCC1	1	Drug Scaffolds	0.54545	0.55886	3	0.38198
O=C(c1c2cccc1)N([C@H](CCC1[C@]34CCN(CC5CC5)C1C1)C3Oc3c4c1ccc3)C2=O	1	Drug Scaffolds	0.42424	0.95725	8	0.3819
C([C@@H](CNCC1)[C@H]1c1ccccc1)Oc(cc1)cc2c1OCO2	1	Drug Scaffolds	0.56522	0.69969	4	0.38187
c(cc1)ccc1Oc1ncccc1	1	Drug Scaffolds	0.69231	0.50377	2	0.38184
O=S(c1cnccc1)(N(Cc(cc1)ccc1-[n]1nccc1)Cc1ncccc1)=O	1	Drug Scaffolds	0.48276	0.76455	4	0.38183
O=C(CC1=CCC=CC1)N[C@@H]([C@H]1SCC=CN11)C1=O	1	Drug Scaffolds	0.63158	0.76921	3	0.38183
O=C(c(cc1)cc(N(C2)C[C@H](CC3)[C@@H]3C/C=C/CCC3)c1OC[C@@]2(CCC1)c2c1cccc2)NS3(=O)=O	1	Drug Scaffolds	0.40541	0.87275	5	0.38177
O=C(C1CCCCC1)N[C@@H]([C@H]1SCCN11)C1=O	1	Drug Scaffolds	0.58824	0.73701	4	0.38152
C(Cc1ccccc1)Cc1ccccc1	1	Drug Scaffolds	0.73333	0.34256	2	0.38149
O=C(CCN1CCCCC1)c1ccccc1	3	Drug Scaffolds	0.6875	0.50377	2	0.38121
O=C([C@H]1N(CN[C@@H]2c3ccccc3)C2=O)N2[C@@H]1SCC2	1	Drug Scaffolds	0.55	0.83144	5	0.3812
O=C(c(cc1)ccc1N1CCN(CC(CCCC2)=C2c2ccccc2)CC1)NS(c(cc1)ccc1N[C@H](CCN1CCOCC1)CSc1ccccc1)(=O)=O	1	Drug Scaffolds	0.54545	0.82043	7	0.38119
O=C(Cc1ccccc1)N[C@@H]([C@H]1SCCN11)C1=O	7	Drug Scaffolds	0.61111	0.73369	4	0.38119
O=C1OC(COc2ccccc2)CN1	2	Drug Scaffolds	0.71429	0.51585	2	0.38115
N=C1O[N-][N+](N2CCOCC2)=C1	1	Drug Scaffolds	0.66667	0.61893	2	0.38104
O=C(CCc1ccccc1)N(Cc1ncc(-c2ccccc2)[nH]1)Cc1ccccc1	1	Drug Scaffolds	0.53333	0.72049	4	0.38102
O=C(C1=C(CCCC2)[C@H]2[C@H](C2)N1C2=O)OCOC(OC1CCCCC1)=O	1	Drug Scaffolds	0.57692	0.8762	5	0.38095
O=C(C1=CC=C2Nc3ncncc3)NC3(CCCCC3)N1C2=O	1	Drug Scaffolds	0.52174	0.8737	4	0.38088
O=C([C@@](C1)([C@@H]1/C=C\CCCCCCC(N(C1)[C@H]2C[C@H]1OC(N(C1)Cc3c1cccc3)=O)=O)NC2=O)NS(C1CC1)(=O)=O	1	Drug Scaffolds	0.42857	0.89007	5	0.38068
O=C(c(cc1)ccc1NCc(cn1)nc2c1N=CNC2=O)NCCNC(Nc1cc(C(OC23c(cccc4)c4Oc4c2cccc4)=O)c3cc1)=S	1	Drug Scaffolds	0.54902	0.90974	8	0.38062
O=C(CN1c2cc(CCCC3)c3cc2)NS1(=O)=O	1	Drug Scaffolds	0.55556	0.75107	3	0.38061
C(CC1)CC1Oc1cc(CC[C@@H]2[C@@H]3CCC4[C@H]2CCC4)c3cc1	2	Drug Scaffolds	0.56522	0.72413	5	0.38059
C(CN1CCCC1)c1ccccc1	2	Drug Scaffolds	0.69231	0.42063	2	0.38056
C(C1)CNCC1Nc1ncnc2c1cc[nH]2	1	Drug Scaffolds	0.5625	0.70798	3	0.38053
O=C(Cc1ccccc1)NCc(cccc1)c1N1CCCCC1	1	Drug Scaffolds	0.6087	0.6715	3	0.38048
O=C(c1c2cccc1)c(cc(CCC[C@@H]1O[C@@H]3OCCCC3)c1c1)c1C2=O	7	Drug Scaffolds	0.51852	0.80343	5	0.38045
O=C1c2c(cc(/C=N/N(CC3)CCC3NC3(CC3)[C@H](CC3)CN3C(C=CN34)=CC3=C(C3CC3)C=CC4=O)c(N3)c4)c4ccc2OC1O/C=C\CCCCCCCC/C=C\C=C/C3=O	1	Drug Scaffolds	0.47619	0.95242	9	0.38037
C1Oc(cc(cc2)Sc([nH]3)nc4c3ncnc4)c2O1	2	Drug Scaffolds	0.57895	0.74577	4	0.38011
O=C(C[C@@H](c1nnc[n]1-c1c2cc[s]1)N=C2c1ccccc1)Nc1ccccc1	1	Drug Scaffolds	0.48276	0.89959	5	0.3801
O=C(c(cc1)c(N2CCCC2)nc1-[n]1nccc1)NS(c1c[nH]nc1)(=O)=O	1	Drug Scaffolds	0.48148	0.84401	4	0.38009
O=C(C1CCCCC1)Nc1ncccc1	1	Drug Scaffolds	0.66667	0.57758	2	0.37999
C(c(cc1)ccc1-c1c(-c2ccccc2)[o]nc1)N1CCOCC1	1	Drug Scaffolds	0.625	0.7177	4	0.37995
C(C(C[n]1nnnc1)c1ccccc1)c(cc1)ncc1-c1ccccc1	1	Drug Scaffolds	0.53846	0.73864	4	0.37975
O=C(C(c1ccccc1)c1ccccc1)O[C@@H]1C[C@H](CC2)[N+]3(CCCC3)[C@H]2C1	1	Drug Scaffolds	0.46429	0.74499	6	0.37973
O=C(C=CN1[C@@H]2OC(CO[P@@H](Oc3ccccc3)=O)CC2)NC1=O	1	Drug Scaffolds	0.66667	0.75903	3	0.3797
C(CC(c1ccccc1)c1ccccc1)CN1CCCCC1	1	Drug Scaffolds	0.54545	0.53731	3	0.37965
O=C1OCC([C@@H](CC2)C(CC3)C2[C@H](CC2)[C@H]3C(CC3)C2C[C@H]3O[C@@H]2OCCCC2)=C1	1	Drug Scaffolds	0.6	0.72141	6	0.37952
C1[C@H](c2ccccc2)NC[C@@H]1c(cc1)cc2c1OCO2	1	Drug Scaffolds	0.6	0.71863	4	0.37952
O=C(c1ccccc1)NCC(N1Cc2ccccc2)=Nc(cccc2)c2C1=O	1	Drug Scaffolds	0.5	0.77373	4	0.3794
O=C(c1ccccc1)N(C1)c(cccc2)c2S1(=O)=O	1	Drug Scaffolds	0.52632	0.78648	3	0.37936
O=C(CN(C1=C2CCC1)C(SCc1ccccc1)=NC2=O)NCc(cc1)ccc1-c1ccccc1	1	Drug Scaffolds	0.57143	0.8591	5	0.37935
C(c1ccccc1)[n]1c(cccc2)c2c(-c2ccccc2)c1	1	Drug Scaffolds	0.54545	0.76657	4	0.3793
O=C1N(Cc2cc(cccc3)c3[nH]2)c(cncc2)c2N1	1	Drug Scaffolds	0.55	0.80599	4	0.37915
O=C1NC=NC2=C1NCCN2	1	Drug Scaffolds	0.54545	0.73445	2	0.37914
O=C(c1ccccc1)N[C@@H](CCN1C[C@H](CCCC2)[C@H]2CC1)CSc1ccccc1	1	Drug Scaffolds	0.5	0.68273	4	0.37912
C(CC1)CC1c1cc(CCCC2)c2cc1	1	Drug Scaffolds	0.6	0.59634	3	0.37907
C(c1c(C2CC2)[o]nc1-c1ccccc1)Oc1ccc(C(C2)CN2c2ncccc2)cc1	1	Drug Scaffolds	0.59375	0.80899	6	0.37902
O=C([C@@H](CN(CC1)c2nc(nc(C3CC3)nc3)c3[s]2)N1S(c1ccccc1)(=O)=O)NCc1ccccc1	1	Drug Scaffolds	0.45946	0.87051	6	0.37901
O=C([C@H](C1)ON=C1c1nccc2ccccc12)N[C@@H](C1)COC1=O	1	Drug Scaffolds	0.58333	0.80395	4	0.37892
O=C(c([s]c1c2cccc1)c2Oc1ccccc1)c1ccccc1	1	Drug Scaffolds	0.5	0.82043	4	0.37886
O=C1C[C@H]2OCCC[C@@H]2C1	2	Drug Scaffolds	0.6	0.64378	2	0.37878
C(c1c[nH]nc1O[C@@H]1OCCCC1)c1ccccc1	1	Drug Scaffolds	0.63158	0.69646	3	0.37876
C(c1cnc(c(CN2CCOCC2)c2)[n]1nc2Nc1n[nH]cc1)c1ccccc1	1	Drug Scaffolds	0.48276	0.86187	5	0.37875
O=C1OC=C([C@@H]2C(CC[C@H]3[C@H]4CCC5C3CCCC5)[C@@]43O[C@@H]3C2)C=C1	1	Drug Scaffolds	0.56	0.81435	7	0.37869
O=C1OCC2=C1CCC1[C@]34O[C@H]3[C@@H]3O[C@@H]3C[C@@]43O[C@H]3C[C@@H]21	2	Drug Scaffolds	0.47619	0.90064	10	0.37868
C=C1[C@@H](CCC2=CCOC2=O)C(CCCC2)[C@@H]2CC1	1	Drug Scaffolds	0.52632	0.62054	3	0.37857
O=C(CCCCCN(C(C=C1)=O)C1=O)N/N=C/C(C[C@@H](c1c2)O[C@@H]3OCCCC3)Cc1cc(C(c1c3cccc1)=O)c2C3=O	1	Drug Scaffolds	0.5	0.84935	6	0.37839
O=C(C(CC1)N1C(c1c[s]c2c1cccc2)=O)NCc1ccccc1	1	Drug Scaffolds	0.6	0.80135	4	0.37811
O=C1N(Cc(cc2)ccc2-c(cccc2)c2-c2nnn[nH]2)C=NC=C1	1	Drug Scaffolds	0.56	0.75402	4	0.37809
O=C(CCCCCC[C@H]1O[C@H]1C[C@@H](c(cc1)cc2c1[s]cn2)O1)CCCC1=O	1	Drug Scaffolds	0.5	0.77245	3	0.37795
O=C(C=C1)NN=C1Oc(cc1)ccc1N(C(N1)=O)N=CC1=O	1	Drug Scaffolds	0.68182	0.72141	3	0.37794
C(C1)NCCN1C1=Nc(cccc2)c2Sc2c1cccc2	2	Drug Scaffolds	0.47619	0.78821	4	0.37791
O=C(Nc1n[o]cc1)Nc1cc(Oc2ncnc3ccccc23)ccc1	1	Drug Scaffolds	0.57692	0.75832	4	0.37787
O=C1NC(Cc2ncccc2)=Nc2c1cn[n]2C1CCOCC1	1	Drug Scaffolds	0.56522	0.85046	4	0.37781
C(c1ncccc1)[n]1c2cc(-c3c[o]nc3)cnc2c(-c2ccccc2)c1	1	Drug Scaffolds	0.44444	0.88492	5	0.37779
O=C(N(Cc(cccc1)c1-c1ccccc1)C1)O[C@@H]1c1ccccc1	1	Drug Scaffolds	0.56	0.75402	4	0.37769
O=C1c([s]cc2)c2NC(NCCCN[C@H]2c(cccc3)c3OCC2)=C1	1	Drug Scaffolds	0.6	0.81047	4	0.37763
O=C(c(cc1)ccc1-[n]1nccc1)N(CCCC1)c2c1cccc2	1	Drug Scaffolds	0.54167	0.77052	4	0.37758
O=C1C=CC[C@@H](C[C@H]2Cc3c4cccc3)C1C=C2C4=O	4	Drug Scaffolds	0.5	0.81719	4	0.37754
O=C([C@H]1NC[C@H]2[C@@H]1C2)NCC[C@H](CCN1)C1=O	1	Drug Scaffolds	0.58824	0.65205	4	0.37754
O=C(C1CCCCC1)Nc1ccccc1	1	Drug Scaffolds	0.66667	0.52337	2	0.37749
C(C1)C(c2ccccc2)[n]2c1cnc2	1	Drug Scaffolds	0.57143	0.70285	3	0.3774
O=C(CCC1N(C=Nc2c3cccc2)C3=O)NC1=O	1	Drug Scaffolds	0.57895	0.79764	3	0.37735
O=C(c(cc1)cc2c1[nH]nn2)NCC1NCCC1	1	Drug Scaffolds	0.61111	0.69862	3	0.37722
C=C1CCCC1	1	Drug Scaffolds	0.66667	0.3662	1	0.37721
C(c1n[nH]c2c1cccn2)[n](c1ccc2)ncc1c2Oc1ccccc1	1	Drug Scaffolds	0.57692	0.8486	5	0.37718
C1[C@](CC2)(CC=C(C3)[C@@H]2[C@H]2[C@H]3C(CCCC3)[C@@H]3CC2)O[C@H]2[C@H]1NCCC2	1	Drug Scaffolds	0.53846	0.80899	6	0.37717
O=C1c(cccc2C3CNCC3)c2OC(c2ccccc2)=C1	2	Drug Scaffolds	0.5	0.81625	4	0.37714
O=C(c1c(NCc2ccncc2)nccc1)Nc1cc(NCC2)c2cc1	1	Drug Scaffolds	0.57692	0.75903	4	0.37707
O=C1C=C(CCCc2c3cccc2)C3=CC=C1	1	Drug Scaffolds	0.52941	0.77373	3	0.37697
O=C1NC=Nc2c1[nH]cc2[C@@H]1NCCC1	1	Drug Scaffolds	0.53333	0.81194	3	0.3769
O=C(N[C@@H]1C[C@H](CC2)N[C@H]2C1)N(c(cccc1)c1N1)C1=O	1	Drug Scaffolds	0.52381	0.75832	5	0.37689
O=S(/C=C/c1ccccc1)(Nc1nc(-c2ncccn2)ncc1Oc1ccccc1)=O	1	Drug Scaffolds	0.48387	0.75903	4	0.3766
O=C(NC=C1)N=C1NS(c1ccccc1)(=O)=O	1	Drug Scaffolds	0.58824	0.64441	2	0.3766
S=C1N([C@H](C2)COc3c2cccc3)C(CCNCc2ccccc2)=CN1	1	Drug Scaffolds	0.61538	0.7971	4	0.37639
O=C(COc(cc1)cc(S(NCC2)(=O)=O)c1N2c1ccccc1)NCc1ccccc1	1	Drug Scaffolds	0.58065	0.8003	4	0.37634
C(C1)C[n]2c(N3CCNCC3)nc3c2c1ccc3	1	Drug Scaffolds	0.5	0.83313	4	0.37625
O=C(N1Cc2ccccc2)N(c2cccc3ccccc23)SC1=O	1	Drug Scaffolds	0.54167	0.78115	4	0.37624
O=C1[C@@H]2C(CCCC3)[C@H]3CC[C@H]2[C@H](CCC2)C2C1	1	Drug Scaffolds	0.5	0.55002	4	0.37618
O=C1SCCN1	1	Drug Scaffolds	0.66667	0.69315	1	0.376
O=C1N2C=C(S[C@@H](CC3)CS3=O)S[C@@H]2C1	2	Drug Scaffolds	0.66667	0.71675	4	0.37578
C(CC1CC2)C[C@H]1[C@H](CC1)[C@H]2C2[C@@]11O[C@@H]1C=CC2	1	Drug Scaffolds	0.5	0.74577	6	0.37576
O=C1N2C=C([C@@H]3OCCC3)S[C@@H]2C1	1	Drug Scaffolds	0.61538	0.74264	4	0.37564
O=C(c1cc(OCC2CC2)ccc1)O[C@@H](Cc1ccncc1)c1cc(OCC2CC2)ccc1	1	Drug Scaffolds	0.51515	0.72232	5	0.3756
C(C1)C1c1c[nH]cn1	1	Drug Scaffolds	0.625	0.7083	2	0.37541
O=C([C@H](c1ccccc1)NCc1ccccc1)OC1CCCC1	1	Drug Scaffolds	0.52174	0.65205	3	0.37541
O=C(C1CC1)N([C@H](CC1)C2)[C@@H]1CN2c1nc(Nc2c[nH]nc2)ncc1	1	Drug Scaffolds	0.56	0.79548	6	0.3754
C(C1)C1c1ccccc1	6	Drug Scaffolds	0.66667	0.47958	2	0.37538
C(COc(cc1)ccc1Oc1c(-c2ccccc2)[s]c2c1cccc2)N1CCCCC1	1	Drug Scaffolds	0.58065	0.80083	5	0.37534
O=C(c1c(CCC2)c2c2[nH]c(cccc3)c3c2c11)N(CN2CCNCC2)C1=O	1	Drug Scaffolds	0.46429	0.92082	6	0.37525
C1C[C@@H](O[C@@H](CCC2)C[C@@H]2O[C@H]2OC=CCC2)OCC1	3	Drug Scaffolds	0.65	0.62054	3	0.37517
O=C1Oc(cc(cc2)O[C@H]3C[C@H](CC4)N[C@H]4C3)c2C=C1	1	Drug Scaffolds	0.55	0.74806	5	0.37509
C1OCCOc2cc3c(Nc4ccccc4)ncnc3cc2OCCOC1	1	Drug Scaffolds	0.55556	0.78531	3	0.37508
O=C(c1cc(cccc2)c2[o]1)N[C@@H]1C(CC2)CCN2[C@H]1Cc1cnccc1	1	Drug Scaffolds	0.51852	0.82887	6	0.37503
C(C1OCCNC1)Oc1c(CC=C2)c2ccc1	1	Drug Scaffolds	0.58824	0.70798	3	0.37502
O=C(CCCNC([C@H]([C@H](c1c[nH]cn1)O[C@@H]1OCCC[C@@H]1O[C@H]1OCCCC1)NC(c1ncncc1)=O)=O)NCC(NCCc1nc(-c2ncc[s]2)c[s]1)=O	1	Drug Scaffolds	0.50909	0.9112	6	0.37496
C(Cc1ccccc1)C[n]1c(-c2ccncc2)c(-c2ccccc2)nc1	1	Drug Scaffolds	0.53846	0.76043	4	0.37488
c(cc1)ccc1-c(cccc1)c1-c1nnn[nH]1	1	Drug Scaffolds	0.52941	0.70181	3	0.37485
C(C1)CNC1c1nc(cccc2)c2[nH]1	1	Drug Scaffolds	0.57143	0.70898	3	0.37479
C(c1ccccc1)[n]1c2ncccc2cc1	2	Drug Scaffolds	0.625	0.70492	3	0.37476
O=C1N2c(cccc3)c3C(c3ccccc3)=NCC2=N/C\1=C\N1CCNCC1	1	Drug Scaffolds	0.53571	0.87713	5	0.37474
O=C(CCC1)OCC/C=C/C=C/CCCCC1O[C@H](CC1)OC[C@@H]1O[C@H]1OCCCC1	1	Drug Scaffolds	0.6129	0.64904	2	0.37474
O=C(c1ccccc1)O[C@H](C1CC(C2)=CCC1)[C@H](C1[C@@H](CC3)OC1)C3C2=O	1	Drug Scaffolds	0.40741	0.80497	4	0.37472
C1c(cccc2)c2C(c2ccccc2)=NN=C1	2	Drug Scaffolds	0.52941	0.69315	3	0.37468
C1N=CN=CN1	1	Drug Scaffolds	0.66667	0.53648	1	0.37464
O=C(C1CC1)OC(C1)C=CC1=O	1	Drug Scaffolds	0.66667	0.60182	2	0.3744
c(cc1)ccc1Oc1ccccc1	17	Drug Scaffolds	0.69231	0.34256	2	0.37427
O=C(c1c(NCc2ccccc2)nc(N2CCCC2)nc1)NCc1ncccn1	2	Drug Scaffolds	0.51724	0.75474	4	0.37421
C1OCOCO1	1	Drug Scaffolds	0.66667	0	1	0.37417
C(C1)C1[n]1nc(C2CCOCC2)c(Oc2cc(Nc3ccncc3)ncc2)c1	1	Drug Scaffolds	0.53571	0.79328	5	0.37401
C(CN1CCCCC1)C(c1ccccc1)c1ccccc1	2	Drug Scaffolds	0.52381	0.5406	3	0.37398
O=C([C@H](c1ccccc1)NC(c1cc(cc(cc2)NC(c(cccc3)c3-c3ccccc3)=O)c2[nH]1)=O)NCc1ccccc1	1	Drug Scaffolds	0.52273	0.8512	6	0.37387
O=C1Oc(cccc2)c2C=C1Cc1ccccc1	4	Drug Scaffolds	0.61111	0.72413	3	0.37384
C(Cc1ccccc1)COc1cccc2ccccc12	1	Drug Scaffolds	0.65	0.58491	3	0.37382
O=C([C@H](CCC1=NC=C2)N1C2=O)Nc1ccc(C[C@H]2N[C@@H](Cc3ccccc3)CC2)cc1	1	Drug Scaffolds	0.625	0.80899	5	0.37381
O=C(NCc(cccc1)c1Sc1c[n]2c(-c3ccccc3)nnc2cc1)Nc1ccn[n]1-c1ccccc1	1	Drug Scaffolds	0.55263	0.8598	6	0.37373
O=C1Nc(cccc2)c2Oc2c1cccc2	1	Drug Scaffolds	0.5	0.73284	3	0.37369
O=C([C@@H]1/N=C/N2CCCCCC2)N2[C@H]1SCC2	1	Drug Scaffolds	0.58824	0.70595	4	0.37351
O=C(c(cccc1)c1N1)N(c2cc(-c3c(c(CCCC4)c4[nH]4)c4ccc3)ccc2)C1=O	1	Drug Scaffolds	0.48387	0.909	6	0.37334
C(c1ccccc1)O[C@H]1C[C@H](C2)[C@H]2C1	1	Drug Scaffolds	0.71429	0.53051	4	0.37333
O=C1N[C@H](CC[C@@H]2[C@@H]3CCC4[C@H]2CCC4)C3C=C1	1	Drug Scaffolds	0.55556	0.70492	4	0.3732
C(CN(CC1)CCC1Nc1nc(cccc2)c2[n]1Cc1ccccc1)c1ccccc1	1	Drug Scaffolds	0.58065	0.78821	5	0.37319
C(CN(CC1)CCC1N1CCCCC1)CN(c1c(CC2)cccc1)c1c2cccc1	2	Drug Scaffolds	0.53333	0.70898	5	0.37291
O=C1c(ccc(N2C[C@H]3NCCC[C@H]3C2)c2)c2N(C2CC2)C=C1	1	Drug Scaffolds	0.47826	0.81387	5	0.3729
O=C1Oc(cccc2)c2C=C1CC1=Cc(cccc2)c2OC1=O	2	Drug Scaffolds	0.56522	0.72855	4	0.37278
O=C1N(C2CCCCC2)c2nc(-c3cnccc3)cnc2NC1	1	Drug Scaffolds	0.52174	0.83271	4	0.37278
O=S1(NC(CSCc2ccccc2)=Nc2c1cccc2)=O	1	Drug Scaffolds	0.61905	0.74577	3	0.37275
O=C(c1cccc2ccccc12)N(CC1)Cc2c1[nH]c1c2cccc1	1	Drug Scaffolds	0.52	0.83102	5	0.37273
O=C1N(C2CCN(CCCC(c3ccccc3)c3ccccc3)CC2)c(cccc2)c2N1	1	Drug Scaffolds	0.53125	0.75107	5	0.37262
O=C(C1CC1)N(C[C@@H](C1)S(c(cc2)ccc2-c2c[nH]nc2)(=O)=O)[C@@H]1C(NC1CC1)=O	1	Drug Scaffolds	0.5	0.83847	5	0.37222
O=C(c1n[nH]c2c1cccc2)N[C@H]1C(CC2)CCN2C1	1	Drug Scaffolds	0.55	0.7679	5	0.37169
C(C=CC1)N1c1ccccc1	1	Drug Scaffolds	0.63636	0.49074	2	0.37165
O=C(CC1)C(CC2)[C@@H]1[C@H]1[C@H]2C(CCCC2)C2=CC1	1	Drug Scaffolds	0.55556	0.6766	4	0.37136
O=C(c1ccccc1)N(CC1)C[C@H]1Oc1nc(N(C2)CC2C2CC2)cc(Nc2n[nH]cc2)n1	1	Drug Scaffolds	0.51515	0.79105	6	0.37124
C(c(cc1)ccc1Oc1ccccc1)N(CCC1)[C@@H]1c1ccccc1	1	Drug Scaffolds	0.64	0.63466	4	0.37123
O=C(CC1)C=C(CC2)[C@@H]1[C@H]1[C@H]2[C@@H](CCC2)C2CC1	6	Drug Scaffolds	0.55556	0.655	4	0.37113
C1N=C(c2ccccc2)c(cccc2)c2N=C1	1	Drug Scaffolds	0.52941	0.70492	3	0.37113
O=C(C=CN1c2ccccc2)c(cc2)c1nc2N1CCCC1	1	Drug Scaffolds	0.5	0.81905	4	0.37105
O=C1NN=C(CN(C=CC=C2Oc3ccccc3)C2=O)N1	1	Drug Scaffolds	0.61905	0.73783	3	0.37101
O=S(c1ccccc1)(N[C@H](CC1)Cc2c1[nH]c1c2cccc1)=O	1	Drug Scaffolds	0.56522	0.82134	4	0.37098
O=C(CCCCOC(C[C@H](C1)O[C@@H]2OCCCC2)=O)CCC[C@@H]1O[C@@H]1OCCCC1	5	Drug Scaffolds	0.43333	0.65788	2	0.37096
O=C(CCCNC(c(cc1)ccc1NCc1nc(C(N=CN2)=O)c2nc1)=O)NCC(NCC(NCC(NCC(NCCSSCCOC(NNC(C(CC1C=CCN2[C@@H]1[C@]13CC2)[C@@H]1Nc1c3cc([C@@H](C[C@H](CCC2)CN2CC2)c3c2c(cccc2)c2[nH]3)cc1)=O)=O)=O)=O)=O)=O	1	Drug Scaffolds	0.56842	1.0064	11	0.37089
O=C(c1cccc2c1OC(c1ccccc1)=CC2=O)OCCN1CCCCC1	1	Drug Scaffolds	0.57143	0.81719	4	0.37088
O=C1c(cc(cc2)Oc3ccccc3)c2OC=C1	1	Drug Scaffolds	0.61111	0.69969	3	0.37071
C1CC(c2cccnc2)=NCC1	1	Drug Scaffolds	0.66667	0.66172	2	0.37067
O=C(c1ncccc1)Nc1cccc(C(C2)N=CNS2(=O)=O)c1	1	Drug Scaffolds	0.56522	0.74025	3	0.37067
C(C1CNCCC1)C1c(cccc2)c2Sc2c1cccc2	1	Drug Scaffolds	0.47619	0.70997	4	0.37066
O=C1c(cccc2C3CCNCC3)c2OC(c2ccccc2)=C1	2	Drug Scaffolds	0.52174	0.80135	4	0.37037
O=C1OCCN1c1c[n](CCOc2c3cccc2)c-3n1	1	Drug Scaffolds	0.5	0.83059	4	0.37032
O=C(NCc1ccccc1)N(CC[C@@H](C1)N(CC2)C[C@H](CC3)N2C3=O)[C@H]1c1ccccc1	1	Drug Scaffolds	0.53125	0.78295	5	0.37031
O=C1N=C(c2ccccc2)c(cccc2)c2N1Cc1ccccc1	1	Drug Scaffolds	0.54167	0.81145	4	0.3702
O=C(c1c2cccc1)N(CCCCNC[C@@H](CC1)Oc3c1cccc3)S2(=O)=O	1	Drug Scaffolds	0.60714	0.82973	4	0.37011
O=C(CCC(OCCC[NH+](CC1)C(Cc2ccccc2)c2c1cccc2)=O)OCCC[NH+](CC1)C(Cc2ccccc2)c2c1cccc2	1	Drug Scaffolds	0.54167	0.72768	6	0.37001
O=C(c1c[o]nc1-c1ccccc1)N[C@@H]([C@H]1SCCN11)C1=O	4	Drug Scaffolds	0.54545	0.8153	5	0.36998
C(Cc1ccc2ncncc2c1)c1ccccc1	1	Drug Scaffolds	0.66667	0.61292	3	0.36994
O=C(CC1)C=C(CC2)C1C(CC1)[C@@H]2[C@H]2C1C1OCO[C@@H]1C2	1	Drug Scaffolds	0.57143	0.7569	5	0.36976
C(C1CC1)[n]1c2ncncc2nc1	2	Drug Scaffolds	0.61538	0.68393	3	0.36957
C(c1ccccc1)[n]1nnc2c1ncnc2-c1ccc[o]1	1	Drug Scaffolds	0.57143	0.84284	4	0.36949
O=C1c(ccc(N2CCCCCC2)c2)c2N(C2CC2)C=C1	1	Drug Scaffolds	0.47619	0.76921	4	0.36946
O=C(c1ccccc1)Nc1c(CCC2NCCCC2)cccc1	1	Drug Scaffolds	0.6087	0.68511	3	0.36943
O=C(c1ccccc1)OC1CCCCC1	1	Drug Scaffolds	0.66667	0.52337	2	0.36943
O=C(N1CC(CCN2CCOCC2)C1)O[C@H](CC1)C[C@H](C2OC2)[C@]11OC1	1	Drug Scaffolds	0.61538	0.77245	5	0.36942
O=C(C(CCS(c1ccccc1)=O)C1=O)N(c2ccccc2)N1c1ccccc1	1	Drug Scaffolds	0.48276	0.76182	4	0.36941
O=C([C@@H](c1ccccc1)NC(c1cnccc1)=O)N[C@@H]([C@H]1SCC(CSc2nnn[nH]2)=CN11)C1=O	1	Drug Scaffolds	0.54286	0.86425	5	0.36932
O=C(CC1)C(CC2)[C@@H]1[C@H](CC1)[C@H]2c2c1cccc2	1	Drug Scaffolds	0.55556	0.70798	4	0.36929
C(C1CC1)c([nH]nc1)c1-c1ccnc(NC2CCCCC2)n1	1	Drug Scaffolds	0.59091	0.77052	4	0.36929
C(CC1)CCN1c1cc2ccccc2cc1	1	Drug Scaffolds	0.625	0.55597	3	0.36926
O=C(C[n]1cncc1)NCc1ccccc1	1	Drug Scaffolds	0.6875	0.53731	2	0.36924
O=C(CN1Cc2cc(CN3CCCC3)ccc2)Nc2c1ncnc2	1	Drug Scaffolds	0.54167	0.75761	4	0.36913
C([C@H](c1c2cccc1)c1ccccc1)[C@H]2N1CCNCC1	1	Drug Scaffolds	0.52381	0.75619	4	0.36913
C(CNCCc1ccccc1)COCc(cccc1)c1-c1ccccc1	1	Drug Scaffolds	0.69231	0.63799	3	0.36898
O=C(C1CC1)OC(CC1)C(CC2)[C@@H]1[C@H](CC1)C2C(C=C2)C1=CC2=O	1	Drug Scaffolds	0.58333	0.73618	5	0.36897
O=C(CC1CCNCC1)N(CC1)CCC1[C@H]1c2ncccc2CCc2c1cccc2	1	Drug Scaffolds	0.5	0.8153	5	0.36895
C(CNC1)[C@@H]1/C=C/c1cncnc1	1	Drug Scaffolds	0.69231	0.45984	2	0.36893
C(CNCC1)C1[n]1ncc(Nc(nc2)nc3c2[s]cc3-c2ccccc2)c1	1	Drug Scaffolds	0.59259	0.82405	5	0.36888
O=C([C@H](Cc1ccccc1)NC(c1ccccc1)=O)Nc1ccccc1	1	Drug Scaffolds	0.5	0.69426	3	0.3688
C(CC1CC2)C2C[C@H]1Nc1ccnc(-c2c[nH]c3c2cccn3)n1	1	Drug Scaffolds	0.54167	0.808	6	0.36872
O=C(NC1CCCCC1)Nc1ccccc1	1	Drug Scaffolds	0.6875	0.51585	2	0.36869
O=C(c1ncnc2c1cc[nH]2)c(nccc1)c1NS(c1ccccc1)(=O)=O	1	Drug Scaffolds	0.48148	0.86823	4	0.36864
O=C(NC1CCCCC1)Oc1cc(-c2ccccc2)ccc1	1	Drug Scaffolds	0.63636	0.63634	3	0.36861
O=C1NC2=N[C@H](CCC3)[C@H]3N2c2n[n](Cc(cc3)ccc3-c3ncccc3)c(Nc3ccccc3)c12	1	Drug Scaffolds	0.44444	0.96293	7	0.36856
O=C1N(C=CC=C2CNc3ccccc3)C2=NC(N2CCOCC2)=C1	1	Drug Scaffolds	0.56	0.83271	4	0.36853
C([C@H]1c2ccccc2)[C@H]1NC1CCCCC1	1	Drug Scaffolds	0.6875	0.57758	3	0.36846
O=C(c1ccccc1)NN(C1)C[C@@H]2[C@H]1[C@H]1C[C@@H]2CC1	1	Drug Scaffolds	0.57895	0.68153	5	0.36842
O=C(COc1ccccc1)N[C@@H]([C@H]1SCCN11)C1=O	3	Drug Scaffolds	0.63158	0.73369	4	0.36835
C(CN1CCNCC1)C=C1c(cccc2)c2Sc2c1cccc2	7	Drug Scaffolds	0.52174	0.73783	4	0.36834
O=C1N(c2ccccc2)[Se]c2c1cccc2	1	Drug Scaffolds	0.5625	0.73199	3	0.36824
C(CC1CC2)C[C@H]1[C@H](CC1)[C@H]2c2c1cccc2	11	Drug Scaffolds	0.52941	0.655	4	0.3682
O=C(c1n[nH]c2c1COc1c-2cccc1)N(Cc1ccccc1)Cc1ccccc1	1	Drug Scaffolds	0.46667	0.8534	5	0.36799
O=C1N2C=C(CSc3nnn[nH]3)CO[C@@H]2C1	1	Drug Scaffolds	0.625	0.71194	3	0.36796
O=C(C1(CCC1)NC(c(cc1)cc2c1c(C1CCCC1)c(-c1ncccc1)[nH]2)=O)Nc1ccccc1	1	Drug Scaffolds	0.5	0.89747	6	0.3679
c(cc1)ccc1Oc1nc2ccccc2nc1	1	Drug Scaffolds	0.64706	0.64751	3	0.36789
O=C(NCCCCNC(NCCOCCOCCNS(c1cc([C@H](CNC2)c3c2cccc3)ccc1)(=O)=O)=O)NCCOCCOCCNS(c1cc([C@H](CNC2)c3c2cccc3)ccc1)(=O)=O	1	Drug Scaffolds	0.67647	0.76723	6	0.36783
O=C(C1CC1)N(CC1)CCN1C(c1cccc(CC(c2c3cccc2)=NNC3=O)c1)=O	1	Drug Scaffolds	0.54839	0.79764	5	0.36782
C(CN(CC1)C2)C1C2Oc(cc1)cnc1-c1ccccc1	1	Drug Scaffolds	0.61905	0.71292	5	0.36781
O=C(CCc1ccncc1)N1CCCC1	1	Drug Scaffolds	0.66667	0.49057	2	0.36776
O=C(NCCCOc(cc1)cc(C=C2)c1NC2=O)N(C1CC1)C1CCCCC1	1	Drug Scaffolds	0.64286	0.74654	4	0.3677
C1NCC1Nc1ccc([C@H]2NCCc3c2[nH]c2c3cccc2)cc1	1	Drug Scaffolds	0.58333	0.83847	5	0.36761
O=C(c(cc1)cc2c1[nH]cn2)N(CCC1)[C@@H](C2)[C@H]1c1c2cccc1	1	Drug Scaffolds	0.5	0.82405	5	0.3676
C(C1)CNC1(CC1)CN1c1cccnc1	1	Drug Scaffolds	0.6	0.69426	3	0.36758
C(Cc1ccc(COc2c(CCNCc3ccccc3)cccc2)cc1)c1ccccc1	1	Drug Scaffolds	0.6875	0.65353	4	0.36756
O=C(CC1)C=C2C1=C1C=CC(CCC3)[C@@H]3[C@@H]1CC2	1	Drug Scaffolds	0.55556	0.78235	4	0.36751
N=C(CCC1[C@@H](CC2)[C@@H](C3)[C@H](CC4)C2C4=O)C[C@@H]1C3=O	1	Drug Scaffolds	0.55	0.64597	4	0.3674
O=S(c1ccccc1)(/N=C/NCCSCc1c[s]cn1)=O	1	Drug Scaffolds	0.71429	0.56718	2	0.36739
C(c1nc(-c2c[n]3ncnc3cc2)c(-c2ncccc2)[nH]1)Nc1ccccc1	1	Drug Scaffolds	0.5	0.88979	5	0.36734
N=C(C(N[C@@H]([C@H]1SCC=CN11)C1=O)=O)c1c[s]cn1	6	Drug Scaffolds	0.57895	0.79048	3	0.36732
c(cc1)ccc1-c1nc2cncnc2nc1-c1ccccc1	1	Drug Scaffolds	0.45455	0.75832	4	0.36731
O=C(c1c(C2CC2)[o]nc1)c1ccccc1	1	Drug Scaffolds	0.5625	0.70389	3	0.36728
C(CNC[C@@H]1Oc(cccc2)c2OC1)COc(cc1)cc2c1OCO2	1	Drug Scaffolds	0.68	0.66755	4	0.36727
C(COc1ccc(C[n](c(-c2ccccc2)c2)c3c2cccc3)cc1)N1CCCCC1	1	Drug Scaffolds	0.58065	0.76987	5	0.36726
C(c1ccc(-c2ccccc2)[s]1)c1cc(C2OCCCC2)ccc1	1	Drug Scaffolds	0.625	0.73284	4	0.36725
O=C(c1ncccc1)Nc1cccc(C2N=CSC=C2)c1	1	Drug Scaffolds	0.61905	0.71292	3	0.36724
C(C1)CO[C@H]1[n]1c2nc(-[n]3nccc3)ncc2nc1	1	Drug Scaffolds	0.52632	0.82494	4	0.36723
C(c1nnc(cc2)[n]1nc2-c1c[n](C2CC2)nc1)c1cc2c[nH]nc2cc1	1	Drug Scaffolds	0.55556	0.8762	6	0.36716
O=C(CNC(CNC([C@H](C1CCCCC1)NC(CNC(CNC([C@H]1NCCC1)=O)=O)=O)=O)=O)NCC(N[C@H]1C[C@H](O[C@@H](CCCc2c3)c2cc(C(c2c4cccc2)=O)c3C4=O)OCC1)=O	1	Drug Scaffolds	0.55385	0.86084	7	0.36714
O=C(c1c2OCCc2ccc1)NCC1CCNCC1	1	Drug Scaffolds	0.57895	0.7268	3	0.36713
O=C(C(c1ccccc1)=C1C=C2)N=CN1N=C2Sc1ccccc1	1	Drug Scaffolds	0.58333	0.84087	4	0.36709
C(CC1)CCC1[n]1c(Nc2ccccc2)nc2c1cccc2	1	Drug Scaffolds	0.5	0.77245	4	0.36705
O=C(c1ccccc1)NN(CC1)c2c1cccc2	1	Drug Scaffolds	0.61111	0.70595	3	0.36698
C(CN1c(cccc2)c2Sc2c1cccc2)C1NCCCC1	1	Drug Scaffolds	0.5	0.70798	4	0.36695
C(c1ccccc1)NCc1cccc2ccccc12	1	Drug Scaffolds	0.63158	0.55303	3	0.36694
O=C(C=CN1[C@H]2O[C@@H](CO[P@@H](Oc3ccccc3)=O)CC2)NC1=O	1	Drug Scaffolds	0.66667	0.75903	3	0.36689
c(cc1)ccc1Oc1ncnc2ccccc12	1	Drug Scaffolds	0.58824	0.68629	3	0.36686
O=C(c1ccccc1)OCCN1CCOCC1	1	Drug Scaffolds	0.70588	0.4995	2	0.36685
O=C(CC(N1C2CCCCC2)=O)N(C2CCCCC2)C1=O	1	Drug Scaffolds	0.52381	0.67908	3	0.36681
O=C(Cc1cc(Oc2ccccc2)ccc1)Nc1ccccc1	1	Drug Scaffolds	0.65217	0.62054	3	0.36671
O=C(c(cc1)cnc1OCc1c[o]nc1-c1ccccc1)N(CC1)CCS1(=O)=O	1	Drug Scaffolds	0.62069	0.77749	4	0.36652
O=C1OC(COC(CC(C[C@H](CCCC(C2)=O)O[C@@H]3OCCCC3)=O)=O)[C@@H]2[C@@H]1/C=N/OCc1nnc(-c2ncccc2)[s]1	1	Drug Scaffolds	0.55814	0.84935	4	0.36651
O=C([C@@H](CC1)N(C2CCN(Cc3ccccc3)CC2)C1=O)Nc1ncccc1	1	Drug Scaffolds	0.60714	0.75973	4	0.3665
C(c1cc(cccc2)c2[s]1)c1cc(C2OCCCC2)ccc1	1	Drug Scaffolds	0.59091	0.74025	4	0.36642
C(CN1CCOCC1)COc1ccccc1	1	Drug Scaffolds	0.75	0.44793	2	0.36635
C(COCC1)C1c1cccc(Sc(cc2)ccc2-c2ccn[nH]2)c1	1	Drug Scaffolds	0.625	0.67534	4	0.3663
C(C1CCNCC1)Nc1nc2ccn[n]2c(NCc2ccccc2)c1	1	Drug Scaffolds	0.6	0.79217	4	0.36615
O=C(N(CC1)CCN1C1CCCCCC1)O[C@H](CCCCC1)/C=C/C[C@@H](/C=C/C=C/CC[C@H]2OC2)OC1=O	1	Drug Scaffolds	0.60526	0.7177	3	0.36613
O=C(c1ccccc1)Nc(cc1)ccc1C(N(CCCC1)c2c1cccc2)=O	2	Drug Scaffolds	0.57143	0.74499	4	0.36581
C(C(C1)[n](cc2-c3c(cn[nH]4)c4ccc3)nc2-c(cc2)cc3c2[nH]nc3)C11CNC1	1	Drug Scaffolds	0.43333	0.88637	7	0.36574
O=C(Cc1ccccc1)N(CC1)Cc2c1cccc2	1	Drug Scaffolds	0.63158	0.6621	3	0.36573
C1c(cccc2)c2OC[C@@H]1c1ccccc1	1	Drug Scaffolds	0.625	0.65788	3	0.3657
O=C(C(Nc1ccncc1)=O)c1c[n](Cc2ccccc2)c2c1cccn2	1	Drug Scaffolds	0.55556	0.85231	4	0.3657
C(CO[C@H]1OC2CCCCC2)[C@H]1O[C@@H]1OCCCC1	2	Drug Scaffolds	0.63158	0.64751	3	0.36567
O=C(CS1)NC1=O	1	Drug Scaffolds	0.71429	0.76753	1	0.36567
C(CC1)CC1Oc1cc(C2CCCCC2)ccc1	1	Drug Scaffolds	0.61111	0.61095	3	0.36563
C(CN(C1)[C@H]2Cc3c1cccc3)c1c2cccc1	1	Drug Scaffolds	0.55556	0.7268	4	0.36551
C(COC1)c2c1[s]cc2	1	Drug Scaffolds	0.55556	0.73778	2	0.36545
O=C(C1)N(CCCNCC(C2)c3c2cccc3)CCc2c1cccc2	1	Drug Scaffolds	0.64	0.67407	4	0.36534
C(C1OCCNC1)Oc1ccccc1	1	Drug Scaffolds	0.71429	0.4995	2	0.36519
O=C(CC1=CCC=CC1)N[C@H]([C@@H]1SCC=CN11)C1=O	2	Drug Scaffolds	0.63158	0.76523	3	0.36517
O=C(C1(CC1)c(cc1)cc2c1OCO2)N[C@H](C1)c(cccc2)c2O[C@H]1c1ccccc1	1	Drug Scaffolds	0.48387	0.84323	6	0.3651
C(c1ccccc1)[n]1c(cccc2)c2nc1	1	Drug Scaffolds	0.625	0.66348	3	0.36505
C(CC1CC2)C[C@H]1[C@H]1[C@H]2C(CCCC2)[C@@H]2CC1	10	Drug Scaffolds	0.52941	0.45401	4	0.36501
C(c1c[n](-c2ncccc2)nc1)N(CC1)CCC11OCCc2c1[s]cc2	1	Drug Scaffolds	0.57692	0.83396	5	0.36496
O=C(C[C@H](CCCCOC(C[C@H]12)=O)O[C@@H]3OCCCC3)C1=C[C@@H]1[C@H]2C=C[C@H](C2)[C@H]1C[C@@H]2O[C@@H]1OCCCC1	1	Drug Scaffolds	0.5	0.82801	5	0.36494
O=C(C1(CC1)C(Nc(cc1)ccc1Oc1ccnc2cc(OCCCN3CCOCC3)ccc12)=O)Nc1ccccc1	1	Drug Scaffolds	0.64286	0.75903	6	0.36489
C(c(cc1)ccc1O[C@H]1COCC1)c1cccc([C@H]2OCCCC2)c1	1	Drug Scaffolds	0.64	0.68153	4	0.36477
O=C1N=CNc2c1[nH]cc2C1NCCC1	1	Drug Scaffolds	0.53333	0.81194	3	0.36469
O=C1N(Cc2nc(cccc3)c3[s]2)N=Cc2c1nccn2	1	Drug Scaffolds	0.57143	0.82449	4	0.36465
O=C1OC[C@H](C2)[C@@H]1[C@H](c1ccccc1)c1c2cc2OCOc2c1	1	Drug Scaffolds	0.43478	0.82582	5	0.36464
O=C(C1)Nc(cccc2)c2-c2c1cccc2	1	Drug Scaffolds	0.5	0.74806	3	0.36422
O=S(c1ccccc1)(NCc1cc(CN2CCCC2)cc(CN2CCCC2)c1)=O	1	Drug Scaffolds	0.48276	0.62953	4	0.36415
C(c1cnccc1)Nc1cc(N2CCCCC2)nc2ccn[n]12	1	Drug Scaffolds	0.56522	0.80899	4	0.36407
O=C(C=CN1[C@@H]2O[C@H](COP(OP(OP(OP(OC[C@H](CC3)O[C@H]3N(C=CC(N3)=O)C3=O)=O)=O)=O)=O)CC2)NC1=O	1	Drug Scaffolds	0.65854	0.75973	4	0.36397
C(C1)C1c1cccc2c1CCO2	2	Drug Scaffolds	0.5	0.67908	3	0.36393
O=C(C1CC1)Nc(cccc1CN2Cc3ccccc3)c1C2=O	1	Drug Scaffolds	0.56522	0.77562	4	0.36393
O=C1N(Cc(cc2)ccc2-c(cccc2)c2-c2nnn[nH]2)C=NC11CCCC1	1	Drug Scaffolds	0.53571	0.80343	5	0.36392
O=C(C1NCCCC1)Nc1ccccc1	1	Drug Scaffolds	0.66667	0.58491	2	0.3639
O=C(C(c1c[nH]c2c1cc1OCOc1c2)=C1c2c[o]c3c2cccc3)NC1=O	1	Drug Scaffolds	0.46429	0.92833	6	0.36388
C(CNCCc1ccccc1)c1ccccc1	7	Drug Scaffolds	0.76471	0.35499	2	0.36378
O=C(c(cccc1)c1Nc1ccnc2ccccc12)OCCN(CC1)CCN1c1ccccc1	1	Drug Scaffolds	0.58824	0.77052	5	0.36376
O=C(Cc1c[s]cn1)N[C@H]([C@@H]1SCC(CSc2nnn[nH]2)=C(C(OCOC(OC2CCCCC2)=O)=O)N11)C1=O	1	Drug Scaffolds	0.51282	0.91361	5	0.36364
O=S1(NC(Cc2ccccc2)Nc2c1cccc2)=O	1	Drug Scaffolds	0.57895	0.7473	3	0.36351
O=C1OC[C@@H](c2c3ccc4c2OCO4)N(C[C@H](C2)N[C@@H]4c5c2cccc5)[C@H]4[C@@H]3SC[C@]11NCCc2c1[nH]c1c2cccc1	1	Drug Scaffolds	0.34884	1.0388	9	0.36349
O=C(CCCc1ccccc1)N(C1)C[C@@H]2[C@H]1CCCC2	2	Drug Scaffolds	0.65	0.62054	3	0.36344
O=C1N(c2ccccc2)NC=C1CN1CC(c2ccccc2)OCC1	1	Drug Scaffolds	0.6	0.75832	4	0.36332
O=C1NC(CCCC2)N2C11CCN(CCCN(c2c(CC3)cccc2)c2c3cccc2)CC1	1	Drug Scaffolds	0.48485	0.81766	6	0.36331
O=C(c1c[s]c2c1CCCC2)c1ccccc1	1	Drug Scaffolds	0.58824	0.76523	3	0.3632
C(c1ccc[s]1)Nc(cccc1)c1-c1nnn[nH]1	1	Drug Scaffolds	0.55556	0.70492	3	0.36306
O=C(CC1)C[C@H](CC2)C1[C@@H]1[C@@H]2[C@H](CCC2)C2CC1	1	Drug Scaffolds	0.55556	0.49511	4	0.36301
C(CC1CC2)C[C@@H]1[C@@H](CC1)C2C2[C@H]1C(CCCC1)[C@H]1CC2	2	Drug Scaffolds	0.52381	0.45984	5	0.36298
N=C(C(N[C@@H]([C@H]1SCC=CN11)C1=O)=O)c1ccc[o]1	2	Drug Scaffolds	0.57895	0.79048	3	0.36293
O=C(Cc1ccccc1)O[C@H](C1)C[C@@H]2[NH+](CC3CC3)[C@H]1[C@H]1O[C@@H]21	1	Drug Scaffolds	0.6087	0.80135	7	0.36292
O=C(C=COc1ccc2)c1c2OCCCOc1cccc(OC=C2)c1C2=O	1	Drug Scaffolds	0.55556	0.70181	4	0.36291
O=C([C@H](C1)NC[C@H]1N(CC1)CCN1c1ccn[n]1-c1ccccc1)N1CSCC1	1	Drug Scaffolds	0.58621	0.79493	5	0.3629
C(c1ccc[s]1)Oc1cccc2ccccc12	1	Drug Scaffolds	0.58824	0.59634	3	0.36288
C=C(CC1)CCC1=C/C=C1/[C@H](CCC2)C2CCC/1	2	Drug Scaffolds	0.61111	0.63466	3	0.36287
C(c1ccccc1)[n]1c(cc(cc2)N3CCOCC3)c2nc1	1	Drug Scaffolds	0.59091	0.71956	4	0.36277
c(cc1-c(cc2)ccc2-[n]2cncc2)c[n]1-c1ccccc1	1	Drug Scaffolds	0.59091	0.70798	4	0.36276
C(\c1ccccc1)=C(/C=C1)\c2c1cccc2	2	Drug Scaffolds	0.625	0.64904	3	0.36267
O=S(CC1CCOCC1)(c(cc1)ccc1Oc1ccccc1)=O	1	Drug Scaffolds	0.65217	0.62054	3	0.36262
B1OCc2c1ccc(Oc1ccccc1)c2	1	Drug Scaffolds	0.625	0.63799	3	0.36261
C(c1ccccc1)Nc1ncccn1	2	Drug Scaffolds	0.71429	0.44158	2	0.36253
C(CC1CCC2)CC1/C\2=C/C=C1CCCCC1	1	Drug Scaffolds	0.58824	0.60487	3	0.36253
O=C1C=C([C@@H](CCCC2)C2CC2)C2C2[C@@H]1C(CCCC1)[C@@H]1CC2	1	Drug Scaffolds	0.52174	0.71194	5	0.36253
O=C(CC(CCC1)[C@H]1[C@@H]1CC2)C1C(C=C1)C2=CC1=O	1	Drug Scaffolds	0.52632	0.72413	4	0.3624
O=C(c1c2cccc1)NS2(=O)=O	1	Drug Scaffolds	0.5	0.75181	2	0.36226
O=C(C(C(Oc1cc(CCC2)c2cc1)=O)c1ccccc1)N[C@H]([C@@H]1SCCN11)C1=O	1	Drug Scaffolds	0.46667	0.83016	6	0.36224
C(c(cc1)ccc1-c(cccc1)c1-c1nnn[nH]1)[n]1cncc1	2	Drug Scaffolds	0.56522	0.73369	4	0.36224
O=C1OCC(Cc(cc2)cc3c2[nH]cc3)N1	1	Drug Scaffolds	0.625	0.68153	3	0.36222
O=C([C@@H]1SCCN1S(c(cc1)ccc1-c1ccccc1)(=O)=O)NCc1ccccc1	1	Drug Scaffolds	0.6	0.78472	4	0.36209
O=C(N(CC1)[C@@H](c2ccccc2)c2c1cccc2)O[C@@H]1C(CC2)CCN2C1	1	Drug Scaffolds	0.44444	0.79656	6	0.36205
O=C(C=Cc1c2cccc1)N2OCC1CC1	1	Drug Scaffolds	0.5625	0.73284	3	0.36202
O=C1NC(c2cc(S(N3CCNCC3)(=O)=O)cnc2)=Nc2c[nH]nc12	1	Drug Scaffolds	0.52	0.84972	4	0.36199
C(C1)CC=C[C@@H]1N[C@@H](CC1)CO[C@@H]1O[C@@H](CC1)CO[C@@H]1O[C@@H]1COCCC1	1	Drug Scaffolds	0.7037	0.67908	4	0.36198
O=C(c([s]cc1)c1NCc1ccnc2ccccc12)Nc1ccccc1	1	Drug Scaffolds	0.57692	0.76921	4	0.36168
C(CC1)CCC1Nc(cc1)n[n]2c1ncc2-c1ccccc1	1	Drug Scaffolds	0.59091	0.79548	4	0.3616
O=C(CCCC1)/C\1=C/c1ccccc1	1	Drug Scaffolds	0.64286	0.57505	2	0.36154
O=C(c1ccccc1)OCc1ccccc1	1	Drug Scaffolds	0.6875	0.46544	2	0.36151
C(c1cnccc1)N(C(C1)C2)C1CN2c(cc1)ncc1-c1ccc[n]2nccc12	1	Drug Scaffolds	0.58621	0.85449	7	0.36145
C(C[n]1c(cccc2)c2c2c1CCNC2)c1cccnc1	1	Drug Scaffolds	0.52381	0.82449	4	0.36145
O=C([C@@H](CC1)C(CC2)C1C(CCC1N3)C2C1C=CC3=O)NCc1nc(nccc2)c2[nH]1	1	Drug Scaffolds	0.58065	0.808	6	0.36143
O=C(c1ccccc1)NCc1ccccc1	2	Drug Scaffolds	0.6875	0.46544	2	0.36136
O=C(C1=CC(c2ccn[nH]2)=CN(c2ccccc2)C1=O)NCc1ncccc1	1	Drug Scaffolds	0.5	0.84972	4	0.36136
O=C(c1c2cccc1)N(Cc1cc(OC3CCCC3)ccc1)C2=O	1	Drug Scaffolds	0.54167	0.70181	4	0.36132
C=C(CCC1)CN1c(cc1)cc(N(C2CC2)C=C2)c1C2=O	1	Drug Scaffolds	0.47619	0.77811	4	0.36132
O=C(c1ccccc1)NN(C([C@H]1[C@H]([C@@H]2[C@H]3C2)C=C[C@H]3[C@H]11)=O)C1=O	1	Drug Scaffolds	0.52174	0.82405	8	0.36122
c1ccc2c(-c3cccnc3)cccc2c1	1	Drug Scaffolds	0.5625	0.62953	3	0.36113
C(CCNc1cccc2ncccc12)Cc1c2OCCc2ccc1	1	Drug Scaffolds	0.58333	0.74806	4	0.36104
O=C(CNC1=O)N1c1ccccc1	1	Drug Scaffolds	0.53846	0.61678	2	0.36101
O=S(c1ncccc1)(Nc1nc(-c2cc(-c3nnn[nH]3)ncc2)ncc1Oc1ccccc1)=O	2	Drug Scaffolds	0.44118	0.84556	5	0.361
O=C(C1CCCCC1)NC(CCN([C@H](CC1)C2)[C@@H]1C[C@H]2[n]1cnnc1)c1ccccc1	1	Drug Scaffolds	0.51613	0.73701	6	0.36081
C(CN(CC1)CCC1N1CCCCC1)C(c1ccccc1)c1ccccc1	1	Drug Scaffolds	0.55556	0.59188	4	0.36072
O=C1OCC([C@H](CC2)C(CC3)C2[C@@H](CC2)[C@@H]3C(CC3)[C@@H]2C[C@@H]3O[C@H](CC2)OC[C@@H]2O[C@H](CC2)OC[C@@H]2O[C@H]2OCCCC2)=C1	4	Drug Scaffolds	0.63636	0.7268	8	0.36063
O=C(/C(\c1ccn[o]1)=C\Nc1ccccc1)Nc1ccccc1	1	Drug Scaffolds	0.56522	0.70898	3	0.36063
C(c1ccccc1)Nc(cc1)n[n]2c1ncc2-c1ccccc1	1	Drug Scaffolds	0.6087	0.78413	4	0.36055
C(C1)C1Nc1ncnc2c1nc[n]2[C@H]1C=CCC1	2	Drug Scaffolds	0.55556	0.77749	4	0.36051
c(cc1)ccc1Oc1cncnc1	1	Drug Scaffolds	0.69231	0.44158	2	0.36047
O=C(CC1)NC1=O	2	Drug Scaffolds	0.71429	0.59725	1	0.36041
c(cc1)ccc1Nc1ccnc2ccccc12	5	Drug Scaffolds	0.58824	0.655	3	0.36038
C1c2cccc(-c3c(C4)cccc3)c2[C@@H]4NC1	1	Drug Scaffolds	0.47059	0.79161	4	0.36026
O=C(CC1)C(CC2)[C@@H]1[C@H]1[C@H]2C(CCCC2)C2=CC1	2	Drug Scaffolds	0.55556	0.65788	4	0.36025
O=C([C@H]1NCCCC1)Nc1ccccc1	2	Drug Scaffolds	0.66667	0.58491	2	0.36023
O=C(C=C1)N(C2CCCC2)c2c1cnc(NC1CCOCC1)c2	1	Drug Scaffolds	0.52174	0.80343	4	0.36022
c1c(Nc2nccc(Nc3ccccc3)c2)[nH]nc1	1	Drug Scaffolds	0.63158	0.6593	3	0.36018
C(C1)c(cccc2)c2Nc2c1cccc2	7	Drug Scaffolds	0.53333	0.60067	3	0.36016
C(c1ccccc1)[n](c(-c1n[o]cc1)c1)nc1-c1ncccn1	2	Drug Scaffolds	0.52174	0.80135	4	0.36015
O=C(CC1)C=C(CC2)C1[C@@H]1[C@@H]2[C@H](CCC2)C2CC1	25	Drug Scaffolds	0.55556	0.66755	4	0.36013
C(c1nc(CO[C@@H]2COCC2)ccc1)[n]1nnc2c1ncnc2-c1ccc[o]1	1	Drug Scaffolds	0.57143	0.87835	5	0.36011
O=C(c1ncc2[o]ccc2c1)N[C@@H]1C(CC2)CCN2C1	1	Drug Scaffolds	0.55	0.77436	5	0.3601
O=C(CC1)C=C2C1C1=CCC(CCC3)[C@@H]3[C@@H]1CC2	1	Drug Scaffolds	0.55556	0.74421	4	0.36005
O=C(C(Nc1ccncc1)=O)c1c[n](Cc2ccccc2)c2c1cccc2	1	Drug Scaffolds	0.55556	0.82134	4	0.36003
C(C1CCOCC1)OC[C@@H]1OCCCC1	1	Drug Scaffolds	0.73333	0.47603	2	0.36
O=C(C=CN1c2c3SCC1)c2ccc3N1CCNCC1	1	Drug Scaffolds	0.5	0.84087	4	0.35981
C([C@H](C[n]1ncnc1)c1ccccc1)c1nc(-c2ccccc2)c[s]1	3	Drug Scaffolds	0.52	0.74185	4	0.3598
C(CC1)CCC1Nc1cc(N2CCOCC2)nc(-[n]2nccc2)n1	1	Drug Scaffolds	0.5	0.73114	4	0.35974
C([C@H]1NCCC1)Oc1nc(N2CCNCC2)c(CCN(C2)c3cccc4ccccc34)c2n1	1	Drug Scaffolds	0.45455	0.8598	6	0.35965
O=C(c1ccccc1)NCC(N1Cc2ccccc2)=Nc([s]nc2)c2C1=O	1	Drug Scaffolds	0.51852	0.8236	4	0.35965
C(C1)CC=CC1c1ccccc1	1	Drug Scaffolds	0.66667	0.58275	2	0.35962
C(C[C@@H]12)C[C@H]1c(cccc1)c1O[C@H]2c1ccccc1	1	Drug Scaffolds	0.52632	0.77749	4	0.3596
O=C1NC=Nc2c1[nH]cc2Cc1cnccc1	1	Drug Scaffolds	0.58824	0.77872	3	0.35959
C(C1)C(CC2)CCC12c1nnc(-c2ccccc2)[nH]1	1	Drug Scaffolds	0.57895	0.6909	5	0.35954
O=C1N[C@H](COc2nccc3ccccc23)CC1	1	Drug Scaffolds	0.61111	0.68031	3	0.35948
O=C(CC(CCC1)[C@@H]1[C@@H]1CC2)[C@@H]1C(CC1)C2=CC1=O	1	Drug Scaffolds	0.52632	0.70492	4	0.35932
C(c1ccccc1)Nc1ccccc1	1	Drug Scaffolds	0.71429	0.44158	2	0.35931
O=C([C@H]1NCCC1)NC[C@H]1OCCCC1	4	Drug Scaffolds	0.66667	0.58251	2	0.35931
C(CC1)CCN1c1ncnc2c1nc(-c1ccccc1)[n]2-c1ccccc1	1	Drug Scaffolds	0.44444	0.85231	5	0.35925
O=C(COc1ncccc1)NC[C@@H](Cc1ccccc1)c1ccccc1	1	Drug Scaffolds	0.57692	0.64597	3	0.35919
O=C(CN(c(nc(-c1ccccc1)nc1)c1N1)C1=O)NCc1ccccc1	1	Drug Scaffolds	0.59259	0.81672	4	0.35918
O=C1c(ccc(N2CCCCC2)c2CCC3)c2N3C=C1	1	Drug Scaffolds	0.5	0.81243	4	0.35917
O=C1N(C[C@H](C[n]2ncnc2)c2ccccc2)C=Nc2c1cccc2	1	Drug Scaffolds	0.48	0.77499	4	0.35916
O=S(Cc1ncccc1)c1nc(cccc2)c2[nH]1	1	Drug Scaffolds	0.61111	0.72768	3	0.3591
O=C(CN(CC1)CCN1c(cc1)c[n]2c1ncc2Nc1nc(-c2ccccc2)c[s]1)N1CCC1	1	Drug Scaffolds	0.61765	0.84517	6	0.35903
N=C(c1cnccc1)NOCCCN1CCCCC1	1	Drug Scaffolds	0.73684	0.56718	2	0.35902
C(COc1ccccc1)[n]1c(-c2ccccc2)ccc1	1	Drug Scaffolds	0.65	0.64441	3	0.35886
O=C(c(cc1)cc2c1[nH]cc2)N1CCN(Cc2ccccc2)CC1	1	Drug Scaffolds	0.625	0.69862	4	0.3588
O=C(c1c[nH]nn1)N[C@H](CCN(C1)C2COC2)c(cc2)c1cc2-c1nc(Nc2c[nH]nc2)ncc1	1	Drug Scaffolds	0.48571	0.84708	6	0.35879
O=S(c1ccccc1)(Nc1cncc(-c(ccc2ncc3)cc2c3-c2cnncc2)c1)=O	1	Drug Scaffolds	0.53125	0.81483	5	0.35872
C(/C=C/c1ccccc1)N(CC1)CCN1C(c1ccccc1)c1ccccc1	3	Drug Scaffolds	0.57143	0.61487	4	0.35867
O=C1O[C@H](CC[C@@H](CC=C2)[C@@H]3C2=CCCC3)CCC1	2	Drug Scaffolds	0.57895	0.67279	3	0.35863
C1S[As](c2ccccc2)SC1	1	Drug Scaffolds	0.63636	0.49074	2	0.35859
O=C(c1ccnc2ccccc12)N[C@@H](CC1)C[C@@H](Cc2ccccc2)N1C(c1ccccc1)=O	1	Drug Scaffolds	0.47059	0.79438	5	0.35854
C1[C@H](O[C@H](CCCC2)[C@@H]2O[C@H]2OCCCC2)OC[C@H]1O[C@H]1OCCCC1	1	Drug Scaffolds	0.61538	0.64751	4	0.35844
O=C(C1CC1)OCN(C(C1=C2CCCC1)=O)C2=O	1	Drug Scaffolds	0.55556	0.71675	3	0.35842
O=C(Cc1ccccc1)NCc1ncccc1	1	Drug Scaffolds	0.70588	0.55597	2	0.3582
O=S(Cc1ncccc1)c1nc(cccc2)c2[n]1S(c1ccccc1)(=O)=O	1	Drug Scaffolds	0.48148	0.87338	4	0.35814
O=C(C(C1=O)=CNc2c1[s]cc2)N[C@@H]1C(CC2)CCN2C1	1	Drug Scaffolds	0.52381	0.82089	5	0.35813
C1NC(Sc2c[nH]c3c2cccc3)=NC1	1	Drug Scaffolds	0.6	0.70798	3	0.35813
O=C(c1c2[nH]ccc2ccc1)N1CCN(CCc2ccccc2)CC1	1	Drug Scaffolds	0.6	0.75255	4	0.35812
O=C(CCc1c[nH]c2c1cccc2)N1CC(Cc2ccccc2)CCC1	1	Drug Scaffolds	0.61538	0.7268	4	0.35796
O=C1N(CCCN(CC2)CCN2C(c2ccccc2)c2ccccc2)c(cccc2)c2N1	1	Drug Scaffolds	0.53125	0.73618	5	0.35792
C1c2cccc(-c3c(C4)cccc3)c2C4NC1	1	Drug Scaffolds	0.47059	0.79161	4	0.35786
O=C1c(cccc2[C@H]3CNCC3)c2OC(c2ccccc2)=C1	1	Drug Scaffolds	0.5	0.81625	4	0.35779
O=C1N(C2CCCCC2)c2ncncc2C=C1c1cnccc1	1	Drug Scaffolds	0.47826	0.8534	4	0.35758
O=C([C@H]1NC[C@H]2[C@@H]1C2)NCCC1CCC1	1	Drug Scaffolds	0.66667	0.626	4	0.3575
O=C(CC(CCC1)[C@@H]1[C@@H]1CC2)[C@@H]1C(CC1)C2=CC1=O	2	Drug Scaffolds	0.52632	0.72323	4	0.35749
O=C(c1ccccc1)NC[C@H]1NCCC1	5	Drug Scaffolds	0.66667	0.54381	2	0.35739
O=C(c1cccc2cc(Oc3ccnc4ccccc34)ccc12)Nc1ccccc1	1	Drug Scaffolds	0.56667	0.7569	5	0.35716
O=C(CN[C@H]1CNCC1)N1CCCC1	1	Drug Scaffolds	0.64286	0.50377	2	0.35715
O=C1C=C2Oc(cccc3)c3C(c3ccccc3)=C2C=C1	3	Drug Scaffolds	0.47619	0.83271	4	0.35711
C(C[C@H]1NCCCC1)C[n]1c(cccc2)c2nc1	1	Drug Scaffolds	0.66667	0.66888	3	0.35688
C(c1cnc[s]1)c1nnc(-c(cnc2c3cn[nH]2)c3NC2CCOCC2)[o]1	1	Drug Scaffolds	0.51852	0.86625	5	0.35681
O=C1c(cc(Cc2ccccc2)cc2)c2NC=C1	2	Drug Scaffolds	0.61111	0.69426	3	0.35667
O=C(C1(CC1)C(Nc(cc1)ccc1Oc1ccnc2ccccc12)=O)Nc1ccccc1	1	Drug Scaffolds	0.59375	0.73114	5	0.35651
O=C([C@H](C1)NC[C@@H]1Oc1nccc2ccccc12)NC1(CC1)C(NS(C1CC1)(=O)=O)=O	1	Drug Scaffolds	0.54839	0.81766	5	0.35646
C=C(C(c1ccccc1)=C)c1ccccc1	1	Drug Scaffolds	0.625	0.50377	2	0.35629
O=C(C(C(Oc1cc(CCC2)c2cc1)=O)c1ccccc1)N[C@@H]([C@H]1SCCN11)C1=O	1	Drug Scaffolds	0.46667	0.83271	6	0.35622
O=C(c1ccccc1)NN1CCCCC1	1	Drug Scaffolds	0.66667	0.52337	2	0.35617
C(CC1CC2)C[C@H]1[C@H](CC1)[C@H]2C(C2)C1=Cc1c2cn[o]1	1	Drug Scaffolds	0.5	0.7569	5	0.35615
O=C1N(C2CCN(CCC(c3ccccc3)c3ccccc3)CC2)c(cccc2)c2N1	1	Drug Scaffolds	0.51613	0.75181	5	0.35611
N=C(NCCCCCCNC(NC(Nc1ccccc1)=N)=N)NC(Nc1ccccc1)=N	1	Drug Scaffolds	0.75	0.52337	2	0.35608
O=C(CN(C(C(CC1)CCS1(=O)=O)=O)c1ccccc1)Nc(cc1)ccc1-c1n[o]cn1	1	Drug Scaffolds	0.53125	0.74499	4	0.35606
O=C(NCc1ccccc1)NCc(cccc1)c1-c1ccccc1	1	Drug Scaffolds	0.625	0.63126	3	0.35603
O=C1N(Cc2ccccc2)[C@@H]([C@H]2C[C@@H]3CC2)[C@@H]3C=C1C(Nc1c2cccc1)=NS2(=O)=O	1	Drug Scaffolds	0.45161	0.91668	7	0.356
C(c1ccc[s]1)Nc1ncccc1	1	Drug Scaffolds	0.69231	0.53731	2	0.35587
O=C(c1c2nc(Nc(cc3)ccc3N3CCNCC3)nc1)NN2c1nc(CCC2)c2cc1	1	Drug Scaffolds	0.5625	0.88922	6	0.35583
c([nH]nc1-c2ccccc2)c1-c1ncncc1	1	Drug Scaffolds	0.58824	0.74264	3	0.35581
O=C(c(cc1)ccc1-c1c(-c2nnn[nH]2)[nH]nc1)N([C@H]1CNCCC1)c1ncccc1	1	Drug Scaffolds	0.48387	0.85875	5	0.35567
C(c1ccc(CN2CCNCCCNCCNCCC2)cc1)N1CCNCCCNCCNCCC1	1	Drug Scaffolds	0.61111	0.52337	1	0.35562
O=C(c(cccc1)c1-c1ncccn1)N1C[C@H](COc2ncccc2)CCC1	1	Drug Scaffolds	0.57143	0.75903	4	0.35555
C(C1=CC2=CC=CC=CC2=C1)c1cccc([C@@H]2OCCCC2)c1	1	Drug Scaffolds	0.6087	0.75547	4	0.35555
c([nH]1)nc2c1nncc2-c1cc(-c2ccccc2)ccc1	1	Drug Scaffolds	0.52381	0.76113	4	0.35546
N=C(C(N[C@H]([C@@H]1SCC=CN11)C1=O)=O)c1c[s]cn1	4	Drug Scaffolds	0.57895	0.78648	3	0.35539
O=C(c1cnccc1)N1CCN(Cc2ccccc2)CC1	1	Drug Scaffolds	0.66667	0.60895	3	0.35538
c1n[nH]c(cc2)c1cc2Oc1ccccc1	2	Drug Scaffolds	0.625	0.63799	3	0.35533
O=C(CN1CCN(Cc(cc2)cc3c2OCO3)CC1)N1c(cccc2)c2Sc2c1cccc2	1	Drug Scaffolds	0.51515	0.78531	6	0.35532
N=C(C(N[C@@H]([C@H]1SCC(C[n+]2c(CCC3)c3ccc2)=CN11)C1=O)=O)c1c[s]cn1	1	Drug Scaffolds	0.55172	0.88433	5	0.35524
O=C(C1)c(cccc2)c2Nc2c1cccc2	1	Drug Scaffolds	0.5	0.67908	3	0.35513
C(c1ccccc1)Nc1ncccc1	4	Drug Scaffolds	0.71429	0.4995	2	0.35512
C(c1c[nH]c2c1cccc2)c1nc(cccc2)c2[s]1	1	Drug Scaffolds	0.57895	0.76987	4	0.35506
O=C(CNC(c1cnc[s]1)=O)NCC(N[C@@H](Cc1ccccc1)C(C1OC1)=O)=O	1	Drug Scaffolds	0.58621	0.72502	3	0.35493
O=C(c1c(N2)nc[n]1CC1OCCO1)NC2=O	1	Drug Scaffolds	0.58824	0.78295	3	0.35489
O=C(C1(CC1)C(Nc(cc1)ccc1Oc1c2[s]c(-c3ncccc3)cc2ncc1)=O)Nc1ccccc1	1	Drug Scaffolds	0.59459	0.84479	6	0.35475
C(c1c[nH]nn1)c1cc2ccccc2cc1	1	Drug Scaffolds	0.625	0.57248	3	0.35469
C1C=CC(CC2)[C@@H]1[C@H](CC1)[C@H]2C2C1=CCCC2	1	Drug Scaffolds	0.52941	0.63126	4	0.35469
O=C(CCCN1C[C@H]2c(cccc3NCC4)c3N4[C@H]2CC1)c1ccccc1	1	Drug Scaffolds	0.55556	0.84972	5	0.35465
C(CNCC1)CN1c1nc(cccc2)c2[nH]1	1	Drug Scaffolds	0.5625	0.69862	3	0.35464
O=C(C[C@@H]1CC2)OCC1[C@@H]1[C@@H]2[C@H](CCC2)C2CC1	1	Drug Scaffolds	0.55556	0.61868	4	0.35463
O=C(N[C@H](CCNS(c(cc1)cc2c1OCO2)(=O)=O)Cc(cc1)ccc1OCc1c[s]cn1)O[C@@H]1[C@H](CCO2)[C@H]2OC1	1	Drug Scaffolds	0.47619	0.82714	6	0.35454
O=C([C@H](c1ccccc1)N1CCCCC1)O[C@@H]1C(CC2)CC[N+]2(CCc2ccccc2)C1	1	Drug Scaffolds	0.5	0.76182	6	0.35453
O=C1N(Cc2ccccc2)C2=NCCN2C2=C1CN(Cc1ccccc1)CC2	2	Drug Scaffolds	0.53571	0.87805	5	0.35449
C(C1)CNC[C@@H]1c(cc[n]1nc2)nc1c2-c1c[nH]nc1	1	Drug Scaffolds	0.55	0.84008	4	0.35449
O=C([C@@H]1[C@H](c2ccccc2)c2c3cc4OCOc4c2)OC[C@@H]1[C@@H]3O[C@@H](CC1)O[C@H]2[C@H]1OCOC2	2	Drug Scaffolds	0.44118	0.91597	7	0.35448
O=C([C@H](CCCc1ccccc1)[C@H]1c2ccccc2)N1c1ccccc1	1	Drug Scaffolds	0.53846	0.77181	4	0.3544
C(/C=C(\c1ccccc1)/c1ncccc1)N1CCCC1	2	Drug Scaffolds	0.5	0.68511	3	0.35434
C([C@H]1CNCC1)Oc1nc(Nc2c[nH]nc2)nc2c1cc[nH]2	1	Drug Scaffolds	0.54545	0.7971	4	0.35434
C(C(CC1)CCC1Oc1ccccc1)c1cccc(Nc2ncc[s]2)n1	1	Drug Scaffolds	0.65385	0.71292	4	0.35427
O=C(C=C1CCCC2CC2)OC(NC(N2)=O)=C1C2=O	1	Drug Scaffolds	0.57895	0.83186	3	0.35412
O=C(C=C1)NC(COc2cc3ccccc3nc2)=C1[n]1nccc1	1	Drug Scaffolds	0.54167	0.80548	4	0.35406
O=C1NC=CC=C1CN(CCc1c2cc(CC3COC3)cc1)C2=O	1	Drug Scaffolds	0.58333	0.78648	4	0.35404
C(C1)C1c1cc(N2CCOCC2)nc(C(C=CN2)=C3C2=NC=C3)n1	1	Drug Scaffolds	0.45833	0.8444	5	0.354
O=C([C@H](C1)CN[C@H](Cc2c[nH]3)[C@H]1c1c2c3ccc1)N[C@@H]1OC([C@H](CCC2)N2C([C@@H]2Cc3ccccc3)=O)N2C1=O	1	Drug Scaffolds	0.45	0.9724	8	0.35393
O=C(C1(CCCCc2ccccc2)CCCC1)N[C@@H](CCc(cccc1)c1N1)C1=O	1	Drug Scaffolds	0.56667	0.75547	4	0.35391
C(CNCCc1ccccc1)C(c1ccccc1)c1ccccc1	1	Drug Scaffolds	0.58333	0.54381	3	0.3539
O=C(CCc1cc2ccccc2cc1)NCC(NC(Cc1c[nH]c2c1cccc2)C(NCCc1ccccc1)=O)=O	1	Drug Scaffolds	0.53659	0.78992	5	0.35388
C(CNC1)c2c1cccc2	1	Drug Scaffolds	0.6	0.63561	2	0.35375
O=S(Nc1nc(SCc2ccccc2)ncc1)(N1CCC1)=O	1	Drug Scaffolds	0.63636	0.67279	3	0.35371
O=C(CC1)N[C@]1(CC1)CN[C@]1(COCc1ccccc1)c1ccccc1	1	Drug Scaffolds	0.53846	0.79105	4	0.35359
C(c1nccnc1)Nc1ccnc(Nc2ccccc2)n1	1	Drug Scaffolds	0.66667	0.65353	3	0.35347
C(c(cc1)c2[n]1ncnc2Nc1ccccc1)N1CCCCC1	1	Drug Scaffolds	0.56522	0.81625	4	0.35336
C(CN(CC1)CCC1c1ccccc1)C(c1ccccc1)c1ccccc1	4	Drug Scaffolds	0.55556	0.55597	4	0.35332
O=C(c(cccc1)c1-c1ccccc1)NC1CCN(CCCCC2c(cccc3)c3-c3c2cccc3)CC1	1	Drug Scaffolds	0.55263	0.77749	6	0.35322
O=C(c1ccccc1)NCC1NCCC1	1	Drug Scaffolds	0.66667	0.54381	2	0.3532
C([C@@H]1NCCCC1)O[C@H](CC1)CC[C@H]1c1ccccc1	1	Drug Scaffolds	0.7	0.62421	3	0.3531
C1CC(Nc2ncnc3c2nc[nH]3)OCC1	1	Drug Scaffolds	0.5625	0.72232	3	0.35305
C([C@H](CC1)O[C@H]1[n]1c2ncnc(NC3CCCC3)c2nc1)Sc1ccccc1	1	Drug Scaffolds	0.60714	0.8293	5	0.35302
O=C1OC(CN2CCOCC2)CN1/N=C/c1ccc[o]1	1	Drug Scaffolds	0.65	0.68393	3	0.35297
O=C(C1CC1)OCc1cc(Oc2ccccc2)ccc1	3	Drug Scaffolds	0.65	0.58251	3	0.35293
O=C(C(Cc1c[nH]c2c1cccc2)NC(OC1[C@H]2C[C@H](C3)C[C@@H]1C[C@H]3C2)=O)NCCc1ccccc1	1	Drug Scaffolds	0.47222	0.8075	7	0.35257
O=C(c1c(N2)nc[n]1CCNCCc1ccccc1)NC2=O	2	Drug Scaffolds	0.68182	0.77625	3	0.35251
O=C(C1(CCCCc2cccc3ccccc23)CCCC1)N[C@@H](CCc(cccc1)c1N1)C1=O	1	Drug Scaffolds	0.52941	0.77994	5	0.35248
C([C@H](C1CC2)[C@H]3[C@H]2C(CCCC2)C2=CC3)C=C1[n]1c(cccc2)c2nc1	1	Drug Scaffolds	0.53846	0.82089	6	0.35244
O=C(Nc1ncccc1)OC[n+]1c[n](CC(Cc2nc(-c3ccccc3)c[s]2)c2ccccc2)nc1	1	Drug Scaffolds	0.58333	0.7971	5	0.35242
O=C(/C=C/C(OCCC[NH+](CC1)[C@@H](c2ccccc2)c2c1cccc2)=O)OCCC[NH+](CC1)[C@H](Cc2ccccc2)c2c1cccc2	1	Drug Scaffolds	0.53191	0.77436	6	0.35221
O=C1N=CC(Oc2ccccc2)=CN1	1	Drug Scaffolds	0.71429	0.55597	2	0.3521
O=C(CNC(c1ccccc1)=O)N(CCC1)[C@@H]1C(N[C@@H](C1)COC1=O)=O	1	Drug Scaffolds	0.61538	0.73284	3	0.35207
O=C(N1)N(CCc2c3cccc2)C3=C/C\1=N\c1ccccc1	1	Drug Scaffolds	0.54545	0.83102	4	0.35207
O=C(CCc1ncccc1)O[C@@H](CC1C2)C=C2[C@H]2OCO[C@H]2C(CC[C@H]2OCC22)[C@@H]2[C@@H]1OC(c1ccccc1)=O	1	Drug Scaffolds	0.45	0.87019	6	0.35204
O=S(c1ccccc1)(Nc1cc(-c2cnccc2)ccc1)=O	1	Drug Scaffolds	0.59091	0.68976	3	0.352
O=C(COc(cc1)cc(S(CCC2)(=O)=O)c1N2c1ccccc1)NCc1ccccc1	1	Drug Scaffolds	0.58065	0.8003	4	0.35197
O=C(CP(CCCCc1ccccc1)=O)N(CC1)CC1C1CCCCC1	1	Drug Scaffolds	0.69231	0.64904	3	0.35193
c(cc1)ccc1Nc1c(cccc2)c2nc2ccccc12	1	Drug Scaffolds	0.47619	0.6715	4	0.3519
C(c1cc(cccc2)c2[s]1)c1cc([C@@H]2OCCCC2)ccc1	1	Drug Scaffolds	0.59091	0.74025	4	0.35189
O=C(c1nc(N(CCC2)CCN2C2CCNCC2)ccc1)Nc1ccncc1	1	Drug Scaffolds	0.60714	0.74882	4	0.35187
C1[n]2c(nc(-c3cncnc3)nc3N4CCOCC4)c3nc2COC1	1	Drug Scaffolds	0.44	0.82315	5	0.35183
O=C(CCc1ccccc1)O[C@@H](CC(C1)[C@H]([C@H]2[C@@]3(C4)[C@@H]4C[C@H]4OCC24)OC(c2ccccc2)=O)C=C1CC3=O	1	Drug Scaffolds	0.46154	0.86791	7	0.35179
O=C(CCN1CCOCC1)N1c(cccc2)c2Sc2c1cccc2	1	Drug Scaffolds	0.5	0.73028	4	0.3516
O=C(NCC1(CCCC1)c1ccccc1)Nc1ccccc1	1	Drug Scaffolds	0.59091	0.64751	3	0.35158
O=C(C1)Nc(cccc2)c2SC1c1ccccc1	1	Drug Scaffolds	0.55556	0.72232	3	0.35156
O=C(c1cc(cccc2)c2[s]1)N[C@@H]1C(CC2)CCN2C1	1	Drug Scaffolds	0.55	0.75474	5	0.35151
O=C(NC1)OC11CCN(CCc2ccccc2)CC1	1	Drug Scaffolds	0.68421	0.62778	3	0.35146
C(C1)C1Nc1ncnc2c1nc[n]2C1C=CCC1	1	Drug Scaffolds	0.55556	0.77749	4	0.35137
C(c1ccc[o]1)Nc1ccccc1	1	Drug Scaffolds	0.69231	0.47083	2	0.35125
O=C(C[C@@H](c1nnc[n]1-c1c2cc[s]1)N=C2c1ccccc1)NCCCN1CCNCC1	1	Drug Scaffolds	0.53125	0.89853	5	0.35094
O=C(C1CC1)NCc1cccc(C(N2C(CCC(N3)=O)C3=O)=O)c1C2=O	1	Drug Scaffolds	0.53846	0.80599	4	0.35094
O=C1N=C(N2CCN(CC3CCCCC3)CC2)Sc2c1cccc2	1	Drug Scaffolds	0.625	0.75474	4	0.35093
C(CC1)CC1OC1=CC2=CC[C@@H]([C@H](CCC3)C3CC3)[C@H]3C2CC1	2	Drug Scaffolds	0.56522	0.72502	5	0.35093
O=C(c1cccc(C(NCc2cnccc2)=O)c1)NCc1cnccc1	1	Drug Scaffolds	0.65385	0.60279	3	0.35085
C(CC1)CCC1Nc1c(cc[nH]2)c2nc(-c2ccccc2)n1	1	Drug Scaffolds	0.54545	0.75329	4	0.35084
C(CNCc1ccccc1)c1c[nH]c2c1cccc2	2	Drug Scaffolds	0.68421	0.67279	3	0.35078
O=C([C@H](C/C=C/c1ccccc1)[C@H]1c2ccccc2)N1c1ccccc1	1	Drug Scaffolds	0.53846	0.77872	4	0.35077
O=C1C=C2C=C[C@@H]([C@H](CCC3)C3CC3)[C@H]3C2[C@@H]2[C@H]1C2	1	Drug Scaffolds	0.52632	0.72591	6	0.35076
O=C1N([C@@H](CCC(N2)=O)C2=O)c2ccc(Cc3ccc(CN4CCOCC4)cc3)c3cccc1c23	1	Drug Scaffolds	0.57143	0.87019	6	0.3505
O=C(/C=C\[n]1nc(-c2ccccc2)nc1)NNc1nccnc1	1	Drug Scaffolds	0.69565	0.67908	3	0.35045
C(C1CCNCC1)Nc(ncnc1)c1-c(cc1)ccc1Oc1ccccc1	1	Drug Scaffolds	0.62963	0.69315	4	0.35038
O=S(c(cc1)ccc1N[C@@H]1CN(Cc2ccccc2)CC1)(Nc1c[s]cn1)=O	1	Drug Scaffolds	0.64286	0.71389	4	0.35034
C(COc1ccccc1)c1ccccc1	1	Drug Scaffolds	0.73333	0.44158	2	0.35033
O=C([C@H]1CC=CCC1)N(C1CCC(CO[C@@H]2COCC2)CC1)c1c[s]cc1	1	Drug Scaffolds	0.55556	0.7473	4	0.3502
O=C1NCc2c1ccc(NCc1ccc(ccc(N=CN3)c4C3=O)c4c1)c2	1	Drug Scaffolds	0.55556	0.79383	5	0.3502
O=C(CC(CCC1)[C@@H]1[C@@H]1CC2)[C@@H]1C(C=C1)C2=CC1=O	2	Drug Scaffolds	0.52632	0.73199	4	0.35016
C(CNc1ncccc1)c1ccccc1	1	Drug Scaffolds	0.73333	0.49511	2	0.35015
C(Cc1nc2cncnc2nc1)c1ccccc1	2	Drug Scaffolds	0.66667	0.66621	3	0.35011
O=S(c1ccccc1)(NCc(cc1)ccc1-c1n[o]cn1)=O	1	Drug Scaffolds	0.63636	0.64441	3	0.35011
O=C(CNC(c1nc2ccccc2cc1)=O)N[C@@H](CCN1C[C@H](CCCC2)[C@H]2CC1)Cc1ccccc1	1	Drug Scaffolds	0.54054	0.76523	5	0.35005
O=S(c1ccccc1)(Nc1nc2ccccc2nc1)=O	1	Drug Scaffolds	0.6	0.69754	3	0.35
C(c1ccccc1)Nc1c2nc[n]([C@@H]3OCCC3)c2ncn1	2	Drug Scaffolds	0.59091	0.807	4	0.34995
O=C(CC1)C[C@H]1/C=C/CCc1ccccc1	1	Drug Scaffolds	0.75	0.49511	2	0.34974
O=C(CCS(c1ccccc1)(=O)=O)Nc1ccccc1	1	Drug Scaffolds	0.65	0.59413	2	0.3497
C(CC1COC2)C2N1c1nc(N2CCOCC2)nc2nc(-c3ccccc3)ccc12	1	Drug Scaffolds	0.43333	0.85628	7	0.34963
C(c(cccc1)c1-c1ccccc1)Oc1ncnc(N2CCC3(CNCC3)CC2)c1	1	Drug Scaffolds	0.56667	0.75547	5	0.34961
O=C(c1c2OCCc2ccc1)NC1CCNCC1	1	Drug Scaffolds	0.55556	0.72942	3	0.3496
O=C(C1CCCCC1)N(CC1N2CCc3c1cccc3)CC2=O	1	Drug Scaffolds	0.52174	0.78413	4	0.34957
O=C(N[C@H]1N=C(c2ccccc2)c(cccc2)c2NC1=O)Nc1ccccc1	1	Drug Scaffolds	0.5	0.81096	4	0.34948
O=C(c1ccc[s]1)NCC(CN1c(cc2)ccc2N(CCOC2)C2=O)OC1=O	1	Drug Scaffolds	0.60714	0.73864	4	0.34938
O=C([C@@H]1[C@H](c2ccccc2)c2c3cc4OCOc4c2)OC[C@@H]1[C@@H]3O[C@@H](CC1)O[C@H]2[C@H]1OCOC2	2	Drug Scaffolds	0.44118	0.90551	7	0.34925
C(\c1cncnc1)=C\[n]1nc(-c2ccccc2)nc1	1	Drug Scaffolds	0.68421	0.63799	3	0.34922
C(c1ncccc1)Nc1nc(-c2cnccc2)nc2cccc(-c3ccccc3)c12	1	Drug Scaffolds	0.43333	0.84401	5	0.34919
O=C1c(ccc(N2CCNCC2)c2OCC3)c2N3C=C1	1	Drug Scaffolds	0.5	0.84087	4	0.34918
O=C1c(ccc(N2CCCCC2)c2)c2N(C2CC2)C=C1	2	Drug Scaffolds	0.5	0.76657	4	0.34911
O=C(C1=CC=CN(Cc2ccccc2)C1=O)NC1CCCCC1	1	Drug Scaffolds	0.6087	0.72942	3	0.34907
C(c1cc(-c2ccccc2)ccc1)OC1=CCCC(OCc2cnccc2)=C1	1	Drug Scaffolds	0.64286	0.69969	4	0.34905
C(C1CN(C2)CC3C1)[C@@H]2[C@@H]3Oc1nnc(-c2ccccc2)[s]1	1	Drug Scaffolds	0.59091	0.78235	6	0.34901
C([C@@H](c1ccccc1)S1)S/C\1=C\[n]1cncc1	1	Drug Scaffolds	0.64706	0.6621	3	0.34893
O=C(c1ccccc1)NC[C@@H](CCN(CC1)CCC1c1ccccc1)c1ccccc1	1	Drug Scaffolds	0.58065	0.64751	4	0.34886
O=C(CN([C@@H](CNC12CCCC1)c1ccccc1)C2=O)Nc1cc(C[C@](C2)(c3c(N4)nccc3)C4=O)c2cc1	1	Drug Scaffolds	0.46154	0.9215	7	0.34881
N=C(C1)C2(CNC2)CN1c(cc1)nc(N(C2CC2)C=C2)c1C2=O	1	Drug Scaffolds	0.47826	0.84594	5	0.34873
C(c1c[nH]c2c1cccc2)c1nc2ccccc2cc1	1	Drug Scaffolds	0.6	0.75832	4	0.34865
O=C(c1ccccc1)NNCc1ccccc1	1	Drug Scaffolds	0.70588	0.46544	2	0.34851
C(CNC1)[C@@H]1Oc(cc1)ccc1C(c1c(CCC2)cccc1)=C2c1ccccc1	1	Drug Scaffolds	0.48276	0.78821	5	0.34845
O=C(CC1CCCCC1)N(CC1)[C@@H]1C(NCc1ccccc1)=O	1	Drug Scaffolds	0.65217	0.68861	3	0.3484
C(/C=C\c1cnc[n]1Cc1ccccc1)c1ccc[s]1	1	Drug Scaffolds	0.65	0.64751	3	0.34831
C(c1ccccc1)N(CC1)CCC1Nc1c(cc[s]2)c2ncn1	1	Drug Scaffolds	0.6087	0.74185	4	0.34831
O=C(Cc1ccccc1)O[C@H]1C[C@H](CC2)[NH+](Cc3ccccc3)[C@H]2C1	1	Drug Scaffolds	0.64	0.72768	5	0.34826
O=C1Nc(cccc2)c2C(CCN(CC2)CCN2c2nccc3c2cc[s]3)=C1	1	Drug Scaffolds	0.53571	0.83144	5	0.34825
O=C(C=C1)Nc2c1ncc(Cc1ccccc1)c2	1	Drug Scaffolds	0.61111	0.73701	3	0.34824
C=C1c(cccc2)c2OCc2c1cccc2	2	Drug Scaffolds	0.5	0.73452	3	0.34822
O=C(C=CN1c2ccccc2)c(cc2)c1nc2N1C[C@H](C2)[C@H]2C1	2	Drug Scaffolds	0.52174	0.83059	6	0.34816
O=C(CCc1ccc[o]1)O[C@@H](CC(C1)[C@H](C2C3CC[C@H]4OCC24)OC(c2ccccc2)=O)C=C1CC3=O	1	Drug Scaffolds	0.45946	0.82538	5	0.34808
C([C@H](C1)COc2c1ccc(-c1ccccc1)c2)c1ccccc1	1	Drug Scaffolds	0.65217	0.71096	4	0.34805
C1C(c2ccc[s]2)=NO[C@@H]1c1ccccc1	1	Drug Scaffolds	0.625	0.69754	3	0.34801
O=C(c1cnc[n]1Cc(cc1)ccc1-c(cccc1)c1-c1nnn[nH]1)OCC(O1)=COC1=O	1	Drug Scaffolds	0.57576	0.80998	5	0.34797
O=C(CC[NH+](CC1)[C@H](Cc2ccccc2)c2c1cccc2)OCCCCCOC(CC[NH+](CC1)[C@H](Cc2ccccc2)c2c1cccc2)=O	1	Drug Scaffolds	0.55102	0.72942	6	0.34793
O=C1c(ccc(N2CC3(CC3)CC2)c2)c2N(C2CC2)C=C1	2	Drug Scaffolds	0.47619	0.78295	5	0.34793
O=C(CCCc1ccccc1)N1Cc2nnc[n]2CC1	1	Drug Scaffolds	0.65	0.65645	3	0.3479
O=C(CC(N1)=O)NC1=O	16	Drug Scaffolds	0.55556	0.62123	1	0.3478
O=C1C=C(CC[C@@H]2[C@@H]3CCC4C5OCO[C@@H]5C[C@@H]24)C3C=C1	2	Drug Scaffolds	0.57143	0.76319	5	0.34775
N=C1N(C2CCCCC2)C=Nc2c1c(-c1ccccc1)c(-c1ccccc1)[n]2Cc1ccccc1	1	Drug Scaffolds	0.4	0.93546	6	0.34771
C(CNc1ccccc1)c1ccccc1	1	Drug Scaffolds	0.73333	0.44158	2	0.34767
N=C(C(N[C@H]([C@@H]1SCC=CN11)C1=O)=O)c1ccc[o]1	2	Drug Scaffolds	0.57895	0.78648	3	0.3476
O=C1N(Cc2ncccn2)CCOc(cc2)c1cc2-c1ccccc1	1	Drug Scaffolds	0.56	0.76921	4	0.34756
C1C=CNC=C1	1	Drug Scaffolds	0.66667	0.3662	1	0.34751
C(C1)[C@H](C2)O[C@@H]1CC2c1cc(N2CCOCC2)nc2c1cn[n]2-c1n[nH]cc1	1	Drug Scaffolds	0.39286	0.90011	7	0.34747
O=C(Cc1ccccc1)NC(C1OCC(CSc2nnn[nH]2)=CN11)C1=O	1	Drug Scaffolds	0.65385	0.81387	4	0.34747
O=C(Cc1ccccc1)NCc1ccncc1	1	Drug Scaffolds	0.70588	0.51193	2	0.34744
O=C(c1n[nH]cc1NC(c1ccccc1)=O)NC1CCNCC1	1	Drug Scaffolds	0.6087	0.72768	3	0.3474
O=C([C@@H](c1ccccc1)NC(N(CCNC1=O)C1=O)=O)N[C@@H]([C@H]1SCC(CSc2nnn[nH]2)=CN11)C1=O	1	Drug Scaffolds	0.51351	0.87433	5	0.34738
C(CC1CC2)C[C@H]1[C@H](CC1)[C@H]2C(C2)[C@@H]1Cc1c2cn[nH]1	1	Drug Scaffolds	0.5	0.68629	5	0.34728
O=C(c(cccc1)c1Nc1ccccc1)NOCC1CC1	1	Drug Scaffolds	0.61905	0.6593	3	0.34727
O=C1NC([C@H]2N(CC3)CCC3C2)=Nc2c1[s]c(-c1c[nH]nc1)c2	1	Drug Scaffolds	0.52174	0.88521	6	0.34721
O=C(CCc1ccccc1)c1ccccc1	1	Drug Scaffolds	0.6875	0.46544	2	0.34718
O=C(CCC1)N1c(cc1)cnc1Oc1cc(CCN(CC2)C3CCC3)c2cc1	1	Drug Scaffolds	0.60714	0.76657	5	0.34716
[truncated: 1,835 more rows]
